# Supplementary material for: Translocation of vaginal microbiota is involved in impairment and protection of uterine health
Source: PubMed Central journal article supplement (PMC8263591; doi:10.1038/s41467-021-24516-8), 2021-07-07
Supplement: 41467_2021_24516_MOESM1_ESM.pdf [file 41467_2021_24516_MOESM1_ESM.pdf]

## Supplementary Figures

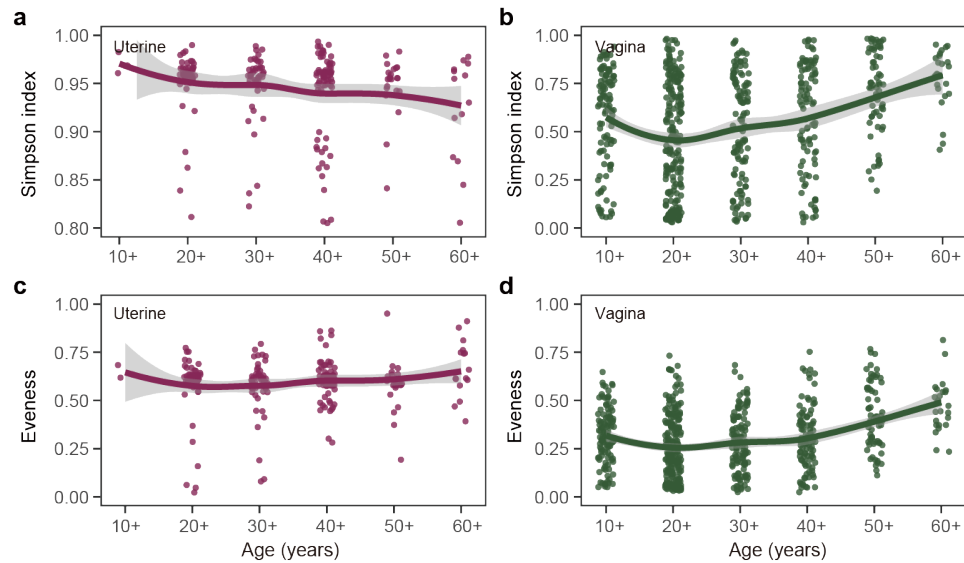

**Supplementary Fig. 1** Simpson index (a-b) and evenness (c-d) of the uterine and vaginal microbiota in women of different ages. The scales 10+, 20+, 30+, 40+, 50+, and 60+ on the x-axis represent ages <20, 20-29, 30-39, 40-49, 50-59, and  $\geq 60$  years old, respectively. The shadow around the linear regression trendline shows a 95% confidence interval (CI).

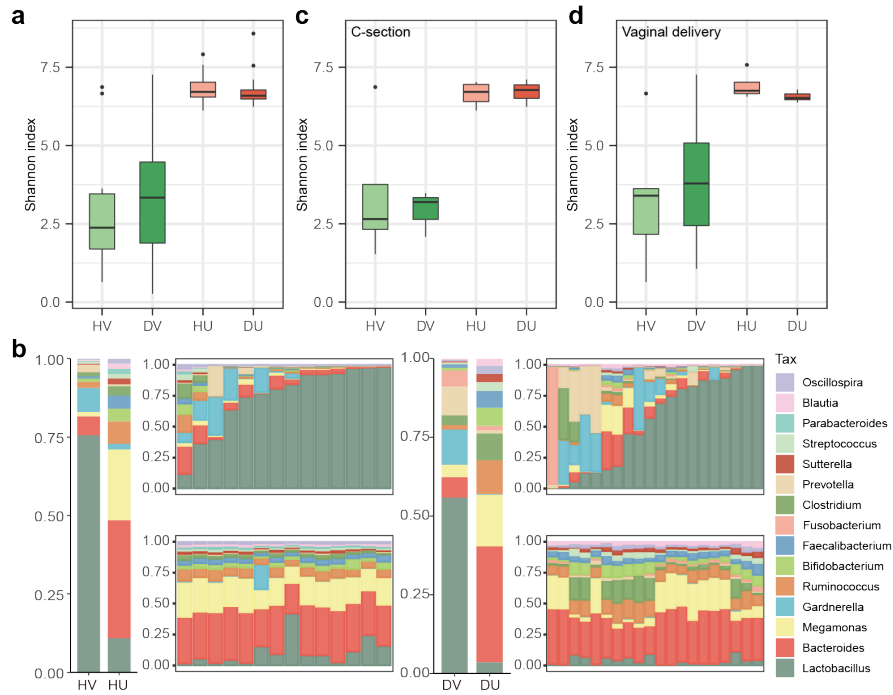

**Supplementary Fig. 2 Comparisons between microbiota of chronic endometritis and control when considering age and delivery modes.** **a** Microbial diversity of the uterine and vaginal microbiome in women of similar age (35~45 years old) with different health statuses. **b** Relative abundance of the dominant genera of the uterine and vaginal microbiome in women of similar age (35~45 years old) with different health statuses. The two bars on the left show the average relative abundance of each group. **c-d** Microbial diversities of the uterine and vaginal microbiome in women with different health statuses and delivery modes. HV, DV, HU, and DU represent healthy vagina, diseased vagina, healthy uterus, and diseased uterus, respectively. For a, c and d, box-plot elements are defined as: center line, median; box limits, upper and lower quartiles; whiskers,  $1.5 \times$  interquartile range; points, outliers.

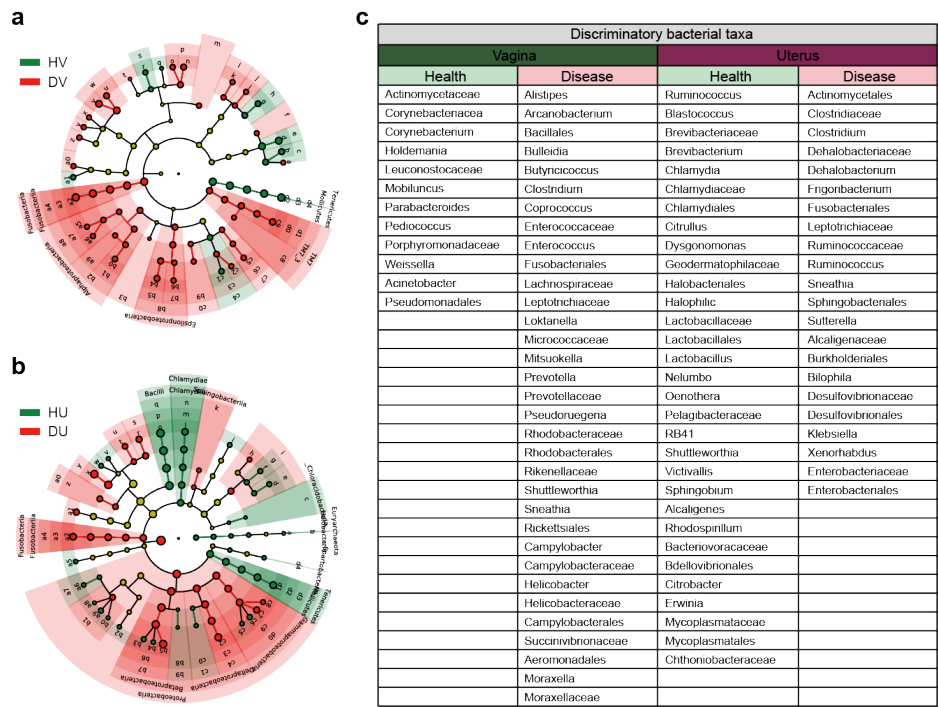

**Supplementary Fig. 3 Linear discriminant analysis (LDA) effect size (LEfSe) and discriminatory bacterial taxa of the uterine and vaginal microbiota of the women suffering from chronic endometritis. a-b** HV, DV, HU, and DU represent healthy vagina, diseased vagina, healthy uterus, and diseased uterus, respectively. **c** A value of log LDA score >3.0 was used as a threshold to identify significantly differential signature better discriminating the microbiota of women suffering from chronic endometritis (disease) or health.

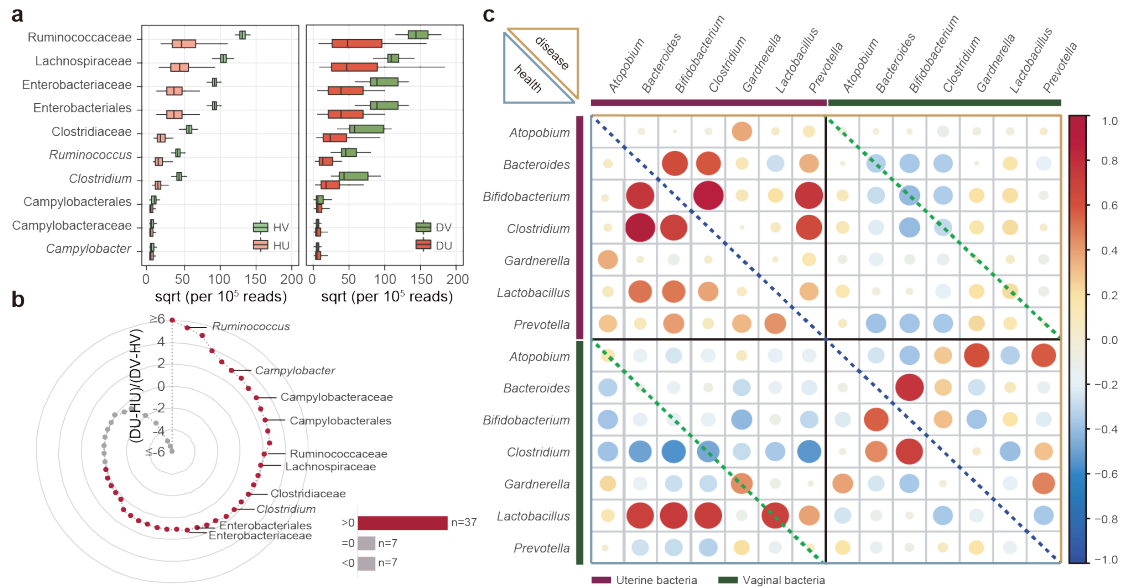

**Supplementary Fig. 4 Co-variation and co-occurrence between the uterine and vaginal microbiota associated with chronic endometritis.** **a** Relative abundance and rank of the high abundant discriminatory bacteria. Box-plot elements are defined as: center line, median; box limits, upper and lower quartiles; whiskers, 1.5× interquartile range. **b** Change direction in the relative abundance of the discriminatory bacteria between the health and disease groups. The change direction is measured by the ratio of  $\frac{DU_{median} - HU_{median}}{U_{mean}}$  to  $\frac{DV_{median} - HV_{median}}{V_{mean}}$ , in which HV, DV, HU, and DU represent the log<sub>10</sub> (relative abundance) of certain bacterial taxa in the microbiota of healthy vagina, diseased vagina, healthy uterus, and diseased uterus, respectively. If the ratio is positive, it means that the bacterial abundance changes with chronic endometritis are in the same direction between the uterine cavity and vagina. **c** Co-occurrence of seven bacterial genera across the two body sites. The blue dotted line divides different health states, and the pies on the two green dashed lines show the correlation of the same genus between the uterine and the vaginal microbiota in health or disease group.

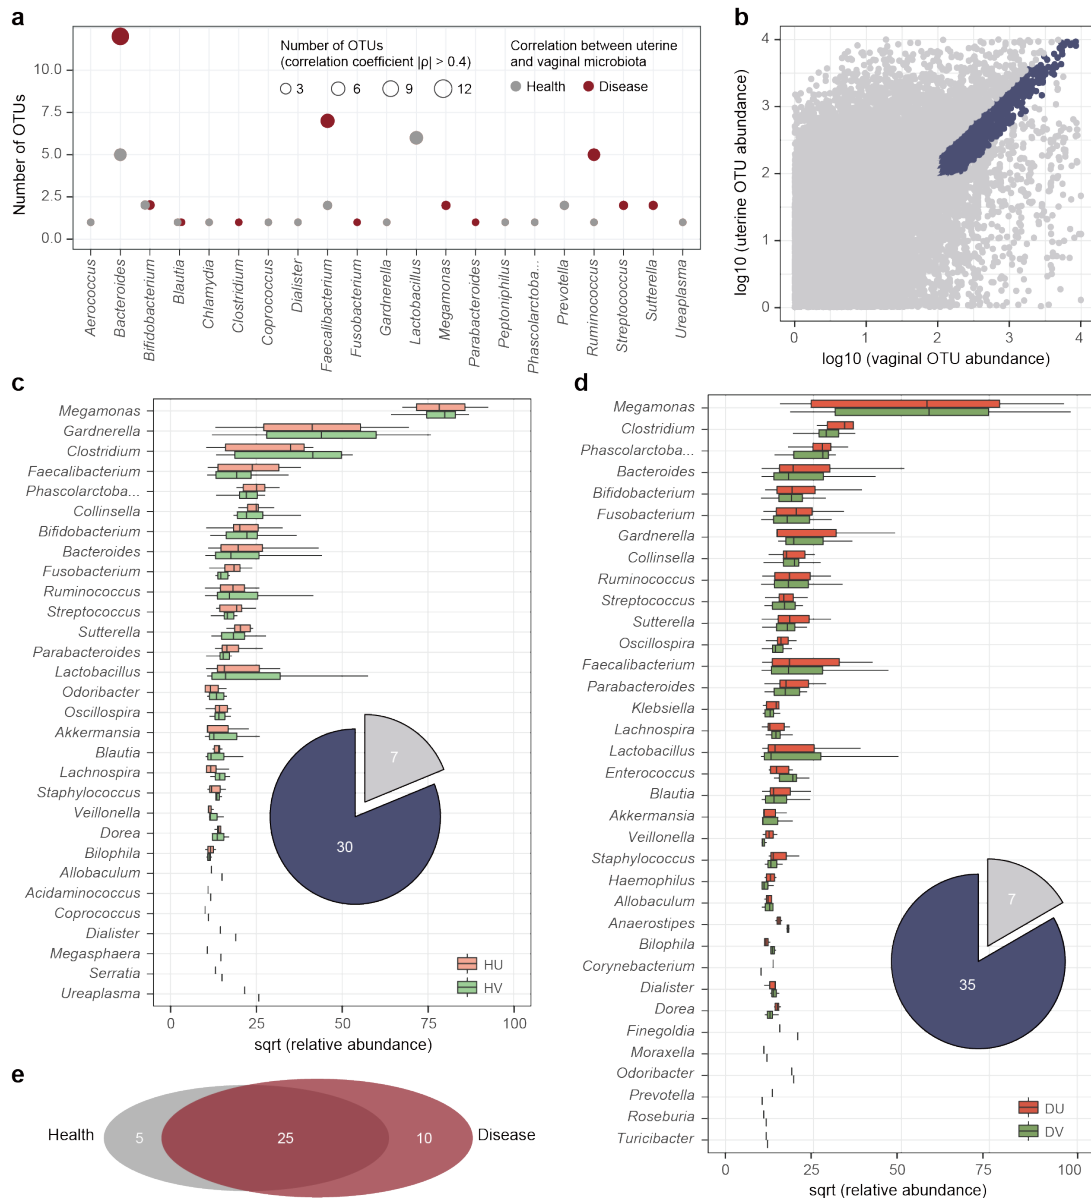

**Supplementary Fig. 5 Bacterial genera that tends to covariate with chronic endometritis between the uterine and the vaginal microbiota.** **a** Genera with strong correlation across two body sites. The correlation of each OTU was calculated in healthy and diseased women respectively, and the number of OTUs having correlation coefficient  $|\rho| > 0.4$  was counted. **b** OTUs with high and similar abundance in the uterine cavity and vagina (OUVs, dots in dark blue). **c** Taxonomic classification of OUVs and the relative abundance of OUVs genera in healthy women. Dark blue (30/37) and grey (7/37) sectors in pie diagram show the number of OUVs and non-OUVs genera, respectively. **d** Taxonomic classification of OUVs and the relative abundance of OUVs genera in women suffering from chronic endometritis. Dark blue (35/42) and grey (7/42) sectors in pie diagram show the number of OUVs and non-OUVs genera, respectively. **e** Overlap of OUV between health (25/30) and disease (25/35) group. HV, DV, HU, and DU represent healthy vagina, diseased vagina, healthy uterus, and diseased uterus, respectively. For c and d, box-plot elements are defined as: center line, median; box limits, upper and lower quartiles; whiskers,  $1.5 \times$  interquartile range.

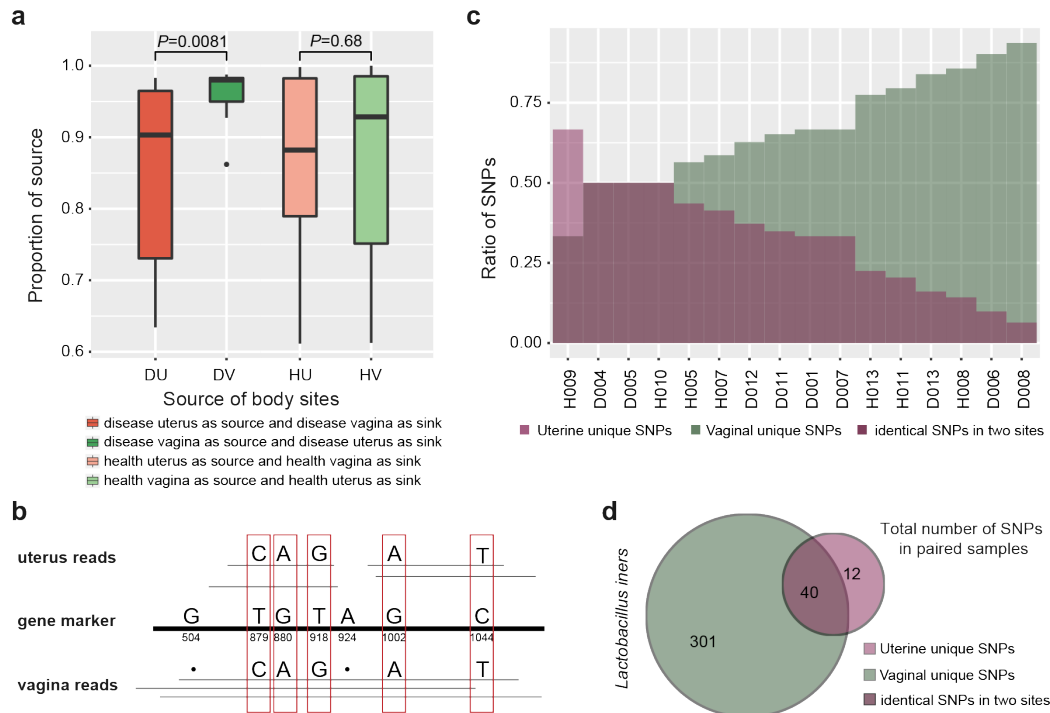

**Supplementary Fig. 6 Genus-level and strain-level bacterial source tracking between uterus and vagina.** **a** Source tracking of uterine and vaginal microbiota of the same subject based on 16S rRNA sequencing data. HV, DV, HU, and DU represent healthy vagina, diseased vagina, healthy uterus, and diseased uterus, respectively. Box-plot elements are defined as: center line, median; box limits, upper and lower quartiles; whiskers,  $1.5\times$  interquartile range; points, outliers.  $P$  values were determined by two-tailed Wilcoxon test. **b** Principle of strain-level bacterial source tracking. Uterus-vagina paired samples were aligned to the same species-specific gene marker. Red frames represent identical SNPs shared by each read pair in the same position. Dots in vaginal reads represent there is a gap in the same position of paired uterus reads. **c** Unique or identical SNPs in uterus and vagina of each subject. The height of each bar represents the ratio of SNPs in two body sites. Only subjects have identical SNPs in the same position of uterus-vagina paired samples are shown. **d** Number of SNPs in uterus and vagina for an abundant strain *Lactobacillus iners*.

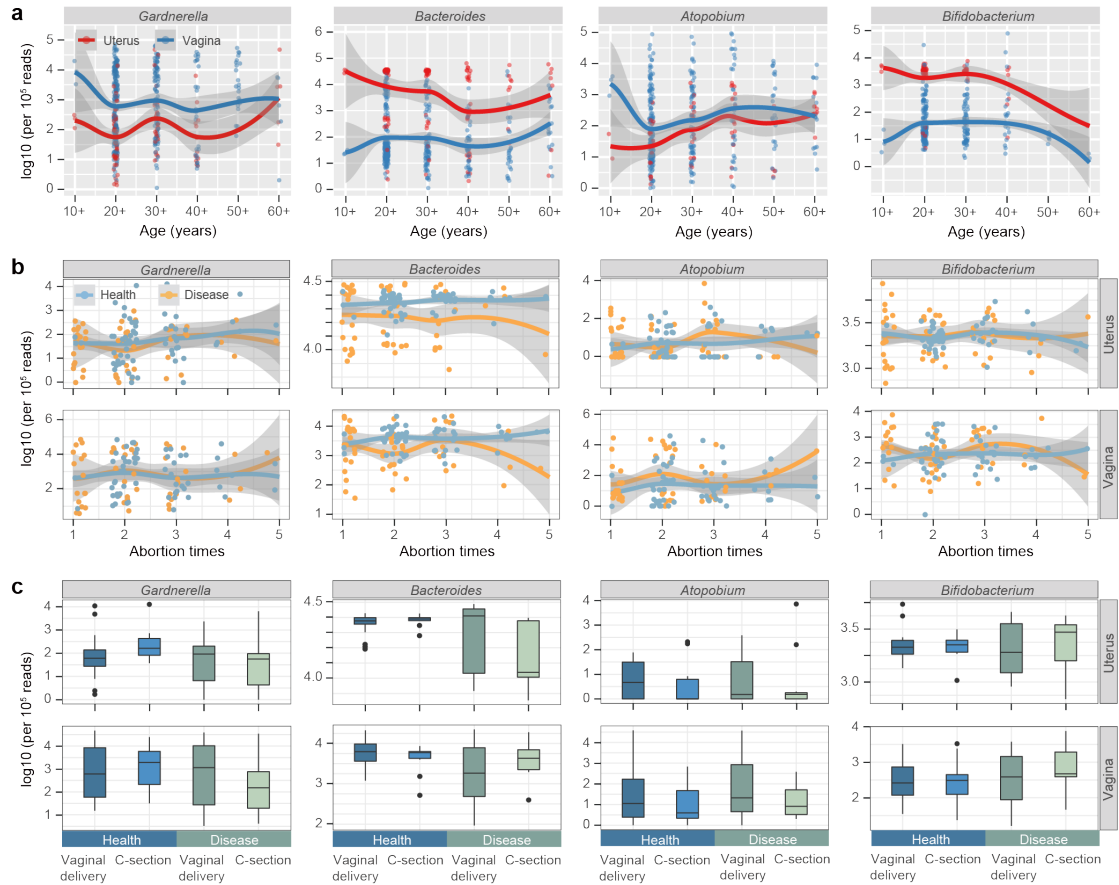

**Supplementary Fig. 7 The variation of four bacterial genera in the uterine and vaginal microbiota.** **a** Relative abundance in the uterine (red) and vaginal (blue) microbiota along with women's age. The values were normalized to  $10^5$  reads in each sample. **b** Relative abundance along with abortion times. For a and b, the shadow around the linear regression trendline shows the 95% confidence interval (CI). **c** Relative abundance along with previous delivery mode of women. Box-plot elements are defined as: center line, median; box limits, upper and lower quartiles; whiskers,  $1.5 \times$  interquartile range.

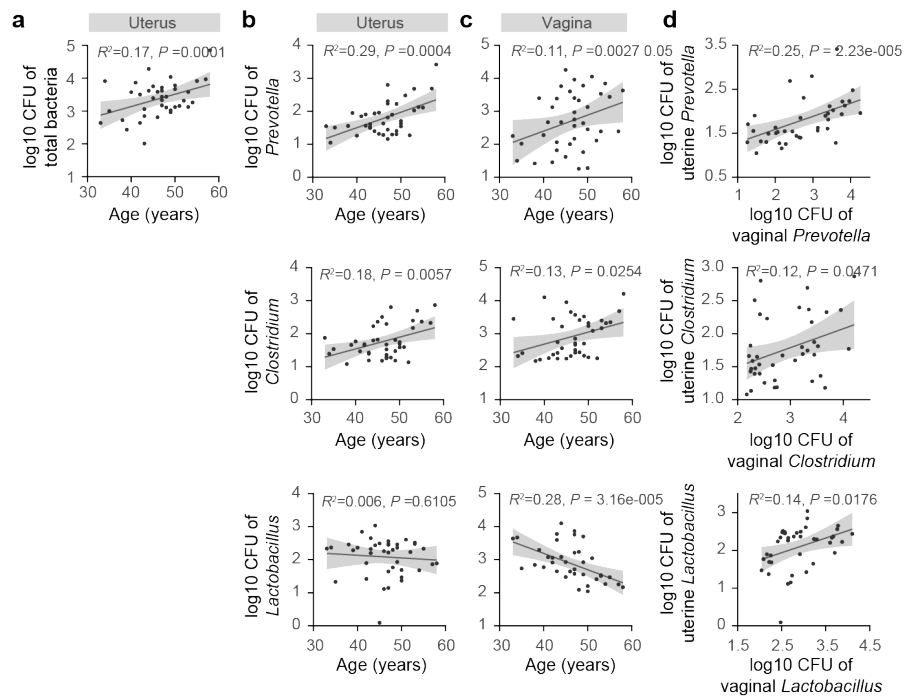

**Supplementary Fig. 8 qPCR quantification of the absolute abundance of bacteria in vaginal and uterine flushing fluid.** **a** Biomass of total bacteria at the genus level in uterine samples correlated with the age of women ( $n = 40$ ). **b-c** Biomass of *Prevotella*, *Clostridium* and *Lactobacillus* in the uterus and the vagina of women with different age, respectively. **d** Correlation of the same bacterial genus between the two body sites. Correlation analyses were performed based on Spearman's rho statistic. For a-d, linear regression was used to analysis the correlation between two pairs of data, the shadow around the trendline shows the 95% confidence interval (CI).



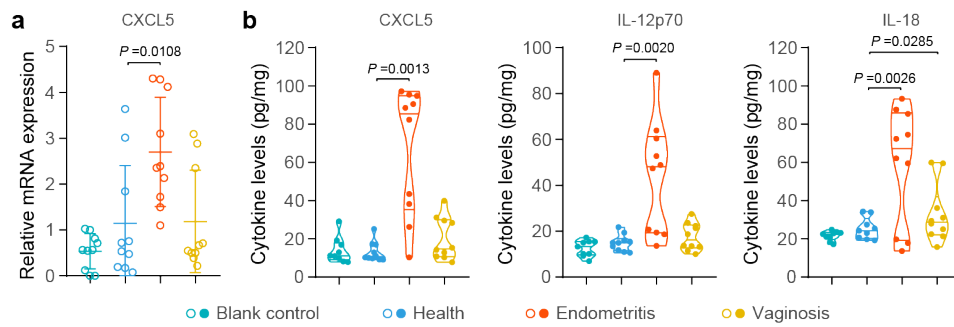

**Supplementary Fig. 9 The mRNA expression (a) and cytokine levels of inflammatory factors (b) in the endometrial tissues of the rats transplanting the vaginal microbiota of women to the rats' vagina.** Vaginal lavage fluids were collected from 10 women who were healthy, suffering from chronic endometritis or bacterial vaginosis, and then were transplanted into the vagina of SD rats after 1 week of antibiotic treatment. For each group,  $n=10$ .  $P$  values were determined by two-tailed Student's  $t$ -test. a, the lines among scatter shows the means  $\pm$  s.e.m. b, the width of the violin represents the density distribution, and the upper, center and lower lines among points represent upper quartile, median and lower quartile, respectively.

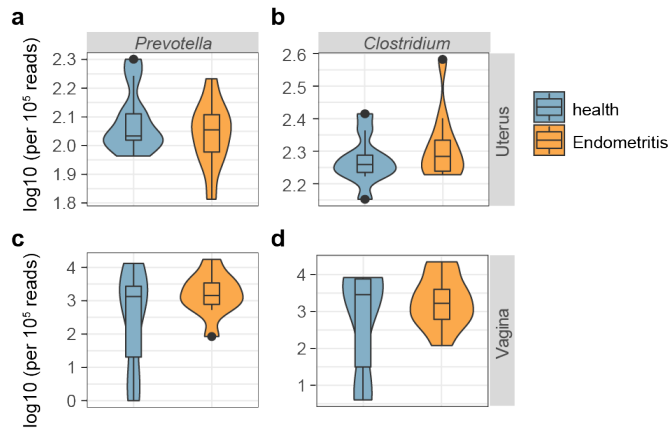

**Supplementary Fig. 10 Relative abundance of *Prevotella* and *Clostridium* in the uterine (a-b) and vaginal (c-d) microbiota of healthy women and women suffering from chronic endometritis.** Metagenomic sequencing was performed on 10 samples of each group, and reads were respectively mapped to the reference genomes of *Prevotella* and *Clostridium* strains deposited in the Human Microbiome Project (HMP). The violin with box plot shows the median and interquartile range, and the width of the violin represents the density distribution. Box-plot elements are defined as: center line, median; box limits, upper and lower quartiles; whiskers,  $1.5 \times$  interquartile range; points, outliers.

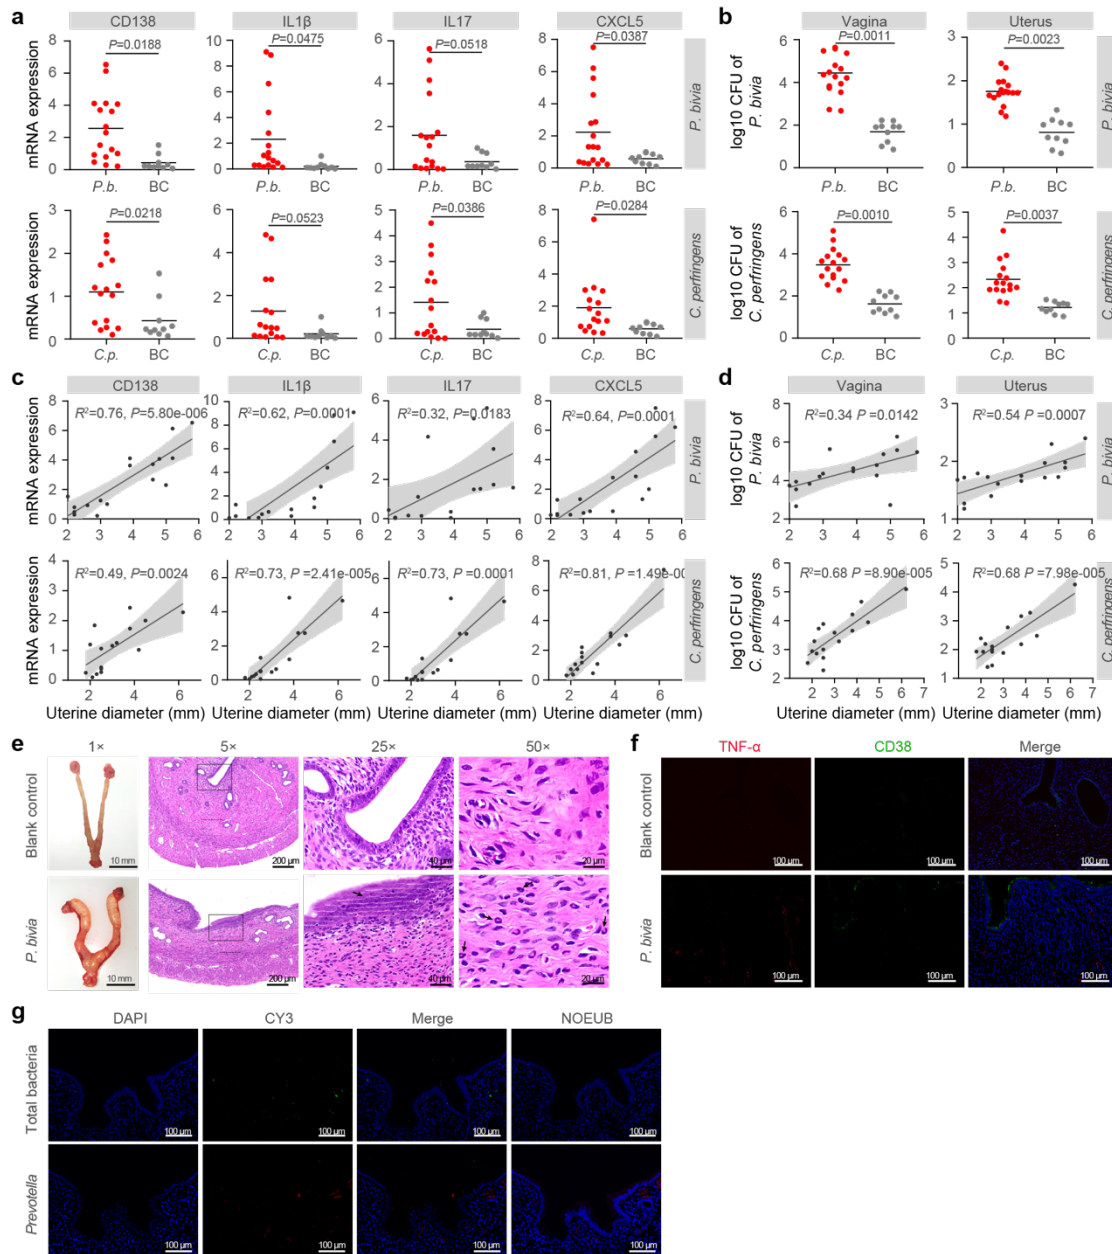

**Supplementary Fig. 11** Challenge experiment by injecting *Prevotella bivia* (*P. bivia*, *P.b.*) or *Clostridium perfringens* (*C. perfringens*, *C.p.*) into the vagina of SD rats. **a** Inflammatory factors of the endometrial tissue in the challenge rats. *P.b.*(n=17), *C.p.* (n=16) and BC rats (n=10). **b** The biomass of the transplanted strain in vagina and uterus quantified by qPCR. *P.b.*(n=17), *C.p.* (n=16) and BC rats (n=10). **c** Correlation between the mRNA expression level of inflammatory factors and uterine diameter. **d** Correlation between the biomass of the transplanted strain in vagina and uterus and uterine diameter. **e** Uterine bodies and hematoxylin-eosin staining of the endometrial tissues in the *P.b.* and BC rats. The 25 $\times$  and 50 $\times$  field of view show the areas within the solid and dashed frames of the 5 $\times$  field of view. The black arrows under 25 $\times$  field of view show hyperplastic endometrial epithelium. **f** Immunofluorescence assay illustrates the TNF- $\alpha$  and CD38 signals in the endometrial tissue of the *P.b.* and BC rats. **g** Fluorescence *in situ* hybridization (FISH) of total bacteria (green) and *Prevotella* (red)

in the uterine cavity of the *P.b.* rats. For a and b, *P* values were determined by two-tailed Student's *t*-test, and the bar represents the mean value. For c and d, linear regression was used to analysis the correlation between two pairs of data, and the shadow around the trendline shows the 95% confidence interval (CI). For e-g, images are representative of three independent experiments with similar results.

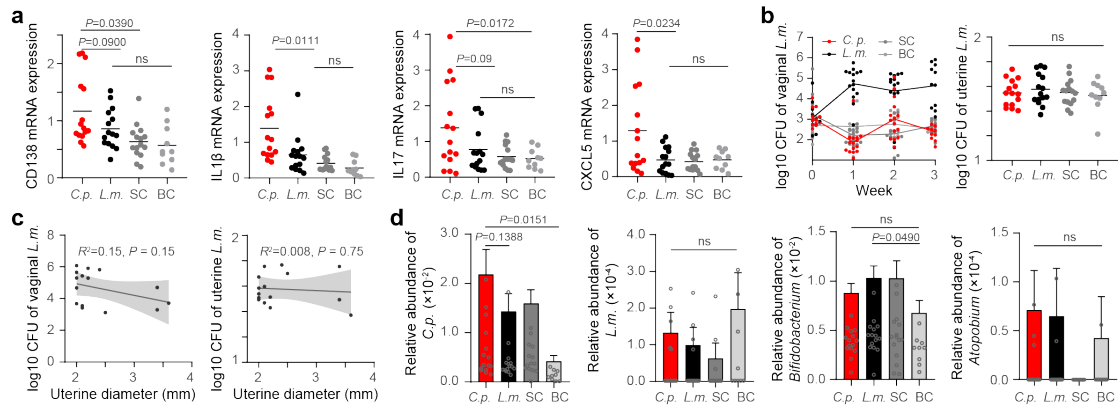

**Supplementary Fig. 12 The results of injecting *C.p.*, *Lactobacillus murinus* (*L. murinus*, *L.m.*), supernatant of *C. perfringens* (SC) and PBS (BC) into the vagina of SD rats. **a** The mRNA expression of inflammatory factors of the endometrial tissue in the vaginal microbiota transplantation (VMT) rats. **b** The biomass of vaginal and uterine *L.m.* in the VMT rats. **c** Correlations of the biomass of vaginal and uterine *L.m.* with uterine diameter. **d** Relative abundance of *C.p.*, *L.m.*, *Bifidobacterium*, and *Atopobium* in the uterine microbiota of the *C.p.* (n=15), *L.m.* (n=15), SC (n=15) and BC (n=10) rat group measured by the 16S rRNA amplicon sequencing. For a, b and d, *P* values were determined by one-way ANOVA with Tukey's multiple comparison post-hoc test, and data are presented as means  $\pm$  s.e.m.; c, linear regression was used to analysis the correlation between two pairs of data, and the shadow around the trendline shows the 95% confidence interval (CI); ns represent non-significant.**

## Supplementary Tables

**Supplementary Table 1 Metadata of the participants recruited in this study.**

| ID   | Age | # pregnancy | # delivery | # abortion | Delivery mode | Diagnosis | Country | Sex    |
|------|-----|-------------|------------|------------|---------------|-----------|---------|--------|
| H001 | 25  | 1           | 0          | 1          | -             | Health    | China   | Female |
| H002 | 34  | 2           | 1          | 1          | -             | Health    | China   | Female |
| H003 | 29  | 2           | 1          | 1          | -             | Health    | China   | Female |
| H004 | 24  | 1           | 0          | 1          | -             | Health    | China   | Female |
| H005 | 32  | 1           | 1          | 0          | -             | Health    | China   | Female |
| H006 | 26  | 0           | 0          | 0          | -             | Health    | China   | Female |
| H007 | 30  | 2           | 1          | 1          | -             | Health    | China   | Female |
| H008 | 27  | 1           | 0          | 1          | -             | Health    | China   | Female |
| H009 | 31  | 1           | 0          | 1          | -             | Health    | China   | Female |
| H010 | 27  | 2           | 1          | 1          | -             | Health    | China   | Female |
| H011 | 42  | 2           | 1          | 1          | -             | Health    | China   | Female |
| H012 | 26  | 2           | 1          | 1          | -             | Health    | China   | Female |
| H013 | 28  | 2           | 0          | 2          | -             | Health    | China   | Female |
| H014 | 30  | 2           | 1          | 1          | -             | Health    | China   | Female |
| H015 | 30  | 3           | 2          | 1          | Vaginal       | Health    | China   | Female |
| H016 | 36  | 3           | 1          | 2          | Vaginal       | Health    | China   | Female |
| H017 | 24  | 2           | 0          | 2          | -             | Health    | China   | Female |
| H018 | 32  | 6           | 3          | 3          | Vaginal       | Health    | China   | Female |
| H019 | 35  | 1           | 0          | 1          | -             | Health    | China   | Female |

|      |    |   |   |   |          |        |       |        |
|------|----|---|---|---|----------|--------|-------|--------|
| H020 | 39 | 3 | 1 | 2 | Vaginal  | Health | China | Female |
| H021 | 35 | 2 | 1 | 1 | Vaginal  | Health | China | Female |
| H022 | 33 | 3 | 1 | 2 | Vaginal  | Health | China | Female |
| H023 | 23 | 1 | 0 | 1 | -        | Health | China | Female |
| H024 | 42 | 3 | 1 | 2 | Vaginal  | Health | China | Female |
| H025 | 32 | 3 | 1 | 2 | Vaginal  | Health | China | Female |
| H026 | 27 | 1 | 0 | 1 | -        | Health | China | Female |
| H027 | 28 | 3 | 1 | 2 | Csection | Health | China | Female |
| H028 | 34 | 2 | 1 | 1 | Vaginal  | Health | China | Female |
| H029 | 29 | 1 | 0 | 1 | -        | Health | China | Female |
| H030 | 26 | 3 | 1 | 2 | Csection | Health | China | Female |
| H031 | 36 | 2 | 1 | 1 | Csection | Health | China | Female |
| H032 | 26 | 1 | 0 | 1 | -        | Health | China | Female |
| H033 | 29 | 3 | 2 | 1 | Vaginal  | Health | China | Female |
| H034 | 35 | 2 | 1 | 1 | Vaginal  | Health | China | Female |
| H035 | 20 | 2 | 0 | 2 | -        | Health | China | Female |
| H036 | 30 | 3 | 2 | 1 | Csection | Health | China | Female |
| H037 | 36 | 2 | 0 | 2 | -        | Health | China | Female |
| H038 | 29 | 3 | 1 | 2 | Vaginal  | Health | China | Female |
| H039 | 37 | 3 | 2 | 1 | Vaginal  | Health | China | Female |
| H040 | 30 | 1 | 0 | 1 | -        | Health | China | Female |
| H041 | 36 | 3 | 1 | 2 | Vaginal  | Health | China | Female |
| H042 | 25 | 2 | 0 | 2 | -        | Health | China | Female |
| H043 | 37 | 3 | 1 | 2 | Vaginal  | Health | China | Female |
| H044 | 29 | 4 | 1 | 3 | Vaginal  | Health | China | Female |

|      |    |   |   |   |          |        |       |        |
|------|----|---|---|---|----------|--------|-------|--------|
| H045 | 32 | 4 | 2 | 2 | Csection | Health | China | Female |
| H046 | 33 | 4 | 1 | 3 | Vaginal  | Health | China | Female |
| H047 | 36 | 2 | 0 | 2 | -        | Health | China | Female |
| H048 | 37 | 3 | 1 | 2 | Csection | Health | China | Female |
| H049 | 25 | 2 | 1 | 1 | Csection | Health | China | Female |
| H050 | 24 | 1 | 0 | 1 | -        | Health | China | Female |
| H051 | 24 | 2 | 1 | 1 | Vaginal  | Health | China | Female |
| H052 | 25 | 1 | 0 | 1 | -        | Health | China | Female |
| H053 | 26 | 4 | 0 | 4 | -        | Health | China | Female |
| H054 | 22 | 2 | 1 | 1 | Vaginal  | Health | China | Female |
| H055 | 22 | 1 | 0 | 1 | -        | Health | China | Female |
| H056 | 45 | 4 | 2 | 2 | Vaginal  | Health | China | Female |
| H057 | 39 | 4 | 1 | 3 | Csection | Health | China | Female |
| H058 | 27 | 2 | 0 | 2 | -        | Health | China | Female |
| H059 | 36 | 4 | 1 | 3 | Vaginal  | Health | China | Female |
| H060 | 22 | 1 | 0 | 1 | -        | Health | China | Female |
| H061 | 21 | 3 | 0 | 3 | -        | Health | China | Female |
| H062 | 32 | 2 | 1 | 1 | Vaginal  | Health | China | Female |
| H063 | 24 | 3 | 1 | 2 | Csection | Health | China | Female |
| H064 | 29 | 3 | 1 | 2 | Vaginal  | Health | China | Female |
| H065 | 25 | 2 | 1 | 1 | Vaginal  | Health | China | Female |
| H066 | 27 | 2 | 1 | 1 | Vaginal  | Health | China | Female |
| H067 | 18 | 1 | 0 | 1 | -        | Health | China | Female |
| H068 | 36 | 2 | 2 | 0 | Csection | Health | China | Female |
| H069 | 38 | 3 | 1 | 2 | Vaginal  | Health | China | Female |



|      |    |   |   |   |          |              |       |        |
|------|----|---|---|---|----------|--------------|-------|--------|
| H070 | 46 | 4 | 1 | 3 | Vaginal  | Health       | China | Female |
| H071 | 19 | 1 | 0 | 1 | -        | Health       | China | Female |
| H072 | 32 | 5 | 1 | 4 | Csection | Health       | China | Female |
| H073 | 29 | 3 | 2 | 1 | Vaginal  | Health       | China | Female |
| D001 | 26 | 2 | 1 | 1 | -        | Endometritis | China | Female |
| D002 | 51 | 2 | 1 | 1 | -        | Endometritis | China | Female |
| D003 | 53 | 3 | 1 | 2 | -        | Endometritis | China | Female |
| D004 | 25 | 1 | 1 | 0 | -        | Endometritis | China | Female |
| D005 | 46 | 3 | 1 | 2 | -        | Endometritis | China | Female |
| D006 | 47 | 2 | 2 | 0 | -        | Endometritis | China | Female |
| D007 | 48 | 2 | 1 | 1 | -        | Endometritis | China | Female |
| D008 | 32 | 1 | 1 | 0 | -        | Endometritis | China | Female |
| D009 | 34 | 0 | 0 | 0 | -        | Endometritis | China | Female |
| D010 | 43 | 0 | 0 | 0 | -        | Endometritis | China | Female |
| D011 | 42 | 2 | 2 | 0 | -        | Endometritis | China | Female |
| D012 | 33 | 3 | 1 | 2 | -        | Endometritis | China | Female |
| D013 | -  | - | - | 0 | -        | Endometritis | China | Female |
| D014 | -  | - | - | 0 | -        | Endometritis | China | Female |
| D015 | 58 | 3 | 2 | 1 | Vaginal  | Endometritis | China | Female |
| D016 | 50 | 2 | 2 | 0 | Vaginal  | Endometritis | China | Female |
| D017 | 54 | 2 | 1 | 1 | Vaginal  | Endometritis | China | Female |
| D018 | 47 | 2 | 2 | 0 | Vaginal  | Endometritis | China | Female |
| D019 | 42 | 4 | 1 | 3 | Vaginal  | Endometritis | China | Female |
| D020 | 35 | 2 | 1 | 1 | Vaginal  | Endometritis | China | Female |
| D021 | 47 | 1 | 1 | 0 | Vaginal  | Endometritis | China | Female |

|      |    |   |   |   |          |              |       |        |
|------|----|---|---|---|----------|--------------|-------|--------|
| D022 | 42 | 2 | 2 | 0 | Vaginal  | Endometritis | China | Female |
| D023 | 46 | 3 | 1 | 2 | Vaginal  | Endometritis | China | Female |
| D024 | 50 | 3 | 1 | 2 | Vaginal  | Endometritis | China | Female |
| D025 | 43 | 4 | 2 | 2 | Vaginal  | Endometritis | China | Female |
| D026 | 50 | 3 | 1 | 2 | Vaginal  | Endometritis | China | Female |
| D027 | 43 | 4 | 1 | 3 | Csection | Endometritis | China | Female |
| D028 | 48 | 2 | 2 | 0 | Vaginal  | Endometritis | China | Female |
| D029 | 57 | 2 | 2 | 0 | Vaginal  | Endometritis | China | Female |
| D030 | 52 | 3 | 3 | 0 | Vaginal  | Endometritis | China | Female |
| D031 | 49 | 2 | 2 | 0 | Vaginal  | Endometritis | China | Female |
| D032 | 45 | 2 | 1 | 1 | Vaginal  | Endometritis | China | Female |
| D033 | 47 | 2 | 1 | 1 | Vaginal  | Endometritis | China | Female |
| D034 | 55 | 3 | 3 | 0 | Vaginal  | Endometritis | China | Female |
| D035 | 53 | 2 | 2 | 0 | Vaginal  | Endometritis | China | Female |
| D036 | 43 | 1 | 1 | 0 | Vaginal  | Endometritis | China | Female |
| D037 | 49 | 2 | 2 | 0 | Vaginal  | Endometritis | China | Female |
| D038 | 39 | 2 | 1 | 1 | Vaginal  | Endometritis | China | Female |
| D039 | 53 | 3 | 2 | 1 | Vaginal  | Endometritis | China | Female |
| D040 | 51 | 6 | 2 | 4 | Vaginal  | Endometritis | China | Female |
| D041 | 48 | 2 | 1 | 1 | Vaginal  | Endometritis | China | Female |
| D042 | 47 | 3 | 1 | 2 | Vaginal  | Endometritis | China | Female |
| D043 | 47 | 2 | 1 | 1 | Csection | Endometritis | China | Female |
| D044 | 33 | 3 | 2 | 1 | Csection | Endometritis | China | Female |
| D045 | 46 | 3 | 1 | 2 | Csection | Endometritis | China | Female |
| D046 | 40 | 1 | 1 | 0 | Csection | Endometritis | China | Female |

|      |    |   |   |   |          |              |       |        |
|------|----|---|---|---|----------|--------------|-------|--------|
| D047 | 44 | 1 | 1 | 0 | Vaginal  | Endometritis | China | Female |
| D048 | 47 | 2 | 1 | 1 | Vaginal  | Endometritis | China | Female |
| D049 | 34 | 2 | 1 | 1 | Vaginal  | Endometritis | China | Female |
| D050 | 44 | 3 | 1 | 2 | Vaginal  | Endometritis | China | Female |
| D051 | 41 | 1 | 1 | 0 | Vaginal  | Endometritis | China | Female |
| D052 | 45 | 2 | 1 | 1 | Vaginal  | Endometritis | China | Female |
| D053 | 49 | 1 | 1 | 0 | Vaginal  | Endometritis | China | Female |
| D054 | 38 | 1 | 1 | 0 | Vaginal  | Endometritis | China | Female |
| D055 | 52 | 2 | 1 | 1 | Csection | Endometritis | China | Female |
| D056 | 40 | 1 | 1 | 0 | Csection | Endometritis | China | Female |
| D057 | 52 | 2 | 2 | 0 | Vaginal  | Endometritis | China | Female |
| D058 | 49 | 0 | 0 | 0 | -        | Endometritis | China | Female |
| D059 | 39 | 1 | 1 | 0 | Vaginal  | Endometritis | China | Female |
| D060 | 64 | 4 | 4 | 0 | Vaginal  | Endometritis | China | Female |
| D061 | 45 | 3 | 1 | 2 | Csection | Endometritis | China | Female |
| D062 | 69 | 3 | 2 | 1 | Vaginal  | Endometritis | China | Female |
| D063 | 55 | 1 | 1 | 0 | Csection | Endometritis | China | Female |
| D064 | 42 | 1 | 1 | 0 | Vaginal  | Endometritis | China | Female |
| D065 | 71 | 5 | 3 | 2 | Vaginal  | Endometritis | China | Female |
| D066 | 50 | 3 | 2 | 1 | Vaginal  | Endometritis | China | Female |
| D067 | 49 | 1 | 1 | 0 | Vaginal  | Endometritis | China | Female |
| D068 | -  | - | - | 0 | -        | Endometritis | China | Female |
| D069 | 60 | 1 | 1 | 0 | Csection | Endometritis | China | Female |
| D070 | 55 | 1 | 1 | 0 | Csection | Endometritis | China | Female |
| D071 | 57 | 5 | 2 | 3 | Csection | Endometritis | China | Female |

|      |    |   |   |   |         |              |       |        |
|------|----|---|---|---|---------|--------------|-------|--------|
| D072 | 58 | 3 | 1 | 2 | Vaginal | Endometritis | China | Female |
|------|----|---|---|---|---------|--------------|-------|--------|

**Supplementary Table 2 Medical records of 1,612 women used to analysis correlation between endometritis with clinical factors.**

| Individual | Age | # pregnancy | # delivery | # abortion | Diagnosis    | Hospital   | Country | Sex    |
|------------|-----|-------------|------------|------------|--------------|------------|---------|--------|
| D1         | 27  | 1           | 0          | 0          | Endometritis | Hospital 1 | China   | Female |
| D2         | 38  | 3           | 1          | 2          | Endometritis | Hospital 1 | China   | Female |
| D3         | 38  | 2           | 0          | 2          | Endometritis | Hospital 1 | China   | Female |
| D4         | 31  | 5           | 0          | 4          | Endometritis | Hospital 1 | China   | Female |
| D5         | 35  | 1           | 0          | 1          | Endometritis | Hospital 1 | China   | Female |
| D6         | 38  | 3           | 1          | 1          | Endometritis | Hospital 1 | China   | Female |
| D7         | 36  | 1           | 0          | 1          | Endometritis | Hospital 1 | China   | Female |
| D8         | 28  | 2           | 0          | 2          | Endometritis | Hospital 1 | China   | Female |
| D9         | 35  | 3           | 1          | 1          | Endometritis | Hospital 1 | China   | Female |
| D10        | 35  | 2           | 1          | 0          | Endometritis | Hospital 1 | China   | Female |
| D11        | 27  | 2           | 0          | 1          | Endometritis | Hospital 1 | China   | Female |
| D12        | 35  | 3           | 0          | 2          | Endometritis | Hospital 1 | China   | Female |
| D13        | 37  | 1           | 0          | 0          | Endometritis | Hospital 1 | China   | Female |
| D14        | 37  | 3           | 0          | 2          | Endometritis | Hospital 1 | China   | Female |
| D15        | 37  | 1           | 0          | 0          | Endometritis | Hospital 1 | China   | Female |
| D16        | 36  | 2           | 0          | 2          | Endometritis | Hospital 1 | China   | Female |
| D17        | 37  | 1           | 1          | 0          | Endometritis | Hospital 1 | China   | Female |
| D18        | 32  | 2           | 1          | 1          | Endometritis | Hospital 1 | China   | Female |
| D19        | 37  | 2           | 0          | 1          | Endometritis | Hospital 1 | China   | Female |
| D20        | 34  | 2           | 1          | 1          | Endometritis | Hospital 1 | China   | Female |
| D21        | 35  | 1           | 0          | 0          | Endometritis | Hospital 1 | China   | Female |

|     |    |   |   |   |              |            |       |        |
|-----|----|---|---|---|--------------|------------|-------|--------|
| D22 | 37 | 4 | 2 | 1 | Endometritis | Hospital 1 | China | Female |
| D23 | 32 | 1 | 0 | 0 | Endometritis | Hospital 1 | China | Female |
| D24 | 34 | 3 | 0 | 2 | Endometritis | Hospital 1 | China | Female |
| D25 | 37 | 1 | 1 | 0 | Endometritis | Hospital 1 | China | Female |
| D26 | 35 | 1 | 0 | 0 | Endometritis | Hospital 1 | China | Female |
| D27 | 37 | 2 | 0 | 1 | Endometritis | Hospital 1 | China | Female |
| D28 | 35 | 5 | 0 | 2 | Endometritis | Hospital 1 | China | Female |
| D29 | 37 | 3 | 0 | 1 | Endometritis | Hospital 1 | China | Female |
| D30 | 37 | 1 | 0 | 0 | Endometritis | Hospital 1 | China | Female |
| D31 | 33 | 1 | 0 | 0 | Endometritis | Hospital 1 | China | Female |
| D32 | 37 | 1 | 0 | 1 | Endometritis | Hospital 1 | China | Female |
| D33 | 36 | 1 | 0 | 0 | Endometritis | Hospital 1 | China | Female |
| D34 | 34 | 2 | 1 | 1 | Endometritis | Hospital 1 | China | Female |
| D35 | 39 | 2 | 2 | 0 | Endometritis | Hospital 1 | China | Female |
| D36 | 36 | 1 | 0 | 0 | Endometritis | Hospital 1 | China | Female |
| D37 | 36 | 3 | 0 | 2 | Endometritis | Hospital 1 | China | Female |
| D38 | 37 | 1 | 0 | 0 | Endometritis | Hospital 1 | China | Female |
| D39 | 35 | 4 | 0 | 2 | Endometritis | Hospital 1 | China | Female |
| D40 | 35 | 1 | 0 | 0 | Endometritis | Hospital 1 | China | Female |
| D41 | 35 | 3 | 1 | 2 | Endometritis | Hospital 1 | China | Female |
| D42 | 33 | 2 | 0 | 1 | Endometritis | Hospital 1 | China | Female |
| D43 | 34 | 1 | 1 | 0 | Endometritis | Hospital 1 | China | Female |
| D44 | 36 | 1 | 1 | 0 | Endometritis | Hospital 1 | China | Female |
| D45 | 37 | 1 | 0 | 0 | Endometritis | Hospital 1 | China | Female |
| D46 | 33 | 3 | 0 | 0 | Endometritis | Hospital 1 | China | Female |

|     |    |   |   |   |              |            |       |        |
|-----|----|---|---|---|--------------|------------|-------|--------|
| D47 | 35 | 2 | 0 | 1 | Endometritis | Hospital 1 | China | Female |
| D48 | 33 | 1 | 0 | 0 | Endometritis | Hospital 1 | China | Female |
| D49 | 37 | 1 | 0 | 0 | Endometritis | Hospital 1 | China | Female |
| D50 | 35 | 2 | 0 | 2 | Endometritis | Hospital 1 | China | Female |
| D51 | 35 | 4 | 1 | 2 | Endometritis | Hospital 1 | China | Female |
| D52 | 33 | 1 | 0 | 0 | Endometritis | Hospital 1 | China | Female |
| D53 | 37 | 1 | 0 | 0 | Endometritis | Hospital 1 | China | Female |
| D54 | 32 | 2 | 0 | 2 | Endometritis | Hospital 1 | China | Female |
| D55 | 37 | 4 | 0 | 3 | Endometritis | Hospital 1 | China | Female |
| D56 | 34 | 2 | 1 | 1 | Endometritis | Hospital 1 | China | Female |
| D57 | 33 | 3 | 1 | 2 | Endometritis | Hospital 1 | China | Female |
| D58 | 35 | 1 | 0 | 0 | Endometritis | Hospital 1 | China | Female |
| D59 | 26 | 1 | 0 | 0 | Endometritis | Hospital 1 | China | Female |
| D60 | 36 | 1 | 0 | 0 | Endometritis | Hospital 1 | China | Female |
| D61 | 36 | 6 | 1 | 4 | Endometritis | Hospital 1 | China | Female |
| D62 | 37 | 2 | 0 | 1 | Endometritis | Hospital 1 | China | Female |
| D63 | 36 | 1 | 1 | 0 | Endometritis | Hospital 1 | China | Female |
| D64 | 38 | 2 | 0 | 0 | Endometritis | Hospital 1 | China | Female |
| D65 | 36 | 1 | 0 | 0 | Endometritis | Hospital 1 | China | Female |
| D66 | 36 | 1 | 0 | 0 | Endometritis | Hospital 1 | China | Female |
| D67 | 36 | 1 | 0 | 0 | Endometritis | Hospital 1 | China | Female |
| D68 | 37 | 2 | 1 | 0 | Endometritis | Hospital 1 | China | Female |
| D69 | 33 | 1 | 0 | 0 | Endometritis | Hospital 1 | China | Female |
| D70 | 36 | 2 | 0 | 2 | Endometritis | Hospital 1 | China | Female |
| D71 | 37 | 4 | 0 | 2 | Endometritis | Hospital 1 | China | Female |

|     |    |   |   |   |              |            |       |        |
|-----|----|---|---|---|--------------|------------|-------|--------|
| D72 | 26 | 2 | 0 | 1 | Endometritis | Hospital 1 | China | Female |
| D73 | 33 | 1 | 0 | 0 | Endometritis | Hospital 1 | China | Female |
| D74 | 37 | 3 | 1 | 1 | Endometritis | Hospital 1 | China | Female |
| D75 | 37 | 2 | 0 | 1 | Endometritis | Hospital 1 | China | Female |
| D76 | 37 | 1 | 0 | 0 | Endometritis | Hospital 1 | China | Female |
| D77 | 36 | 3 | 1 | 2 | Endometritis | Hospital 1 | China | Female |
| D78 | 37 | 1 | 0 | 0 | Endometritis | Hospital 1 | China | Female |
| D79 | 37 | 2 | 0 | 1 | Endometritis | Hospital 1 | China | Female |
| D80 | 36 | 1 | 0 | 0 | Endometritis | Hospital 1 | China | Female |
| D81 | 35 | 2 | 1 | 0 | Endometritis | Hospital 1 | China | Female |
| D82 | 37 | 5 | 2 | 2 | Endometritis | Hospital 1 | China | Female |
| D83 | 30 | 2 | 0 | 0 | Endometritis | Hospital 1 | China | Female |
| D84 | 37 | 2 | 1 | 1 | Endometritis | Hospital 1 | China | Female |
| D85 | 33 | 1 | 0 | 0 | Endometritis | Hospital 1 | China | Female |
| D86 | 36 | 1 | 1 | 0 | Endometritis | Hospital 1 | China | Female |
| D87 | 34 | 4 | 1 | 2 | Endometritis | Hospital 1 | China | Female |
| D88 | 35 | 2 | 1 | 0 | Endometritis | Hospital 1 | China | Female |
| D89 | 37 | 4 | 0 | 3 | Endometritis | Hospital 1 | China | Female |
| D90 | 34 | 1 | 0 | 0 | Endometritis | Hospital 1 | China | Female |
| D91 | 33 | 3 | 0 | 0 | Endometritis | Hospital 1 | China | Female |
| D92 | 38 | 1 | 0 | 0 | Endometritis | Hospital 1 | China | Female |
| D93 | 37 | 1 | 0 | 0 | Endometritis | Hospital 1 | China | Female |
| D94 | 36 | 2 | 0 | 1 | Endometritis | Hospital 1 | China | Female |
| D95 | 34 | 2 | 0 | 1 | Endometritis | Hospital 1 | China | Female |
| D96 | 37 | 1 | 0 | 0 | Endometritis | Hospital 1 | China | Female |



|      |    |   |   |   |              |            |       |        |
|------|----|---|---|---|--------------|------------|-------|--------|
| D97  | 35 | 2 | 0 | 1 | Endometritis | Hospital 1 | China | Female |
| D98  | 36 | 1 | 1 | 0 | Endometritis | Hospital 1 | China | Female |
| D99  | 37 | 1 | 0 | 0 | Endometritis | Hospital 1 | China | Female |
| D100 | 35 | 3 | 1 | 0 | Endometritis | Hospital 1 | China | Female |
| D101 | 34 | 1 | 0 | 0 | Endometritis | Hospital 1 | China | Female |
| D102 | 34 | 1 | 0 | 0 | Endometritis | Hospital 1 | China | Female |
| D103 | 37 | 1 | 1 | 0 | Endometritis | Hospital 1 | China | Female |
| D104 | 34 | 2 | 1 | 1 | Endometritis | Hospital 1 | China | Female |
| D105 | 35 | 3 | 2 | 1 | Endometritis | Hospital 1 | China | Female |
| D106 | 37 | 1 | 0 | 0 | Endometritis | Hospital 1 | China | Female |
| D107 | 35 | 1 | 0 | 0 | Endometritis | Hospital 1 | China | Female |
| D108 | 36 | 1 | 0 | 0 | Endometritis | Hospital 1 | China | Female |
| D109 | 32 | 2 | 1 | 0 | Endometritis | Hospital 1 | China | Female |
| D110 | 36 | 2 | 0 | 1 | Endometritis | Hospital 1 | China | Female |
| D111 | 37 | 2 | 0 | 0 | Endometritis | Hospital 1 | China | Female |
| D112 | 35 | 1 | 0 | 0 | Endometritis | Hospital 1 | China | Female |
| D113 | 36 | 1 | 0 | 0 | Endometritis | Hospital 1 | China | Female |
| D114 | 35 | 2 | 0 | 0 | Endometritis | Hospital 1 | China | Female |
| D115 | 34 | 5 | 1 | 1 | Endometritis | Hospital 1 | China | Female |
| D116 | 37 | 1 | 1 | 0 | Endometritis | Hospital 1 | China | Female |
| D117 | 36 | 2 | 1 | 0 | Endometritis | Hospital 1 | China | Female |
| D118 | 35 | 3 | 0 | 1 | Endometritis | Hospital 1 | China | Female |
| D119 | 37 | 2 | 0 | 1 | Endometritis | Hospital 1 | China | Female |
| D120 | 35 | 1 | 0 | 0 | Endometritis | Hospital 1 | China | Female |
| D121 | 34 | 2 | 1 | 0 | Endometritis | Hospital 1 | China | Female |

|      |    |   |   |   |              |            |       |        |
|------|----|---|---|---|--------------|------------|-------|--------|
| D122 | 37 | 1 | 1 | 0 | Endometritis | Hospital 1 | China | Female |
| D123 | 37 | 1 | 0 | 1 | Endometritis | Hospital 1 | China | Female |
| D124 | 29 | 2 | 1 | 1 | Endometritis | Hospital 1 | China | Female |
| D125 | 37 | 4 | 1 | 3 | Endometritis | Hospital 1 | China | Female |
| D126 | 35 | 1 | 0 | 1 | Endometritis | Hospital 1 | China | Female |
| D127 | 37 | 1 | 1 | 0 | Endometritis | Hospital 1 | China | Female |
| D128 | 37 | 2 | 0 | 1 | Endometritis | Hospital 1 | China | Female |
| D129 | 32 | 1 | 0 | 0 | Endometritis | Hospital 1 | China | Female |
| D130 | 36 | 2 | 0 | 2 | Endometritis | Hospital 1 | China | Female |
| D131 | 37 | 3 | 0 | 2 | Endometritis | Hospital 1 | China | Female |
| D132 | 37 | 2 | 0 | 1 | Endometritis | Hospital 1 | China | Female |
| D133 | 36 | 4 | 1 | 2 | Endometritis | Hospital 1 | China | Female |
| D134 | 37 | 1 | 0 | 0 | Endometritis | Hospital 1 | China | Female |
| D135 | 36 | 6 | 0 | 4 | Endometritis | Hospital 1 | China | Female |
| D136 | 37 | 1 | 0 | 0 | Endometritis | Hospital 1 | China | Female |
| D137 | 35 | 1 | 0 | 0 | Endometritis | Hospital 1 | China | Female |
| D138 | 38 | 1 | 0 | 0 | Endometritis | Hospital 1 | China | Female |
| D139 | 37 | 2 | 2 | 0 | Endometritis | Hospital 1 | China | Female |
| D140 | 36 | 1 | 0 | 0 | Endometritis | Hospital 1 | China | Female |
| D141 | 38 | 1 | 1 | 0 | Endometritis | Hospital 1 | China | Female |
| D142 | 33 | 2 | 2 | 0 | Endometritis | Hospital 1 | China | Female |
| D143 | 35 | 1 | 0 | 0 | Endometritis | Hospital 1 | China | Female |
| D144 | 37 | 1 | 1 | 0 | Endometritis | Hospital 1 | China | Female |
| D145 | 36 | 1 | 1 | 0 | Endometritis | Hospital 1 | China | Female |
| D146 | 35 | 1 | 0 | 0 | Endometritis | Hospital 1 | China | Female |

|      |    |   |   |   |              |            |       |        |
|------|----|---|---|---|--------------|------------|-------|--------|
| D147 | 34 | 2 | 0 | 2 | Endometritis | Hospital 1 | China | Female |
| D148 | 37 | 1 | 1 | 0 | Endometritis | Hospital 1 | China | Female |
| D149 | 37 | 1 | 0 | 0 | Endometritis | Hospital 1 | China | Female |
| D150 | 37 | 1 | 0 | 0 | Endometritis | Hospital 1 | China | Female |
| D151 | 33 | 1 | 0 | 0 | Endometritis | Hospital 1 | China | Female |
| D152 | 37 | 3 | 0 | 2 | Endometritis | Hospital 1 | China | Female |
| D153 | 38 | 1 | 0 | 0 | Endometritis | Hospital 1 | China | Female |
| D154 | 36 | 1 | 0 | 0 | Endometritis | Hospital 1 | China | Female |
| D155 | 34 | 2 | 1 | 0 | Endometritis | Hospital 1 | China | Female |
| D156 | 37 | 1 | 1 | 0 | Endometritis | Hospital 1 | China | Female |
| D157 | 36 | 1 | 0 | 0 | Endometritis | Hospital 1 | China | Female |
| D158 | 37 | 1 | 0 | 0 | Endometritis | Hospital 1 | China | Female |
| D159 | 37 | 4 | 0 | 3 | Endometritis | Hospital 1 | China | Female |
| D160 | 33 | 1 | 0 | 0 | Endometritis | Hospital 1 | China | Female |
| D161 | 35 | 6 | 1 | 4 | Endometritis | Hospital 1 | China | Female |
| D162 | 35 | 3 | 2 | 1 | Endometritis | Hospital 1 | China | Female |
| D163 | 33 | 1 | 0 | 0 | Endometritis | Hospital 1 | China | Female |
| D164 | 35 | 2 | 0 | 1 | Endometritis | Hospital 1 | China | Female |
| D165 | 37 | 1 | 0 | 0 | Endometritis | Hospital 1 | China | Female |
| D166 | 36 | 3 | 0 | 3 | Endometritis | Hospital 1 | China | Female |
| D167 | 37 | 2 | 1 | 1 | Endometritis | Hospital 1 | China | Female |
| D168 | 37 | 1 | 0 | 0 | Endometritis | Hospital 1 | China | Female |
| D169 | 32 | 1 | 0 | 0 | Endometritis | Hospital 1 | China | Female |
| D170 | 36 | 2 | 0 | 2 | Endometritis | Hospital 1 | China | Female |
| D171 | 36 | 2 | 0 | 1 | Endometritis | Hospital 1 | China | Female |

|      |    |   |   |   |              |            |       |        |
|------|----|---|---|---|--------------|------------|-------|--------|
| D172 | 36 | 3 | 1 | 0 | Endometritis | Hospital 1 | China | Female |
| D173 | 28 | 2 | 0 | 0 | Endometritis | Hospital 1 | China | Female |
| D174 | 37 | 1 | 0 | 0 | Endometritis | Hospital 1 | China | Female |
| D175 | 37 | 1 | 1 | 0 | Endometritis | Hospital 1 | China | Female |
| D176 | 36 | 1 | 0 | 0 | Endometritis | Hospital 1 | China | Female |
| D177 | 37 | 1 | 1 | 0 | Endometritis | Hospital 1 | China | Female |
| D178 | 37 | 2 | 0 | 1 | Endometritis | Hospital 1 | China | Female |
| D179 | 37 | 1 | 0 | 0 | Endometritis | Hospital 1 | China | Female |
| D180 | 34 | 1 | 0 | 0 | Endometritis | Hospital 1 | China | Female |
| D181 | 37 | 4 | 0 | 2 | Endometritis | Hospital 1 | China | Female |
| D182 | 36 | 1 | 0 | 0 | Endometritis | Hospital 1 | China | Female |
| D183 | 33 | 3 | 0 | 0 | Endometritis | Hospital 1 | China | Female |
| D184 | 32 | 1 | 0 | 0 | Endometritis | Hospital 1 | China | Female |
| D185 | 36 | 1 | 0 | 0 | Endometritis | Hospital 1 | China | Female |
| D186 | 36 | 2 | 1 | 0 | Endometritis | Hospital 1 | China | Female |
| D187 | 37 | 1 | 0 | 0 | Endometritis | Hospital 1 | China | Female |
| D188 | 35 | 1 | 1 | 0 | Endometritis | Hospital 1 | China | Female |
| D189 | 36 | 3 | 1 | 0 | Endometritis | Hospital 1 | China | Female |
| D190 | 35 | 1 | 0 | 0 | Endometritis | Hospital 1 | China | Female |
| D191 | 35 | 1 | 1 | 0 | Endometritis | Hospital 1 | China | Female |
| D192 | 38 | 2 | 1 | 1 | Endometritis | Hospital 1 | China | Female |
| D193 | 37 | 2 | 0 | 1 | Endometritis | Hospital 1 | China | Female |
| D194 | 37 | 1 | 0 | 0 | Endometritis | Hospital 1 | China | Female |
| D195 | 37 | 5 | 1 | 4 | Endometritis | Hospital 1 | China | Female |
| D196 | 36 | 3 | 0 | 1 | Endometritis | Hospital 1 | China | Female |

|      |    |   |   |   |              |            |       |        |
|------|----|---|---|---|--------------|------------|-------|--------|
| D197 | 35 | 2 | 0 | 1 | Endometritis | Hospital 1 | China | Female |
| D198 | 37 | 1 | 0 | 0 | Endometritis | Hospital 1 | China | Female |
| D199 | 37 | 1 | 0 | 0 | Endometritis | Hospital 1 | China | Female |
| D200 | 37 | 2 | 0 | 1 | Endometritis | Hospital 1 | China | Female |
| D201 | 37 | 1 | 0 | 0 | Endometritis | Hospital 1 | China | Female |
| D202 | 37 | 1 | 0 | 0 | Endometritis | Hospital 1 | China | Female |
| D203 | 37 | 4 | 0 | 3 | Endometritis | Hospital 1 | China | Female |
| D204 | 35 | 1 | 0 | 0 | Endometritis | Hospital 1 | China | Female |
| D205 | 34 | 2 | 0 | 0 | Endometritis | Hospital 1 | China | Female |
| D206 | 35 | 1 | 0 | 0 | Endometritis | Hospital 1 | China | Female |
| D207 | 32 | 3 | 1 | 2 | Endometritis | Hospital 1 | China | Female |
| D208 | 37 | 4 | 0 | 3 | Endometritis | Hospital 1 | China | Female |
| D209 | 39 | 2 | 0 | 1 | Endometritis | Hospital 1 | China | Female |
| D210 | 30 | 1 | 0 | 0 | Endometritis | Hospital 1 | China | Female |
| D211 | 37 | 1 | 0 | 0 | Endometritis | Hospital 1 | China | Female |
| D212 | 37 | 1 | 1 | 0 | Endometritis | Hospital 1 | China | Female |
| D213 | 37 | 2 | 1 | 1 | Endometritis | Hospital 1 | China | Female |
| D214 | 37 | 1 | 1 | 0 | Endometritis | Hospital 1 | China | Female |
| D215 | 33 | 3 | 0 | 2 | Endometritis | Hospital 1 | China | Female |
| D216 | 37 | 1 | 0 | 0 | Endometritis | Hospital 1 | China | Female |
| D217 | 37 | 1 | 0 | 0 | Endometritis | Hospital 1 | China | Female |
| D218 | 37 | 1 | 0 | 0 | Endometritis | Hospital 1 | China | Female |
| D219 | 37 | 6 | 0 | 4 | Endometritis | Hospital 1 | China | Female |
| D220 | 35 | 1 | 1 | 0 | Endometritis | Hospital 1 | China | Female |
| D221 | 31 | 1 | 0 | 0 | Endometritis | Hospital 1 | China | Female |

|      |    |   |   |   |              |            |       |        |
|------|----|---|---|---|--------------|------------|-------|--------|
| D222 | 35 | 4 | 0 | 3 | Endometritis | Hospital 1 | China | Female |
| D223 | 29 | 1 | 0 | 0 | Endometritis | Hospital 1 | China | Female |
| D224 | 36 | 2 | 0 | 2 | Endometritis | Hospital 1 | China | Female |
| D225 | 32 | 2 | 2 | 0 | Endometritis | Hospital 1 | China | Female |
| D226 | 33 | 1 | 1 | 0 | Endometritis | Hospital 1 | China | Female |
| D227 | 29 | 3 | 0 | 1 | Endometritis | Hospital 1 | China | Female |
| D228 | 35 | 4 | 1 | 2 | Endometritis | Hospital 1 | China | Female |
| D229 | 34 | 2 | 0 | 0 | Endometritis | Hospital 1 | China | Female |
| D230 | 37 | 2 | 0 | 0 | Endometritis | Hospital 1 | China | Female |
| D231 | 37 | 1 | 0 | 0 | Endometritis | Hospital 1 | China | Female |
| D232 | 30 | 1 | 0 | 0 | Endometritis | Hospital 1 | China | Female |
| D233 | 33 | 1 | 0 | 0 | Endometritis | Hospital 1 | China | Female |
| D234 | 36 | 2 | 0 | 1 | Endometritis | Hospital 1 | China | Female |
| D235 | 32 | 1 | 1 | 0 | Endometritis | Hospital 1 | China | Female |
| D236 | 36 | 5 | 1 | 3 | Endometritis | Hospital 1 | China | Female |
| D237 | 37 | 2 | 0 | 1 | Endometritis | Hospital 1 | China | Female |
| D238 | 34 | 4 | 0 | 2 | Endometritis | Hospital 1 | China | Female |
| D239 | 34 | 1 | 0 | 0 | Endometritis | Hospital 1 | China | Female |
| D240 | 38 | 3 | 0 | 0 | Endometritis | Hospital 1 | China | Female |
| D241 | 36 | 1 | 1 | 0 | Endometritis | Hospital 1 | China | Female |
| D242 | 37 | 2 | 0 | 0 | Endometritis | Hospital 1 | China | Female |
| D243 | 36 | 1 | 1 | 0 | Endometritis | Hospital 1 | China | Female |
| D244 | 37 | 2 | 0 | 1 | Endometritis | Hospital 1 | China | Female |
| D245 | 37 | 1 | 0 | 0 | Endometritis | Hospital 1 | China | Female |
| D246 | 33 | 2 | 0 | 0 | Endometritis | Hospital 1 | China | Female |

|      |    |   |   |   |              |            |       |        |
|------|----|---|---|---|--------------|------------|-------|--------|
| D247 | 32 | 6 | 0 | 4 | Endometritis | Hospital 1 | China | Female |
| D248 | 37 | 1 | 1 | 0 | Endometritis | Hospital 1 | China | Female |
| D249 | 34 | 3 | 1 | 2 | Endometritis | Hospital 1 | China | Female |
| D250 | 37 | 3 | 0 | 1 | Endometritis | Hospital 1 | China | Female |
| D251 | 35 | 1 | 1 | 0 | Endometritis | Hospital 1 | China | Female |
| D252 | 34 | 2 | 2 | 0 | Endometritis | Hospital 1 | China | Female |
| D253 | 35 | 1 | 0 | 0 | Endometritis | Hospital 1 | China | Female |
| D254 | 37 | 2 | 0 | 0 | Endometritis | Hospital 1 | China | Female |
| D255 | 35 | 2 | 0 | 1 | Endometritis | Hospital 1 | China | Female |
| D256 | 38 | 5 | 1 | 4 | Endometritis | Hospital 1 | China | Female |
| D257 | 38 | 1 | 0 | 0 | Endometritis | Hospital 1 | China | Female |
| D258 | 33 | 4 | 0 | 2 | Endometritis | Hospital 1 | China | Female |
| D259 | 37 | 2 | 0 | 0 | Endometritis | Hospital 1 | China | Female |
| D260 | 34 | 1 | 1 | 0 | Endometritis | Hospital 1 | China | Female |
| D261 | 36 | 1 | 0 | 0 | Endometritis | Hospital 1 | China | Female |
| D262 | 35 | 1 | 1 | 0 | Endometritis | Hospital 1 | China | Female |
| D263 | 37 | 1 | 1 | 0 | Endometritis | Hospital 1 | China | Female |
| D264 | 37 | 1 | 0 | 0 | Endometritis | Hospital 1 | China | Female |
| D265 | 31 | 2 | 0 | 0 | Endometritis | Hospital 1 | China | Female |
| D266 | 37 | 1 | 0 | 0 | Endometritis | Hospital 1 | China | Female |
| D267 | 37 | 1 | 0 | 0 | Endometritis | Hospital 1 | China | Female |
| D268 | 34 | 1 | 1 | 0 | Endometritis | Hospital 1 | China | Female |
| D269 | 33 | 2 | 1 | 0 | Endometritis | Hospital 1 | China | Female |
| D270 | 38 | 3 | 0 | 0 | Endometritis | Hospital 1 | China | Female |
| D271 | 35 | 3 | 0 | 2 | Endometritis | Hospital 1 | China | Female |

|      |    |   |   |   |              |            |       |        |
|------|----|---|---|---|--------------|------------|-------|--------|
| D272 | 36 | 1 | 1 | 0 | Endometritis | Hospital 1 | China | Female |
| D273 | 36 | 1 | 1 | 0 | Endometritis | Hospital 1 | China | Female |
| D274 | 37 | 2 | 0 | 1 | Endometritis | Hospital 1 | China | Female |
| D275 | 35 | 2 | 2 | 0 | Endometritis | Hospital 1 | China | Female |
| D276 | 37 | 1 | 0 | 0 | Endometritis | Hospital 1 | China | Female |
| D277 | 38 | 3 | 1 | 0 | Endometritis | Hospital 1 | China | Female |
| D278 | 37 | 2 | 0 | 1 | Endometritis | Hospital 1 | China | Female |
| D279 | 36 | 1 | 1 | 0 | Endometritis | Hospital 1 | China | Female |
| D280 | 35 | 1 | 1 | 0 | Endometritis | Hospital 1 | China | Female |
| D281 | 37 | 3 | 0 | 2 | Endometritis | Hospital 1 | China | Female |
| D282 | 36 | 2 | 1 | 1 | Endometritis | Hospital 1 | China | Female |
| D283 | 36 | 1 | 0 | 0 | Endometritis | Hospital 1 | China | Female |
| D284 | 36 | 3 | 0 | 0 | Endometritis | Hospital 1 | China | Female |
| D285 | 37 | 1 | 1 | 0 | Endometritis | Hospital 1 | China | Female |
| D286 | 37 | 1 | 1 | 0 | Endometritis | Hospital 1 | China | Female |
| D287 | 35 | 1 | 0 | 0 | Endometritis | Hospital 1 | China | Female |
| D288 | 36 | 1 | 1 | 0 | Endometritis | Hospital 1 | China | Female |
| D289 | 38 | 2 | 1 | 0 | Endometritis | Hospital 1 | China | Female |
| D290 | 31 | 2 | 0 | 1 | Endometritis | Hospital 1 | China | Female |
| D291 | 31 | 1 | 0 | 0 | Endometritis | Hospital 1 | China | Female |
| D292 | 37 | 3 | 0 | 2 | Endometritis | Hospital 1 | China | Female |
| D293 | 34 | 2 | 0 | 0 | Endometritis | Hospital 1 | China | Female |
| D294 | 37 | 4 | 1 | 3 | Endometritis | Hospital 1 | China | Female |
| D295 | 32 | 2 | 0 | 1 | Endometritis | Hospital 1 | China | Female |
| D296 | 37 | 1 | 0 | 0 | Endometritis | Hospital 1 | China | Female |



|      |    |   |   |   |              |            |       |        |
|------|----|---|---|---|--------------|------------|-------|--------|
| D297 | 38 | 4 | 0 | 3 | Endometritis | Hospital 1 | China | Female |
| D298 | 38 | 3 | 0 | 2 | Endometritis | Hospital 1 | China | Female |
| D299 | 37 | 1 | 0 | 0 | Endometritis | Hospital 1 | China | Female |
| D300 | 31 | 1 | 0 | 0 | Endometritis | Hospital 1 | China | Female |
| D301 | 36 | 3 | 2 | 1 | Endometritis | Hospital 1 | China | Female |
| D302 | 38 | 2 | 0 | 0 | Endometritis | Hospital 1 | China | Female |
| D303 | 37 | 1 | 0 | 0 | Endometritis | Hospital 1 | China | Female |
| D304 | 37 | 3 | 2 | 2 | Endometritis | Hospital 1 | China | Female |
| D305 | 38 | 2 | 1 | 1 | Endometritis | Hospital 1 | China | Female |
| D306 | 38 | 1 | 0 | 0 | Endometritis | Hospital 1 | China | Female |
| D307 | 33 | 1 | 0 | 0 | Endometritis | Hospital 1 | China | Female |
| D308 | 37 | 2 | 1 | 1 | Endometritis | Hospital 1 | China | Female |
| D309 | 37 | 1 | 1 | 0 | Endometritis | Hospital 1 | China | Female |
| D310 | 32 | 1 | 0 | 0 | Endometritis | Hospital 1 | China | Female |
| D311 | 26 | 3 | 0 | 2 | Endometritis | Hospital 1 | China | Female |
| D312 | 37 | 2 | 1 | 1 | Endometritis | Hospital 1 | China | Female |
| D313 | 34 | 1 | 0 | 0 | Endometritis | Hospital 1 | China | Female |
| D314 | 36 | 1 | 1 | 0 | Endometritis | Hospital 1 | China | Female |
| D315 | 37 | 1 | 0 | 0 | Endometritis | Hospital 1 | China | Female |
| D316 | 37 | 1 | 0 | 0 | Endometritis | Hospital 1 | China | Female |
| D317 | 37 | 2 | 0 | 2 | Endometritis | Hospital 1 | China | Female |
| D318 | 36 | 1 | 0 | 0 | Endometritis | Hospital 1 | China | Female |
| D319 | 36 | 2 | 0 | 0 | Endometritis | Hospital 1 | China | Female |
| D320 | 27 | 6 | 0 | 4 | Endometritis | Hospital 1 | China | Female |
| D321 | 35 | 2 | 0 | 1 | Endometritis | Hospital 1 | China | Female |

|      |    |   |   |   |              |            |       |        |
|------|----|---|---|---|--------------|------------|-------|--------|
| D322 | 31 | 1 | 1 | 0 | Endometritis | Hospital 1 | China | Female |
| D323 | 37 | 2 | 0 | 1 | Endometritis | Hospital 1 | China | Female |
| D324 | 37 | 1 | 1 | 0 | Endometritis | Hospital 1 | China | Female |
| D325 | 35 | 2 | 0 | 1 | Endometritis | Hospital 1 | China | Female |
| D326 | 29 | 1 | 1 | 0 | Endometritis | Hospital 1 | China | Female |
| D327 | 37 | 1 | 1 | 0 | Endometritis | Hospital 1 | China | Female |
| D328 | 37 | 1 | 1 | 0 | Endometritis | Hospital 1 | China | Female |
| D329 | 39 | 1 | 0 | 0 | Endometritis | Hospital 1 | China | Female |
| D330 | 37 | 1 | 0 | 0 | Endometritis | Hospital 1 | China | Female |
| D331 | 32 | 3 | 0 | 1 | Endometritis | Hospital 1 | China | Female |
| D332 | 36 | 2 | 0 | 1 | Endometritis | Hospital 1 | China | Female |
| D333 | 30 | 1 | 1 | 0 | Endometritis | Hospital 1 | China | Female |
| D334 | 36 | 1 | 0 | 0 | Endometritis | Hospital 1 | China | Female |
| D335 | 35 | 2 | 0 | 1 | Endometritis | Hospital 1 | China | Female |
| D336 | 37 | 2 | 0 | 1 | Endometritis | Hospital 1 | China | Female |
| D337 | 36 | 1 | 0 | 0 | Endometritis | Hospital 1 | China | Female |
| D338 | 36 | 3 | 1 | 2 | Endometritis | Hospital 1 | China | Female |
| D339 | 37 | 2 | 1 | 1 | Endometritis | Hospital 1 | China | Female |
| D340 | 31 | 1 | 1 | 0 | Endometritis | Hospital 1 | China | Female |
| D341 | 37 | 3 | 2 | 1 | Endometritis | Hospital 1 | China | Female |
| D342 | 34 | 1 | 1 | 0 | Endometritis | Hospital 1 | China | Female |
| D343 | 35 | 1 | 0 | 0 | Endometritis | Hospital 1 | China | Female |
| D344 | 32 | 2 | 0 | 1 | Endometritis | Hospital 1 | China | Female |
| D345 | 37 | 2 | 1 | 1 | Endometritis | Hospital 1 | China | Female |
| D346 | 35 | 1 | 1 | 0 | Endometritis | Hospital 1 | China | Female |

|      |    |   |   |   |              |            |       |        |
|------|----|---|---|---|--------------|------------|-------|--------|
| D347 | 36 | 2 | 1 | 1 | Endometritis | Hospital 1 | China | Female |
| D348 | 35 | 1 | 0 | 0 | Endometritis | Hospital 1 | China | Female |
| D349 | 31 | 1 | 0 | 1 | Endometritis | Hospital 1 | China | Female |
| D350 | 37 | 2 | 0 | 0 | Endometritis | Hospital 1 | China | Female |
| D351 | 35 | 2 | 0 | 2 | Endometritis | Hospital 1 | China | Female |
| D352 | 36 | 3 | 0 | 3 | Endometritis | Hospital 1 | China | Female |
| D353 | 36 | 2 | 0 | 1 | Endometritis | Hospital 1 | China | Female |
| D354 | 37 | 1 | 0 | 1 | Endometritis | Hospital 1 | China | Female |
| D355 | 37 | 2 | 1 | 1 | Endometritis | Hospital 1 | China | Female |
| D356 | 32 | 6 | 1 | 4 | Endometritis | Hospital 1 | China | Female |
| D357 | 37 | 1 | 0 | 0 | Endometritis | Hospital 1 | China | Female |
| D358 | 36 | 1 | 1 | 0 | Endometritis | Hospital 1 | China | Female |
| D359 | 37 | 1 | 0 | 0 | Endometritis | Hospital 1 | China | Female |
| D360 | 33 | 1 | 0 | 1 | Endometritis | Hospital 1 | China | Female |
| D361 | 35 | 3 | 1 | 2 | Endometritis | Hospital 1 | China | Female |
| D362 | 37 | 2 | 0 | 1 | Endometritis | Hospital 1 | China | Female |
| D363 | 36 | 1 | 0 | 1 | Endometritis | Hospital 1 | China | Female |
| D364 | 33 | 5 | 1 | 3 | Endometritis | Hospital 1 | China | Female |
| D365 | 37 | 1 | 0 | 0 | Endometritis | Hospital 1 | China | Female |
| D366 | 35 | 2 | 0 | 1 | Endometritis | Hospital 1 | China | Female |
| D367 | 38 | 1 | 0 | 0 | Endometritis | Hospital 1 | China | Female |
| D368 | 38 | 2 | 0 | 1 | Endometritis | Hospital 1 | China | Female |
| D369 | 37 | 2 | 0 | 0 | Endometritis | Hospital 1 | China | Female |
| D370 | 39 | 2 | 0 | 1 | Endometritis | Hospital 1 | China | Female |
| D371 | 35 | 2 | 0 | 0 | Endometritis | Hospital 1 | China | Female |

|      |    |   |   |   |              |            |       |        |
|------|----|---|---|---|--------------|------------|-------|--------|
| D372 | 39 | 2 | 0 | 2 | Endometritis | Hospital 1 | China | Female |
| D373 | 37 | 2 | 0 | 1 | Endometritis | Hospital 1 | China | Female |
| D374 | 34 | 1 | 0 | 0 | Endometritis | Hospital 1 | China | Female |
| D375 | 36 | 1 | 0 | 0 | Endometritis | Hospital 1 | China | Female |
| D376 | 35 | 1 | 0 | 1 | Endometritis | Hospital 1 | China | Female |
| D377 | 37 | 1 | 0 | 0 | Endometritis | Hospital 1 | China | Female |
| D378 | 34 | 2 | 0 | 1 | Endometritis | Hospital 1 | China | Female |
| D379 | 36 | 3 | 1 | 1 | Endometritis | Hospital 1 | China | Female |
| D380 | 35 | 3 | 1 | 1 | Endometritis | Hospital 1 | China | Female |
| D381 | 36 | 1 | 0 | 0 | Endometritis | Hospital 1 | China | Female |
| D382 | 37 | 2 | 0 | 0 | Endometritis | Hospital 1 | China | Female |
| D383 | 37 | 5 | 1 | 3 | Endometritis | Hospital 1 | China | Female |
| D384 | 35 | 1 | 0 | 0 | Endometritis | Hospital 1 | China | Female |
| D385 | 36 | 1 | 0 | 0 | Endometritis | Hospital 1 | China | Female |
| D386 | 36 | 3 | 0 | 2 | Endometritis | Hospital 1 | China | Female |
| D387 | 38 | 1 | 0 | 0 | Endometritis | Hospital 1 | China | Female |
| D388 | 38 | 2 | 0 | 2 | Endometritis | Hospital 1 | China | Female |
| D389 | 32 | 1 | 0 | 0 | Endometritis | Hospital 1 | China | Female |
| D390 | 35 | 1 | 0 | 0 | Endometritis | Hospital 1 | China | Female |
| D391 | 38 | 3 | 0 | 2 | Endometritis | Hospital 1 | China | Female |
| D392 | 33 | 1 | 0 | 0 | Endometritis | Hospital 1 | China | Female |
| D393 | 38 | 3 | 1 | 1 | Endometritis | Hospital 1 | China | Female |
| D394 | 31 | 2 | 0 | 2 | Endometritis | Hospital 1 | China | Female |
| D395 | 33 | 1 | 0 | 0 | Endometritis | Hospital 1 | China | Female |
| D396 | 35 | 3 | 0 | 3 | Endometritis | Hospital 1 | China | Female |

|      |    |   |   |   |              |            |       |        |
|------|----|---|---|---|--------------|------------|-------|--------|
| D397 | 30 | 1 | 0 | 0 | Endometritis | Hospital 1 | China | Female |
| D398 | 37 | 2 | 0 | 1 | Endometritis | Hospital 1 | China | Female |
| D399 | 34 | 1 | 0 | 1 | Endometritis | Hospital 1 | China | Female |
| D400 | 34 | 1 | 0 | 0 | Endometritis | Hospital 1 | China | Female |
| D401 | 36 | 2 | 0 | 1 | Endometritis | Hospital 1 | China | Female |
| D402 | 37 | 1 | 0 | 0 | Endometritis | Hospital 1 | China | Female |
| D403 | 37 | 2 | 0 | 0 | Endometritis | Hospital 1 | China | Female |
| D404 | 35 | 1 | 0 | 0 | Endometritis | Hospital 1 | China | Female |
| D405 | 37 | 1 | 0 | 0 | Endometritis | Hospital 1 | China | Female |
| D406 | 37 | 1 | 0 | 0 | Endometritis | Hospital 1 | China | Female |
| D407 | 36 | 1 | 0 | 0 | Endometritis | Hospital 1 | China | Female |
| D408 | 36 | 5 | 0 | 4 | Endometritis | Hospital 1 | China | Female |
| D409 | 30 | 3 | 1 | 2 | Endometritis | Hospital 1 | China | Female |
| D410 | 37 | 2 | 0 | 1 | Endometritis | Hospital 1 | China | Female |
| D411 | 35 | 3 | 0 | 1 | Endometritis | Hospital 1 | China | Female |
| D412 | 36 | 3 | 0 | 2 | Endometritis | Hospital 1 | China | Female |
| D413 | 38 | 1 | 0 | 0 | Endometritis | Hospital 1 | China | Female |
| D414 | 32 | 2 | 0 | 1 | Endometritis | Hospital 1 | China | Female |
| D415 | 37 | 2 | 1 | 0 | Endometritis | Hospital 1 | China | Female |
| D416 | 37 | 1 | 0 | 1 | Endometritis | Hospital 1 | China | Female |
| D417 | 37 | 2 | 0 | 1 | Endometritis | Hospital 1 | China | Female |
| D418 | 37 | 1 | 0 | 0 | Endometritis | Hospital 1 | China | Female |
| D419 | 35 | 2 | 0 | 1 | Endometritis | Hospital 1 | China | Female |
| D420 | 36 | 2 | 0 | 1 | Endometritis | Hospital 1 | China | Female |
| D421 | 33 | 4 | 0 | 3 | Endometritis | Hospital 1 | China | Female |

|      |    |   |   |   |              |            |       |        |
|------|----|---|---|---|--------------|------------|-------|--------|
| D422 | 37 | 2 | 0 | 0 | Endometritis | Hospital 1 | China | Female |
| D423 | 35 | 2 | 0 | 1 | Endometritis | Hospital 1 | China | Female |
| D424 | 37 | 2 | 0 | 1 | Endometritis | Hospital 1 | China | Female |
| D425 | 30 | 1 | 0 | 0 | Endometritis | Hospital 1 | China | Female |
| D426 | 37 | 1 | 0 | 1 | Endometritis | Hospital 1 | China | Female |
| D427 | 32 | 2 | 0 | 0 | Endometritis | Hospital 1 | China | Female |
| D428 | 36 | 1 | 0 | 0 | Endometritis | Hospital 1 | China | Female |
| D429 | 37 | 1 | 0 | 0 | Endometritis | Hospital 1 | China | Female |
| D430 | 36 | 1 | 0 | 0 | Endometritis | Hospital 1 | China | Female |
| D431 | 35 | 4 | 0 | 3 | Endometritis | Hospital 1 | China | Female |
| D432 | 37 | 2 | 0 | 1 | Endometritis | Hospital 1 | China | Female |
| D433 | 37 | 5 | 1 | 3 | Endometritis | Hospital 1 | China | Female |
| D434 | 36 | 1 | 0 | 0 | Endometritis | Hospital 1 | China | Female |
| D435 | 35 | 1 | 0 | 1 | Endometritis | Hospital 1 | China | Female |
| D436 | 37 | 2 | 0 | 2 | Endometritis | Hospital 1 | China | Female |
| D437 | 37 | 1 | 0 | 0 | Endometritis | Hospital 1 | China | Female |
| D438 | 34 | 1 | 0 | 1 | Endometritis | Hospital 1 | China | Female |
| D439 | 35 | 3 | 0 | 2 | Endometritis | Hospital 1 | China | Female |
| D440 | 37 | 2 | 0 | 1 | Endometritis | Hospital 1 | China | Female |
| D441 | 37 | 1 | 0 | 0 | Endometritis | Hospital 1 | China | Female |
| D442 | 33 | 3 | 1 | 1 | Endometritis | Hospital 1 | China | Female |
| D443 | 28 | 2 | 0 | 1 | Endometritis | Hospital 1 | China | Female |
| D444 | 37 | 1 | 0 | 0 | Endometritis | Hospital 1 | China | Female |
| D445 | 36 | 2 | 0 | 2 | Endometritis | Hospital 1 | China | Female |
| D446 | 37 | 2 | 0 | 2 | Endometritis | Hospital 1 | China | Female |

|      |    |   |   |   |              |            |       |        |
|------|----|---|---|---|--------------|------------|-------|--------|
| D447 | 38 | 2 | 0 | 1 | Endometritis | Hospital 1 | China | Female |
| D448 | 37 | 2 | 0 | 0 | Endometritis | Hospital 1 | China | Female |
| D449 | 36 | 2 | 0 | 1 | Endometritis | Hospital 1 | China | Female |
| D450 | 37 | 2 | 0 | 2 | Endometritis | Hospital 1 | China | Female |
| D451 | 37 | 1 | 1 | 0 | Endometritis | Hospital 1 | China | Female |
| D452 | 37 | 1 | 0 | 0 | Endometritis | Hospital 1 | China | Female |
| D453 | 37 | 2 | 2 | 0 | Endometritis | Hospital 1 | China | Female |
| D454 | 37 | 4 | 2 | 2 | Endometritis | Hospital 1 | China | Female |
| D455 | 37 | 1 | 0 | 0 | Endometritis | Hospital 1 | China | Female |
| D456 | 36 | 2 | 0 | 2 | Endometritis | Hospital 1 | China | Female |
| D457 | 37 | 2 | 2 | 0 | Endometritis | Hospital 1 | China | Female |
| D458 | 34 | 1 | 1 | 0 | Endometritis | Hospital 1 | China | Female |
| D459 | 38 | 1 | 0 | 0 | Endometritis | Hospital 1 | China | Female |
| D460 | 37 | 2 | 2 | 0 | Endometritis | Hospital 1 | China | Female |
| D461 | 36 | 5 | 1 | 3 | Endometritis | Hospital 1 | China | Female |
| D462 | 37 | 3 | 1 | 1 | Endometritis | Hospital 1 | China | Female |
| D463 | 37 | 2 | 0 | 1 | Endometritis | Hospital 1 | China | Female |
| D464 | 35 | 3 | 1 | 1 | Endometritis | Hospital 1 | China | Female |
| D465 | 37 | 3 | 0 | 2 | Endometritis | Hospital 1 | China | Female |
| D466 | 37 | 1 | 1 | 0 | Endometritis | Hospital 1 | China | Female |
| D467 | 37 | 2 | 0 | 1 | Endometritis | Hospital 1 | China | Female |
| D468 | 37 | 2 | 1 | 0 | Endometritis | Hospital 1 | China | Female |
| D469 | 37 | 1 | 1 | 0 | Endometritis | Hospital 1 | China | Female |
| D470 | 37 | 2 | 0 | 1 | Endometritis | Hospital 1 | China | Female |
| D471 | 34 | 1 | 0 | 0 | Endometritis | Hospital 1 | China | Female |

|      |    |   |   |   |              |            |       |        |
|------|----|---|---|---|--------------|------------|-------|--------|
| D472 | 31 | 2 | 0 | 1 | Endometritis | Hospital 1 | China | Female |
| D473 | 36 | 1 | 0 | 0 | Endometritis | Hospital 1 | China | Female |
| D474 | 38 | 2 | 0 | 2 | Endometritis | Hospital 1 | China | Female |
| D475 | 37 | 1 | 0 | 0 | Endometritis | Hospital 1 | China | Female |
| D476 | 36 | 1 | 0 | 1 | Endometritis | Hospital 1 | China | Female |
| D477 | 37 | 0 | 0 | 0 | Endometritis | Hospital 1 | China | Female |
| D478 | 35 | 3 | 0 | 3 | Endometritis | Hospital 1 | China | Female |
| D479 | 37 | 2 | 0 | 2 | Endometritis | Hospital 1 | China | Female |
| D480 | 37 | 1 | 0 | 1 | Endometritis | Hospital 1 | China | Female |
| D481 | 37 | 2 | 0 | 2 | Endometritis | Hospital 1 | China | Female |
| D482 | 37 | 2 | 0 | 1 | Endometritis | Hospital 1 | China | Female |
| D483 | 36 | 2 | 0 | 2 | Endometritis | Hospital 1 | China | Female |
| D484 | 37 | 1 | 0 | 0 | Endometritis | Hospital 1 | China | Female |
| D485 | 37 | 3 | 0 | 3 | Endometritis | Hospital 1 | China | Female |
| D486 | 38 | 2 | 0 | 1 | Endometritis | Hospital 1 | China | Female |
| D487 | 34 | 1 | 0 | 0 | Endometritis | Hospital 1 | China | Female |
| D488 | 37 | 3 | 0 | 1 | Endometritis | Hospital 1 | China | Female |
| D489 | 37 | 1 | 0 | 1 | Endometritis | Hospital 1 | China | Female |
| D490 | 36 | 1 | 0 | 0 | Endometritis | Hospital 1 | China | Female |
| D491 | 35 | 1 | 0 | 1 | Endometritis | Hospital 1 | China | Female |
| D492 | 37 | 2 | 1 | 1 | Endometritis | Hospital 1 | China | Female |
| D493 | 36 | 1 | 0 | 0 | Endometritis | Hospital 1 | China | Female |
| D494 | 28 | 2 | 0 | 1 | Endometritis | Hospital 1 | China | Female |
| D495 | 30 | 1 | 0 | 0 | Endometritis | Hospital 1 | China | Female |
| D496 | 37 | 2 | 0 | 1 | Endometritis | Hospital 1 | China | Female |



|      |    |   |   |   |              |            |       |        |
|------|----|---|---|---|--------------|------------|-------|--------|
| D497 | 37 | 2 | 0 | 0 | Endometritis | Hospital 1 | China | Female |
| D498 | 35 | 1 | 0 | 0 | Endometritis | Hospital 1 | China | Female |
| D499 | 37 | 1 | 0 | 0 | Endometritis | Hospital 1 | China | Female |
| D500 | 37 | 4 | 1 | 3 | Endometritis | Hospital 1 | China | Female |
| H501 | 28 | 2 | 0 | 1 | Health       | Hospital 1 | China | Female |
| H502 | 39 | 4 | 2 | 0 | Health       | Hospital 1 | China | Female |
| H503 | 34 | 1 | 0 | 0 | Health       | Hospital 1 | China | Female |
| H504 | 31 | 1 | 0 | 0 | Health       | Hospital 1 | China | Female |
| H505 | 26 | 1 | 0 | 0 | Health       | Hospital 1 | China | Female |
| H506 | 38 | 2 | 0 | 2 | Health       | Hospital 1 | China | Female |
| H507 | 33 | 3 | 1 | 2 | Health       | Hospital 1 | China | Female |
| H508 | 29 | 1 | 0 | 0 | Health       | Hospital 1 | China | Female |
| H509 | 32 | 1 | 0 | 1 | Health       | Hospital 1 | China | Female |
| H510 | 26 | 2 | 0 | 1 | Health       | Hospital 1 | China | Female |
| H511 | 35 | 1 | 0 | 0 | Health       | Hospital 1 | China | Female |
| H512 | 29 | 1 | 0 | 0 | Health       | Hospital 1 | China | Female |
| H513 | 34 | 4 | 0 | 2 | Health       | Hospital 1 | China | Female |
| H514 | 36 | 2 | 0 | 0 | Health       | Hospital 1 | China | Female |
| H515 | 24 | 2 | 0 | 1 | Health       | Hospital 1 | China | Female |
| H516 | 40 | 1 | 0 | 0 | Health       | Hospital 1 | China | Female |
| H517 | 32 | 1 | 0 | 0 | Health       | Hospital 1 | China | Female |
| H518 | 25 | 2 | 0 | 0 | Health       | Hospital 1 | China | Female |
| H519 | 28 | 2 | 1 | 0 | Health       | Hospital 1 | China | Female |
| H520 | 25 | 1 | 0 | 0 | Health       | Hospital 1 | China | Female |
| H521 | 27 | 3 | 1 | 2 | Health       | Hospital 1 | China | Female |

|      |    |   |   |   |        |            |       |        |
|------|----|---|---|---|--------|------------|-------|--------|
| H522 | 30 | 1 | 1 | 0 | Health | Hospital 1 | China | Female |
| H523 | 36 | 1 | 0 | 0 | Health | Hospital 1 | China | Female |
| H524 | 27 | 2 | 0 | 1 | Health | Hospital 1 | China | Female |
| H525 | 31 | 3 | 0 | 1 | Health | Hospital 1 | China | Female |
| H526 | 33 | 1 | 0 | 1 | Health | Hospital 1 | China | Female |
| H527 | 31 | 2 | 0 | 2 | Health | Hospital 1 | China | Female |
| H528 | 33 | 1 | 0 | 1 | Health | Hospital 1 | China | Female |
| H529 | 37 | 2 | 0 | 1 | Health | Hospital 1 | China | Female |
| H530 | 36 | 1 | 0 | 1 | Health | Hospital 1 | China | Female |
| H531 | 33 | 1 | 0 | 1 | Health | Hospital 1 | China | Female |
| H532 | 32 | 2 | 1 | 1 | Health | Hospital 1 | China | Female |
| H533 | 30 | 1 | 0 | 0 | Health | Hospital 1 | China | Female |
| H534 | 31 | 2 | 0 | 1 | Health | Hospital 1 | China | Female |
| H535 | 29 | 1 | 0 | 0 | Health | Hospital 1 | China | Female |
| H536 | 32 | 1 | 0 | 0 | Health | Hospital 1 | China | Female |
| H537 | 31 | 1 | 0 | 1 | Health | Hospital 1 | China | Female |
| H538 | 29 | 1 | 0 | 0 | Health | Hospital 1 | China | Female |
| H539 | 27 | 2 | 0 | 1 | Health | Hospital 1 | China | Female |
| H540 | 32 | 1 | 0 | 1 | Health | Hospital 1 | China | Female |
| H541 | 30 | 1 | 0 | 0 | Health | Hospital 1 | China | Female |
| H542 | 30 | 2 | 0 | 2 | Health | Hospital 1 | China | Female |
| H543 | 29 | 1 | 0 | 0 | Health | Hospital 1 | China | Female |
| H544 | 30 | 1 | 0 | 0 | Health | Hospital 1 | China | Female |
| H545 | 32 | 1 | 0 | 0 | Health | Hospital 1 | China | Female |
| H546 | 22 | 0 | 0 | 0 | Health | Hospital 1 | China | Female |

|      |    |   |   |   |        |            |       |        |
|------|----|---|---|---|--------|------------|-------|--------|
| H547 | 30 | 1 | 0 | 0 | Health | Hospital 1 | China | Female |
| H548 | 26 | 1 | 0 | 0 | Health | Hospital 1 | China | Female |
| H549 | 28 | 1 | 0 | 0 | Health | Hospital 1 | China | Female |
| H550 | 36 | 1 | 0 | 0 | Health | Hospital 1 | China | Female |
| H551 | 35 | 1 | 0 | 0 | Health | Hospital 1 | China | Female |
| H552 | 39 | 3 | 0 | 2 | Health | Hospital 1 | China | Female |
| H553 | 32 | 2 | 0 | 1 | Health | Hospital 1 | China | Female |
| H554 | 32 | 2 | 0 | 1 | Health | Hospital 1 | China | Female |
| H555 | 34 | 1 | 0 | 0 | Health | Hospital 1 | China | Female |
| H556 | 37 | 1 | 0 | 0 | Health | Hospital 1 | China | Female |
| H557 | 32 | 1 | 0 | 0 | Health | Hospital 1 | China | Female |
| H558 | 34 | 1 | 0 | 0 | Health | Hospital 1 | China | Female |
| H559 | 32 | 1 | 0 | 0 | Health | Hospital 1 | China | Female |
| H560 | 32 | 1 | 0 | 0 | Health | Hospital 1 | China | Female |
| H561 | 33 | 2 | 0 | 2 | Health | Hospital 1 | China | Female |
| H562 | 28 | 2 | 0 | 1 | Health | Hospital 1 | China | Female |
| H563 | 31 | 1 | 0 | 0 | Health | Hospital 1 | China | Female |
| H564 | 35 | 1 | 0 | 0 | Health | Hospital 1 | China | Female |
| H565 | 27 | 2 | 0 | 0 | Health | Hospital 1 | China | Female |
| H566 | 36 | 2 | 0 | 1 | Health | Hospital 1 | China | Female |
| H567 | 36 | 1 | 0 | 0 | Health | Hospital 1 | China | Female |
| H568 | 32 | 2 | 0 | 2 | Health | Hospital 1 | China | Female |
| H569 | 35 | 2 | 0 | 1 | Health | Hospital 1 | China | Female |
| H570 | 32 | 3 | 0 | 2 | Health | Hospital 1 | China | Female |
| H571 | 31 | 1 | 0 | 0 | Health | Hospital 1 | China | Female |

|      |    |   |   |   |        |            |       |        |
|------|----|---|---|---|--------|------------|-------|--------|
| H572 | 32 | 1 | 0 | 0 | Health | Hospital 1 | China | Female |
| H573 | 22 | 2 | 0 | 1 | Health | Hospital 1 | China | Female |
| H574 | 28 | 2 | 0 | 0 | Health | Hospital 1 | China | Female |
| H575 | 30 | 3 | 0 | 2 | Health | Hospital 1 | China | Female |
| H576 | 36 | 1 | 0 | 0 | Health | Hospital 1 | China | Female |
| H577 | 24 | 1 | 0 | 0 | Health | Hospital 1 | China | Female |
| H578 | 27 | 1 | 0 | 0 | Health | Hospital 1 | China | Female |
| H579 | 37 | 1 | 0 | 0 | Health | Hospital 1 | China | Female |
| H580 | 34 | 1 | 0 | 0 | Health | Hospital 1 | China | Female |
| H581 | 24 | 1 | 0 | 0 | Health | Hospital 1 | China | Female |
| H582 | 32 | 2 | 0 | 1 | Health | Hospital 1 | China | Female |
| H583 | 37 | 1 | 0 | 0 | Health | Hospital 1 | China | Female |
| H584 | 33 | 1 | 0 | 0 | Health | Hospital 1 | China | Female |
| H585 | 34 | 1 | 0 | 0 | Health | Hospital 1 | China | Female |
| H586 | 33 | 0 | 0 | 0 | Health | Hospital 1 | China | Female |
| H587 | 37 | 2 | 0 | 1 | Health | Hospital 1 | China | Female |
| H588 | 36 | 1 | 0 | 1 | Health | Hospital 1 | China | Female |
| H589 | 33 | 2 | 0 | 1 | Health | Hospital 1 | China | Female |
| H590 | 39 | 1 | 0 | 0 | Health | Hospital 1 | China | Female |
| H591 | 27 | 1 | 0 | 0 | Health | Hospital 1 | China | Female |
| H592 | 36 | 1 | 0 | 0 | Health | Hospital 1 | China | Female |
| H593 | 28 | 2 | 0 | 0 | Health | Hospital 1 | China | Female |
| H594 | 31 | 1 | 0 | 0 | Health | Hospital 1 | China | Female |
| H595 | 32 | 2 | 0 | 1 | Health | Hospital 1 | China | Female |
| H596 | 26 | 1 | 0 | 0 | Health | Hospital 1 | China | Female |

|      |    |   |   |   |        |            |       |        |
|------|----|---|---|---|--------|------------|-------|--------|
| H597 | 34 | 2 | 0 | 2 | Health | Hospital 1 | China | Female |
| H598 | 40 | 1 | 0 | 0 | Health | Hospital 1 | China | Female |
| H599 | 29 | 2 | 0 | 1 | Health | Hospital 1 | China | Female |
| H600 | 37 | 2 | 0 | 2 | Health | Hospital 1 | China | Female |
| H601 | 29 | 3 | 1 | 1 | Health | Hospital 1 | China | Female |
| H602 | 39 | 1 | 0 | 0 | Health | Hospital 1 | China | Female |
| H603 | 36 | 2 | 0 | 0 | Health | Hospital 1 | China | Female |
| H604 | 29 | 3 | 0 | 2 | Health | Hospital 1 | China | Female |
| H605 | 35 | 3 | 0 | 2 | Health | Hospital 1 | China | Female |
| H606 | 28 | 2 | 0 | 1 | Health | Hospital 1 | China | Female |
| H607 | 27 | 1 | 0 | 0 | Health | Hospital 1 | China | Female |
| H608 | 35 | 1 | 0 | 0 | Health | Hospital 1 | China | Female |
| H609 | 27 | 2 | 0 | 1 | Health | Hospital 1 | China | Female |
| H610 | 31 | 2 | 0 | 0 | Health | Hospital 1 | China | Female |
| H611 | 30 | 1 | 0 | 0 | Health | Hospital 1 | China | Female |
| H612 | 29 | 2 | 0 | 1 | Health | Hospital 1 | China | Female |
| H613 | 22 | 1 | 0 | 1 | Health | Hospital 1 | China | Female |
| H614 | 31 | 1 | 0 | 0 | Health | Hospital 1 | China | Female |
| H615 | 32 | 2 | 1 | 0 | Health | Hospital 1 | China | Female |
| H616 | 36 | 3 | 0 | 2 | Health | Hospital 1 | China | Female |
| H617 | 36 | 1 | 0 | 0 | Health | Hospital 1 | China | Female |
| H618 | 32 | 1 | 0 | 0 | Health | Hospital 1 | China | Female |
| H619 | 30 | 1 | 0 | 0 | Health | Hospital 1 | China | Female |
| H620 | 32 | 1 | 0 | 0 | Health | Hospital 1 | China | Female |
| H621 | 27 | 1 | 0 | 0 | Health | Hospital 1 | China | Female |

|      |    |   |   |   |        |            |       |        |
|------|----|---|---|---|--------|------------|-------|--------|
| H622 | 25 | 3 | 0 | 2 | Health | Hospital 1 | China | Female |
| H623 | 33 | 1 | 0 | 1 | Health | Hospital 1 | China | Female |
| H624 | 24 | 2 | 0 | 1 | Health | Hospital 1 | China | Female |
| H625 | 23 | 1 | 0 | 0 | Health | Hospital 1 | China | Female |
| H626 | 21 | 2 | 0 | 1 | Health | Hospital 1 | China | Female |
| H627 | 32 | 3 | 0 | 2 | Health | Hospital 1 | China | Female |
| H628 | 47 | 2 | 0 | 0 | Health | Hospital 1 | China | Female |
| H629 | 39 | 1 | 0 | 0 | Health | Hospital 1 | China | Female |
| H630 | 28 | 3 | 0 | 1 | Health | Hospital 1 | China | Female |
| H631 | 32 | 2 | 0 | 1 | Health | Hospital 1 | China | Female |
| H632 | 31 | 3 | 0 | 2 | Health | Hospital 1 | China | Female |
| H633 | 30 | 2 | 0 | 0 | Health | Hospital 1 | China | Female |
| H634 | 27 | 3 | 0 | 2 | Health | Hospital 1 | China | Female |
| H635 | 26 | 1 | 0 | 0 | Health | Hospital 1 | China | Female |
| H636 | 26 | 2 | 0 | 0 | Health | Hospital 1 | China | Female |
| H637 | 20 | 2 | 0 | 1 | Health | Hospital 1 | China | Female |
| H638 | 23 | 2 | 0 | 1 | Health | Hospital 1 | China | Female |
| H639 | 38 | 1 | 0 | 0 | Health | Hospital 1 | China | Female |
| H640 | 36 | 3 | 0 | 0 | Health | Hospital 1 | China | Female |
| H641 | 35 | 2 | 0 | 0 | Health | Hospital 1 | China | Female |
| H642 | 31 | 1 | 0 | 0 | Health | Hospital 1 | China | Female |
| H643 | 34 | 1 | 0 | 0 | Health | Hospital 1 | China | Female |
| H644 | 24 | 1 | 0 | 0 | Health | Hospital 1 | China | Female |
| H645 | 27 | 1 | 0 | 0 | Health | Hospital 1 | China | Female |
| H646 | 41 | 1 | 0 | 0 | Health | Hospital 1 | China | Female |

|      |    |   |   |   |        |            |       |        |
|------|----|---|---|---|--------|------------|-------|--------|
| H647 | 34 | 3 | 0 | 3 | Health | Hospital 1 | China | Female |
| H648 | 24 | 3 | 0 | 2 | Health | Hospital 1 | China | Female |
| H649 | 32 | 1 | 0 | 1 | Health | Hospital 1 | China | Female |
| H650 | 34 | 1 | 0 | 0 | Health | Hospital 1 | China | Female |
| H651 | 31 | 1 | 0 | 0 | Health | Hospital 1 | China | Female |
| H652 | 26 | 1 | 0 | 0 | Health | Hospital 1 | China | Female |
| H653 | 38 | 1 | 0 | 1 | Health | Hospital 1 | China | Female |
| H654 | 33 | 2 | 0 | 2 | Health | Hospital 1 | China | Female |
| H655 | 29 | 1 | 0 | 0 | Health | Hospital 1 | China | Female |
| H656 | 38 | 1 | 0 | 0 | Health | Hospital 1 | China | Female |
| H657 | 26 | 3 | 0 | 1 | Health | Hospital 1 | China | Female |
| H658 | 27 | 3 | 0 | 2 | Health | Hospital 1 | China | Female |
| H659 | 28 | 2 | 0 | 0 | Health | Hospital 1 | China | Female |
| H660 | 26 | 3 | 0 | 2 | Health | Hospital 1 | China | Female |
| H661 | 31 | 2 | 0 | 2 | Health | Hospital 1 | China | Female |
| H662 | 34 | 4 | 0 | 3 | Health | Hospital 1 | China | Female |
| H663 | 29 | 2 | 0 | 1 | Health | Hospital 1 | China | Female |
| H664 | 40 | 2 | 0 | 0 | Health | Hospital 1 | China | Female |
| H665 | 32 | 1 | 0 | 0 | Health | Hospital 1 | China | Female |
| H666 | 28 | 1 | 0 | 1 | Health | Hospital 1 | China | Female |
| H667 | 36 | 3 | 0 | 0 | Health | Hospital 1 | China | Female |
| H668 | 36 | 1 | 0 | 0 | Health | Hospital 1 | China | Female |
| H669 | 26 | 3 | 1 | 0 | Health | Hospital 1 | China | Female |
| H670 | 33 | 3 | 0 | 1 | Health | Hospital 1 | China | Female |
| H671 | 36 | 4 | 0 | 3 | Health | Hospital 1 | China | Female |

|      |    |   |   |   |        |            |       |        |
|------|----|---|---|---|--------|------------|-------|--------|
| H672 | 27 | 1 | 0 | 0 | Health | Hospital 1 | China | Female |
| H673 | 36 | 1 | 0 | 0 | Health | Hospital 1 | China | Female |
| H674 | 29 | 2 | 0 | 0 | Health | Hospital 1 | China | Female |
| H675 | 45 | 1 | 0 | 0 | Health | Hospital 1 | China | Female |
| H676 | 28 | 2 | 0 | 0 | Health | Hospital 1 | China | Female |
| H677 | 31 | 2 | 0 | 1 | Health | Hospital 1 | China | Female |
| H678 | 32 | 1 | 0 | 0 | Health | Hospital 1 | China | Female |
| H679 | 28 | 1 | 0 | 0 | Health | Hospital 1 | China | Female |
| H680 | 25 | 1 | 1 | 0 | Health | Hospital 1 | China | Female |
| H681 | 35 | 1 | 0 | 0 | Health | Hospital 1 | China | Female |
| H682 | 33 | 2 | 0 | 0 | Health | Hospital 1 | China | Female |
| H683 | 28 | 1 | 0 | 0 | Health | Hospital 1 | China | Female |
| H684 | 29 | 1 | 0 | 0 | Health | Hospital 1 | China | Female |
| H685 | 27 | 1 | 0 | 0 | Health | Hospital 1 | China | Female |
| H686 | 29 | 2 | 0 | 1 | Health | Hospital 1 | China | Female |
| H687 | 30 | 2 | 0 | 1 | Health | Hospital 1 | China | Female |
| H688 | 30 | 1 | 0 | 0 | Health | Hospital 1 | China | Female |
| H689 | 33 | 2 | 0 | 0 | Health | Hospital 1 | China | Female |
| H690 | 37 | 2 | 0 | 0 | Health | Hospital 1 | China | Female |
| H691 | 36 | 2 | 0 | 0 | Health | Hospital 1 | China | Female |
| H692 | 33 | 2 | 1 | 0 | Health | Hospital 1 | China | Female |
| H693 | 32 | 1 | 0 | 0 | Health | Hospital 1 | China | Female |
| H694 | 30 | 1 | 0 | 0 | Health | Hospital 1 | China | Female |
| H695 | 28 | 2 | 1 | 2 | Health | Hospital 1 | China | Female |
| H696 | 30 | 1 | 0 | 0 | Health | Hospital 1 | China | Female |



|      |    |   |   |   |        |            |       |        |
|------|----|---|---|---|--------|------------|-------|--------|
| H697 | 39 | 2 | 0 | 2 | Health | Hospital 1 | China | Female |
| H698 | 34 | 2 | 0 | 0 | Health | Hospital 1 | China | Female |
| H699 | 32 | 3 | 0 | 2 | Health | Hospital 1 | China | Female |
| H700 | 31 | 1 | 0 | 0 | Health | Hospital 1 | China | Female |
| H701 | 32 | 1 | 0 | 0 | Health | Hospital 1 | China | Female |
| H702 | 26 | 2 | 0 | 2 | Health | Hospital 1 | China | Female |
| H703 | 34 | 3 | 0 | 1 | Health | Hospital 1 | China | Female |
| H704 | 28 | 1 | 0 | 1 | Health | Hospital 1 | China | Female |
| H705 | 36 | 1 | 0 | 0 | Health | Hospital 1 | China | Female |
| H706 | 29 | 3 | 0 | 2 | Health | Hospital 1 | China | Female |
| H707 | 29 | 1 | 0 | 0 | Health | Hospital 1 | China | Female |
| H708 | 32 | 2 | 0 | 1 | Health | Hospital 1 | China | Female |
| H709 | 32 | 4 | 0 | 2 | Health | Hospital 1 | China | Female |
| H710 | 25 | 1 | 0 | 0 | Health | Hospital 1 | China | Female |
| H711 | 35 | 3 | 0 | 1 | Health | Hospital 1 | China | Female |
| H712 | 34 | 1 | 0 | 0 | Health | Hospital 1 | China | Female |
| H713 | 40 | 1 | 0 | 0 | Health | Hospital 1 | China | Female |
| H714 | 21 | 4 | 0 | 0 | Health | Hospital 1 | China | Female |
| H715 | 28 | 1 | 0 | 0 | Health | Hospital 1 | China | Female |
| H716 | 30 | 2 | 0 | 0 | Health | Hospital 1 | China | Female |
| H717 | 22 | 4 | 0 | 0 | Health | Hospital 1 | China | Female |
| H718 | 30 | 2 | 0 | 0 | Health | Hospital 1 | China | Female |
| H719 | 33 | 4 | 0 | 1 | Health | Hospital 1 | China | Female |
| H720 | 35 | 1 | 0 | 0 | Health | Hospital 1 | China | Female |
| H721 | 28 | 1 | 0 | 0 | Health | Hospital 1 | China | Female |

|      |    |   |   |   |        |            |       |        |
|------|----|---|---|---|--------|------------|-------|--------|
| H722 | 38 | 2 | 0 | 0 | Health | Hospital 1 | China | Female |
| H723 | 26 | 1 | 0 | 0 | Health | Hospital 1 | China | Female |
| H724 | 34 | 1 | 0 | 0 | Health | Hospital 1 | China | Female |
| H725 | 28 | 1 | 0 | 0 | Health | Hospital 1 | China | Female |
| H726 | 36 | 1 | 0 | 0 | Health | Hospital 1 | China | Female |
| H727 | 34 | 3 | 0 | 1 | Health | Hospital 1 | China | Female |
| H728 | 38 | 3 | 0 | 1 | Health | Hospital 1 | China | Female |
| H729 | 38 | 1 | 0 | 0 | Health | Hospital 1 | China | Female |
| H730 | 34 | 2 | 0 | 0 | Health | Hospital 1 | China | Female |
| H731 | 31 | 1 | 0 | 0 | Health | Hospital 1 | China | Female |
| H732 | 29 | 4 | 0 | 0 | Health | Hospital 1 | China | Female |
| H733 | 32 | 3 | 0 | 2 | Health | Hospital 1 | China | Female |
| H734 | 33 | 1 | 0 | 0 | Health | Hospital 1 | China | Female |
| H735 | 32 | 2 | 0 | 2 | Health | Hospital 1 | China | Female |
| H736 | 34 | 1 | 0 | 0 | Health | Hospital 1 | China | Female |
| H737 | 37 | 1 | 0 | 0 | Health | Hospital 1 | China | Female |
| H738 | 25 | 1 | 0 | 0 | Health | Hospital 1 | China | Female |
| H739 | 29 | 2 | 0 | 0 | Health | Hospital 1 | China | Female |
| H740 | 36 | 2 | 0 | 1 | Health | Hospital 1 | China | Female |
| H741 | 34 | 1 | 0 | 0 | Health | Hospital 1 | China | Female |
| H742 | 37 | 1 | 0 | 0 | Health | Hospital 1 | China | Female |
| H743 | 28 | 1 | 0 | 0 | Health | Hospital 1 | China | Female |
| H744 | 26 | 1 | 0 | 0 | Health | Hospital 1 | China | Female |
| H745 | 27 | 1 | 0 | 0 | Health | Hospital 1 | China | Female |
| H746 | 27 | 2 | 0 | 1 | Health | Hospital 1 | China | Female |

|      |    |   |   |   |        |            |       |        |
|------|----|---|---|---|--------|------------|-------|--------|
| H747 | 23 | 1 | 0 | 1 | Health | Hospital 1 | China | Female |
| H748 | 33 | 1 | 0 | 1 | Health | Hospital 1 | China | Female |
| H749 | 28 | 1 | 0 | 1 | Health | Hospital 1 | China | Female |
| H750 | 29 | 1 | 0 | 0 | Health | Hospital 1 | China | Female |
| H751 | 30 | 1 | 0 | 0 | Health | Hospital 1 | China | Female |
| H752 | 31 | 1 | 0 | 0 | Health | Hospital 1 | China | Female |
| H753 | 29 | 2 | 0 | 1 | Health | Hospital 1 | China | Female |
| H754 | 35 | 1 | 1 | 0 | Health | Hospital 1 | China | Female |
| H755 | 33 | 1 | 0 | 0 | Health | Hospital 1 | China | Female |
| H756 | 29 | 1 | 0 | 0 | Health | Hospital 1 | China | Female |
| H757 | 39 | 1 | 0 | 0 | Health | Hospital 1 | China | Female |
| H758 | 38 | 2 | 0 | 0 | Health | Hospital 1 | China | Female |
| H759 | 37 | 3 | 0 | 3 | Health | Hospital 1 | China | Female |
| H760 | 28 | 2 | 0 | 2 | Health | Hospital 1 | China | Female |
| H761 | 29 | 4 | 1 | 3 | Health | Hospital 1 | China | Female |
| H762 | 32 | 2 | 0 | 2 | Health | Hospital 1 | China | Female |
| H763 | 28 | 1 | 0 | 0 | Health | Hospital 1 | China | Female |
| H764 | 35 | 1 | 0 | 0 | Health | Hospital 1 | China | Female |
| H765 | 34 | 3 | 0 | 0 | Health | Hospital 1 | China | Female |
| H766 | 24 | 1 | 0 | 0 | Health | Hospital 1 | China | Female |
| H767 | 30 | 1 | 0 | 0 | Health | Hospital 1 | China | Female |
| H768 | 34 | 2 | 0 | 2 | Health | Hospital 1 | China | Female |
| H769 | 27 | 2 | 0 | 1 | Health | Hospital 1 | China | Female |
| H770 | 37 | 1 | 0 | 1 | Health | Hospital 1 | China | Female |
| H771 | 34 | 2 | 0 | 0 | Health | Hospital 1 | China | Female |

|      |    |   |   |   |        |            |       |        |
|------|----|---|---|---|--------|------------|-------|--------|
| H772 | 30 | 1 | 0 | 1 | Health | Hospital 1 | China | Female |
| H773 | 33 | 3 | 0 | 2 | Health | Hospital 1 | China | Female |
| H774 | 27 | 2 | 0 | 0 | Health | Hospital 1 | China | Female |
| H775 | 37 | 4 | 1 | 3 | Health | Hospital 1 | China | Female |
| H776 | 33 | 1 | 0 | 0 | Health | Hospital 1 | China | Female |
| H777 | 37 | 1 | 0 | 0 | Health | Hospital 1 | China | Female |
| H778 | 32 | 1 | 0 | 0 | Health | Hospital 1 | China | Female |
| H779 | 29 | 2 | 0 | 0 | Health | Hospital 1 | China | Female |
| H780 | 34 | 1 | 0 | 0 | Health | Hospital 1 | China | Female |
| H781 | 37 | 4 | 0 | 2 | Health | Hospital 1 | China | Female |
| H782 | 36 | 3 | 0 | 0 | Health | Hospital 1 | China | Female |
| H783 | 37 | 1 | 0 | 0 | Health | Hospital 1 | China | Female |
| H784 | 24 | 2 | 0 | 0 | Health | Hospital 1 | China | Female |
| H785 | 26 | 1 | 0 | 0 | Health | Hospital 1 | China | Female |
| H786 | 29 | 1 | 0 | 0 | Health | Hospital 1 | China | Female |
| H787 | 30 | 2 | 0 | 1 | Health | Hospital 1 | China | Female |
| H788 | 30 | 2 | 0 | 0 | Health | Hospital 1 | China | Female |
| H789 | 33 | 2 | 0 | 0 | Health | Hospital 1 | China | Female |
| H790 | 29 | 1 | 0 | 0 | Health | Hospital 1 | China | Female |
| H791 | 33 | 2 | 0 | 0 | Health | Hospital 1 | China | Female |
| H792 | 36 | 1 | 0 | 0 | Health | Hospital 1 | China | Female |
| H793 | 25 | 2 | 0 | 0 | Health | Hospital 1 | China | Female |
| H794 | 33 | 2 | 0 | 0 | Health | Hospital 1 | China | Female |
| H795 | 35 | 2 | 0 | 0 | Health | Hospital 1 | China | Female |
| H796 | 29 | 3 | 1 | 0 | Health | Hospital 1 | China | Female |

|      |    |   |   |   |        |            |       |        |
|------|----|---|---|---|--------|------------|-------|--------|
| H797 | 31 | 3 | 0 | 0 | Health | Hospital 1 | China | Female |
| H798 | 36 | 2 | 1 | 0 | Health | Hospital 1 | China | Female |
| H799 | 35 | 2 | 1 | 0 | Health | Hospital 1 | China | Female |
| H800 | 26 | 3 | 0 | 0 | Health | Hospital 1 | China | Female |
| H801 | 24 | 2 | 0 | 0 | Health | Hospital 1 | China | Female |
| H802 | 31 | 1 | 0 | 0 | Health | Hospital 1 | China | Female |
| H803 | 29 | 2 | 1 | 0 | Health | Hospital 1 | China | Female |
| H804 | 31 | 1 | 0 | 0 | Health | Hospital 1 | China | Female |
| H805 | 30 | 3 | 0 | 2 | Health | Hospital 1 | China | Female |
| H806 | 29 | 1 | 0 | 0 | Health | Hospital 1 | China | Female |
| H807 | 28 | 3 | 1 | 0 | Health | Hospital 1 | China | Female |
| H808 | 32 | 1 | 0 | 0 | Health | Hospital 1 | China | Female |
| H809 | 26 | 1 | 1 | 0 | Health | Hospital 1 | China | Female |
| H810 | 27 | 1 | 1 | 0 | Health | Hospital 1 | China | Female |
| H811 | 41 | 2 | 0 | 1 | Health | Hospital 1 | China | Female |
| H812 | 29 | 2 | 0 | 0 | Health | Hospital 1 | China | Female |
| H813 | 25 | 1 | 0 | 1 | Health | Hospital 1 | China | Female |
| H814 | 30 | 2 | 0 | 0 | Health | Hospital 1 | China | Female |
| H815 | 25 | 5 | 0 | 1 | Health | Hospital 1 | China | Female |
| H816 | 30 | 1 | 1 | 0 | Health | Hospital 1 | China | Female |
| H817 | 25 | 2 | 0 | 0 | Health | Hospital 1 | China | Female |
| H818 | 32 | 2 | 0 | 0 | Health | Hospital 1 | China | Female |
| H819 | 32 | 3 | 1 | 0 | Health | Hospital 1 | China | Female |
| H820 | 32 | 1 | 0 | 0 | Health | Hospital 1 | China | Female |
| H821 | 34 | 1 | 0 | 0 | Health | Hospital 1 | China | Female |

|      |    |   |   |   |        |            |       |        |
|------|----|---|---|---|--------|------------|-------|--------|
| H822 | 26 | 2 | 0 | 1 | Health | Hospital 1 | China | Female |
| H823 | 30 | 1 | 0 | 0 | Health | Hospital 1 | China | Female |
| H824 | 28 | 3 | 1 | 0 | Health | Hospital 1 | China | Female |
| H825 | 33 | 2 | 0 | 0 | Health | Hospital 1 | China | Female |
| H826 | 29 | 1 | 0 | 0 | Health | Hospital 1 | China | Female |
| H827 | 37 | 3 | 0 | 0 | Health | Hospital 1 | China | Female |
| H828 | 32 | 2 | 0 | 0 | Health | Hospital 1 | China | Female |
| H829 | 32 | 4 | 0 | 0 | Health | Hospital 1 | China | Female |
| H830 | 31 | 3 | 0 | 1 | Health | Hospital 1 | China | Female |
| H831 | 39 | 2 | 0 | 0 | Health | Hospital 1 | China | Female |
| H832 | 31 | 1 | 0 | 0 | Health | Hospital 1 | China | Female |
| H833 | 37 | 2 | 1 | 0 | Health | Hospital 1 | China | Female |
| H834 | 36 | 1 | 0 | 0 | Health | Hospital 1 | China | Female |
| H835 | 34 | 2 | 0 | 0 | Health | Hospital 1 | China | Female |
| H836 | 37 | 1 | 1 | 0 | Health | Hospital 1 | China | Female |
| H837 | 33 | 2 | 0 | 0 | Health | Hospital 1 | China | Female |
| H838 | 33 | 1 | 0 | 0 | Health | Hospital 1 | China | Female |
| H839 | 33 | 1 | 0 | 0 | Health | Hospital 1 | China | Female |
| H840 | 29 | 3 | 0 | 0 | Health | Hospital 1 | China | Female |
| H841 | 33 | 4 | 1 | 0 | Health | Hospital 1 | China | Female |
| H842 | 35 | 1 | 0 | 0 | Health | Hospital 1 | China | Female |
| H843 | 32 | 1 | 0 | 0 | Health | Hospital 1 | China | Female |
| H844 | 30 | 1 | 0 | 0 | Health | Hospital 1 | China | Female |
| H845 | 32 | 1 | 0 | 0 | Health | Hospital 1 | China | Female |
| H846 | 32 | 2 | 0 | 0 | Health | Hospital 1 | China | Female |

|      |    |   |   |   |        |            |       |        |
|------|----|---|---|---|--------|------------|-------|--------|
| H847 | 38 | 1 | 0 | 0 | Health | Hospital 1 | China | Female |
| H848 | 43 | 3 | 2 | 0 | Health | Hospital 1 | China | Female |
| H849 | 26 | 3 | 0 | 0 | Health | Hospital 1 | China | Female |
| H850 | 33 | 1 | 0 | 0 | Health | Hospital 1 | China | Female |
| H851 | 37 | 5 | 0 | 0 | Health | Hospital 1 | China | Female |
| H852 | 34 | 5 | 0 | 0 | Health | Hospital 1 | China | Female |
| H853 | 27 | 1 | 0 | 0 | Health | Hospital 1 | China | Female |
| H854 | 25 | 1 | 0 | 0 | Health | Hospital 1 | China | Female |
| H855 | 23 | 1 | 0 | 0 | Health | Hospital 1 | China | Female |
| H856 | 29 | 2 | 0 | 0 | Health | Hospital 1 | China | Female |
| H857 | 31 | 2 | 0 | 1 | Health | Hospital 1 | China | Female |
| H858 | 28 | 2 | 0 | 1 | Health | Hospital 1 | China | Female |
| H859 | 30 | 4 | 0 | 1 | Health | Hospital 1 | China | Female |
| H860 | 34 | 2 | 0 | 1 | Health | Hospital 1 | China | Female |
| H861 | 28 | 2 | 0 | 0 | Health | Hospital 1 | China | Female |
| H862 | 35 | 1 | 0 | 0 | Health | Hospital 1 | China | Female |
| H863 | 24 | 0 | 0 | 0 | Health | Hospital 1 | China | Female |
| H864 | 23 | 2 | 0 | 1 | Health | Hospital 1 | China | Female |
| H865 | 29 | 1 | 0 | 0 | Health | Hospital 1 | China | Female |
| H866 | 25 | 2 | 0 | 1 | Health | Hospital 1 | China | Female |
| H867 | 26 | 0 | 0 | 0 | Health | Hospital 1 | China | Female |
| H868 | 36 | 5 | 0 | 4 | Health | Hospital 1 | China | Female |
| H869 | 27 | 1 | 1 | 0 | Health | Hospital 1 | China | Female |
| H870 | 33 | 4 | 0 | 0 | Health | Hospital 1 | China | Female |
| H871 | 28 | 2 | 1 | 0 | Health | Hospital 1 | China | Female |

|      |    |   |   |   |        |            |       |        |
|------|----|---|---|---|--------|------------|-------|--------|
| H872 | 37 | 1 | 0 | 0 | Health | Hospital 1 | China | Female |
| H873 | 28 | 1 | 1 | 0 | Health | Hospital 1 | China | Female |
| H874 | 43 | 3 | 0 | 2 | Health | Hospital 1 | China | Female |
| H875 | 34 | 4 | 1 | 1 | Health | Hospital 1 | China | Female |
| H876 | 29 | 1 | 0 | 0 | Health | Hospital 1 | China | Female |
| H877 | 41 | 2 | 0 | 0 | Health | Hospital 1 | China | Female |
| H878 | 26 | 1 | 0 | 0 | Health | Hospital 1 | China | Female |
| H879 | 32 | 4 | 0 | 0 | Health | Hospital 1 | China | Female |
| H880 | 28 | 1 | 1 | 0 | Health | Hospital 1 | China | Female |
| H881 | 32 | 2 | 0 | 0 | Health | Hospital 1 | China | Female |
| H882 | 34 | 2 | 0 | 0 | Health | Hospital 1 | China | Female |
| H883 | 33 | 4 | 0 | 3 | Health | Hospital 1 | China | Female |
| H884 | 30 | 2 | 0 | 1 | Health | Hospital 1 | China | Female |
| H885 | 33 | 1 | 1 | 0 | Health | Hospital 1 | China | Female |
| H886 | 18 | 1 | 0 | 0 | Health | Hospital 1 | China | Female |
| H887 | 29 | 1 | 0 | 0 | Health | Hospital 1 | China | Female |
| H888 | 30 | 3 | 1 | 2 | Health | Hospital 1 | China | Female |
| H889 | 37 | 1 | 0 | 0 | Health | Hospital 1 | China | Female |
| H890 | 35 | 3 | 0 | 1 | Health | Hospital 1 | China | Female |
| H891 | 32 | 2 | 0 | 0 | Health | Hospital 1 | China | Female |
| H892 | 37 | 2 | 0 | 2 | Health | Hospital 1 | China | Female |
| H893 | 34 | 1 | 0 | 0 | Health | Hospital 1 | China | Female |
| H894 | 31 | 1 | 0 | 0 | Health | Hospital 1 | China | Female |
| H895 | 32 | 3 | 0 | 2 | Health | Hospital 1 | China | Female |
| H896 | 37 | 1 | 1 | 0 | Health | Hospital 1 | China | Female |



|      |    |   |   |   |        |            |       |        |
|------|----|---|---|---|--------|------------|-------|--------|
| H897 | 27 | 3 | 0 | 0 | Health | Hospital 1 | China | Female |
| H898 | 35 | 1 | 0 | 0 | Health | Hospital 1 | China | Female |
| H899 | 31 | 1 | 0 | 0 | Health | Hospital 1 | China | Female |
| H900 | 28 | 1 | 0 | 0 | Health | Hospital 1 | China | Female |
| H901 | 34 | 4 | 1 | 3 | Health | Hospital 1 | China | Female |
| H902 | 26 | 1 | 0 | 0 | Health | Hospital 1 | China | Female |
| H903 | 29 | 4 | 0 | 0 | Health | Hospital 1 | China | Female |
| H904 | 34 | 1 | 0 | 0 | Health | Hospital 1 | China | Female |
| H905 | 29 | 1 | 0 | 0 | Health | Hospital 1 | China | Female |
| H906 | 28 | 1 | 0 | 0 | Health | Hospital 1 | China | Female |
| H907 | 31 | 2 | 0 | 2 | Health | Hospital 1 | China | Female |
| H908 | 35 | 1 | 0 | 0 | Health | Hospital 1 | China | Female |
| H909 | 30 | 1 | 0 | 1 | Health | Hospital 1 | China | Female |
| H910 | 32 | 1 | 0 | 0 | Health | Hospital 1 | China | Female |
| H911 | 36 | 2 | 0 | 1 | Health | Hospital 1 | China | Female |
| H912 | 25 | 2 | 1 | 0 | Health | Hospital 1 | China | Female |
| H913 | 28 | 4 | 0 | 3 | Health | Hospital 1 | China | Female |
| H914 | 38 | 1 | 0 | 0 | Health | Hospital 1 | China | Female |
| H915 | 30 | 1 | 0 | 0 | Health | Hospital 1 | China | Female |
| H916 | 36 | 3 | 0 | 2 | Health | Hospital 1 | China | Female |
| H917 | 29 | 2 | 0 | 1 | Health | Hospital 1 | China | Female |
| H918 | 25 | 1 | 0 | 0 | Health | Hospital 1 | China | Female |
| H919 | 33 | 2 | 0 | 1 | Health | Hospital 1 | China | Female |
| H920 | 34 | 2 | 0 | 1 | Health | Hospital 1 | China | Female |
| H921 | 37 | 1 | 0 | 0 | Health | Hospital 1 | China | Female |

|      |    |   |   |   |        |            |       |        |
|------|----|---|---|---|--------|------------|-------|--------|
| H922 | 29 | 2 | 1 | 1 | Health | Hospital 1 | China | Female |
| H923 | 33 | 2 | 0 | 0 | Health | Hospital 1 | China | Female |
| H924 | 27 | 3 | 0 | 2 | Health | Hospital 1 | China | Female |
| H925 | 32 | 3 | 0 | 2 | Health | Hospital 1 | China | Female |
| H926 | 32 | 6 | 0 | 3 | Health | Hospital 1 | China | Female |
| H927 | 28 | 3 | 0 | 2 | Health | Hospital 1 | China | Female |
| H928 | 31 | 1 | 0 | 0 | Health | Hospital 1 | China | Female |
| H929 | 32 | 3 | 0 | 2 | Health | Hospital 1 | China | Female |
| H930 | 34 | 1 | 0 | 0 | Health | Hospital 1 | China | Female |
| H931 | 29 | 1 | 0 | 0 | Health | Hospital 1 | China | Female |
| H932 | 28 | 2 | 0 | 1 | Health | Hospital 1 | China | Female |
| H933 | 30 | 1 | 0 | 0 | Health | Hospital 1 | China | Female |
| H934 | 29 | 5 | 0 | 0 | Health | Hospital 1 | China | Female |
| H935 | 35 | 1 | 0 | 0 | Health | Hospital 1 | China | Female |
| H936 | 28 | 3 | 0 | 2 | Health | Hospital 1 | China | Female |
| H937 | 30 | 1 | 1 | 0 | Health | Hospital 1 | China | Female |
| H938 | 35 | 2 | 0 | 1 | Health | Hospital 1 | China | Female |
| H939 | 27 | 2 | 0 | 1 | Health | Hospital 1 | China | Female |
| H940 | 35 | 1 | 0 | 0 | Health | Hospital 1 | China | Female |
| H941 | 32 | 4 | 1 | 2 | Health | Hospital 1 | China | Female |
| H942 | 32 | 3 | 0 | 1 | Health | Hospital 1 | China | Female |
| H943 | 29 | 1 | 0 | 0 | Health | Hospital 1 | China | Female |
| H944 | 24 | 2 | 0 | 0 | Health | Hospital 1 | China | Female |
| H945 | 31 | 3 | 0 | 0 | Health | Hospital 1 | China | Female |
| H946 | 35 | 1 | 0 | 0 | Health | Hospital 1 | China | Female |

|      |    |   |   |   |        |            |       |        |
|------|----|---|---|---|--------|------------|-------|--------|
| H947 | 30 | 1 | 0 | 0 | Health | Hospital 1 | China | Female |
| H948 | 27 | 3 | 0 | 2 | Health | Hospital 1 | China | Female |
| H949 | 39 | 1 | 0 | 0 | Health | Hospital 1 | China | Female |
| H950 | 33 | 1 | 0 | 0 | Health | Hospital 1 | China | Female |
| H951 | 32 | 3 | 0 | 1 | Health | Hospital 1 | China | Female |
| H952 | 35 | 2 | 0 | 0 | Health | Hospital 1 | China | Female |
| H953 | 33 | 2 | 0 | 0 | Health | Hospital 1 | China | Female |
| H954 | 28 | 2 | 0 | 0 | Health | Hospital 1 | China | Female |
| H955 | 32 | 2 | 0 | 0 | Health | Hospital 1 | China | Female |
| H956 | 29 | 1 | 0 | 0 | Health | Hospital 1 | China | Female |
| H957 | 31 | 3 | 0 | 2 | Health | Hospital 1 | China | Female |
| H958 | 30 | 1 | 0 | 0 | Health | Hospital 1 | China | Female |
| H959 | 26 | 1 | 0 | 0 | Health | Hospital 1 | China | Female |
| H960 | 25 | 1 | 0 | 0 | Health | Hospital 1 | China | Female |
| H961 | 31 | 1 | 0 | 0 | Health | Hospital 1 | China | Female |
| H962 | 24 | 4 | 0 | 1 | Health | Hospital 1 | China | Female |
| H963 | 36 | 1 | 0 | 1 | Health | Hospital 1 | China | Female |
| H964 | 28 | 2 | 0 | 1 | Health | Hospital 1 | China | Female |
| H965 | 36 | 3 | 0 | 2 | Health | Hospital 1 | China | Female |
| H966 | 34 | 4 | 0 | 3 | Health | Hospital 1 | China | Female |
| H967 | 32 | 1 | 0 | 0 | Health | Hospital 1 | China | Female |
| H968 | 29 | 2 | 0 | 1 | Health | Hospital 1 | China | Female |
| H969 | 37 | 2 | 0 | 1 | Health | Hospital 1 | China | Female |
| H970 | 38 | 1 | 0 | 0 | Health | Hospital 1 | China | Female |
| H971 | 23 | 3 | 1 | 1 | Health | Hospital 1 | China | Female |

|      |    |   |   |   |        |            |       |        |
|------|----|---|---|---|--------|------------|-------|--------|
| H972 | 39 | 1 | 0 | 0 | Health | Hospital 1 | China | Female |
| H973 | 35 | 1 | 0 | 0 | Health | Hospital 1 | China | Female |
| H974 | 31 | 1 | 0 | 0 | Health | Hospital 1 | China | Female |
| H975 | 31 | 3 | 0 | 2 | Health | Hospital 1 | China | Female |
| H976 | 40 | 5 | 0 | 4 | Health | Hospital 1 | China | Female |
| H977 | 28 | 2 | 0 | 1 | Health | Hospital 1 | China | Female |
| H978 | 32 | 4 | 0 | 2 | Health | Hospital 1 | China | Female |
| H979 | 38 | 1 | 0 | 1 | Health | Hospital 1 | China | Female |
| H980 | 28 | 2 | 0 | 1 | Health | Hospital 1 | China | Female |
| H981 | 29 | 1 | 0 | 0 | Health | Hospital 1 | China | Female |
| H982 | 29 | 1 | 1 | 0 | Health | Hospital 1 | China | Female |
| H983 | 33 | 2 | 0 | 1 | Health | Hospital 1 | China | Female |
| H984 | 28 | 1 | 0 | 1 | Health | Hospital 1 | China | Female |
| H985 | 41 | 2 | 0 | 1 | Health | Hospital 1 | China | Female |
| H986 | 38 | 2 | 0 | 1 | Health | Hospital 1 | China | Female |
| H987 | 29 | 1 | 0 | 0 | Health | Hospital 1 | China | Female |
| H988 | 29 | 1 | 0 | 0 | Health | Hospital 1 | China | Female |
| H989 | 28 | 2 | 0 | 1 | Health | Hospital 1 | China | Female |
| H990 | 38 | 2 | 0 | 0 | Health | Hospital 1 | China | Female |
| H991 | 31 | 1 | 0 | 0 | Health | Hospital 1 | China | Female |
| H992 | 30 | 2 | 1 | 0 | Health | Hospital 1 | China | Female |
| H993 | 28 | 1 | 0 | 0 | Health | Hospital 1 | China | Female |
| H994 | 33 | 2 | 0 | 2 | Health | Hospital 1 | China | Female |
| H995 | 40 | 1 | 0 | 0 | Health | Hospital 1 | China | Female |
| H996 | 32 | 3 | 0 | 2 | Health | Hospital 1 | China | Female |

|       |    |   |   |   |              |            |       |        |
|-------|----|---|---|---|--------------|------------|-------|--------|
| H997  | 30 | 1 | 0 | 1 | Health       | Hospital 1 | China | Female |
| H998  | 35 | 1 | 0 | 0 | Health       | Hospital 1 | China | Female |
| H999  | 20 | 2 | 0 | 2 | Health       | Hospital 1 | China | Female |
| H1000 | 27 | 1 | 0 | 0 | Health       | Hospital 1 | China | Female |
| D1001 | 32 | - | - | - | Endometritis | Hospital 2 | China | Female |
| D1002 | 38 | - | - | - | Endometritis | Hospital 2 | China | Female |
| D1003 | 41 | - | - | - | Endometritis | Hospital 2 | China | Female |
| D1004 | 53 | - | - | - | Endometritis | Hospital 2 | China | Female |
| D1005 | 55 | - | - | - | Endometritis | Hospital 2 | China | Female |
| D1006 | 30 | - | - | - | Endometritis | Hospital 2 | China | Female |
| D1007 | 58 | - | - | - | Endometritis | Hospital 2 | China | Female |
| D1008 | 31 | - | - | - | Endometritis | Hospital 2 | China | Female |
| D1009 | 39 | - | - | - | Endometritis | Hospital 2 | China | Female |
| D1010 | 35 | - | - | - | Endometritis | Hospital 2 | China | Female |
| D1011 | 39 | - | - | - | Endometritis | Hospital 2 | China | Female |
| D1012 | 37 | - | - | - | Endometritis | Hospital 2 | China | Female |
| D1013 | 40 | - | - | - | Endometritis | Hospital 2 | China | Female |
| D1014 | 31 | - | - | - | Endometritis | Hospital 2 | China | Female |
| D1015 | 51 | - | - | - | Endometritis | Hospital 2 | China | Female |
| D1016 | 48 | - | - | - | Endometritis | Hospital 2 | China | Female |
| D1017 | 30 | - | - | - | Endometritis | Hospital 2 | China | Female |
| D1018 | 32 | - | - | - | Endometritis | Hospital 2 | China | Female |
| D1019 | 38 | - | - | - | Endometritis | Hospital 2 | China | Female |
| D1020 | 38 | - | - | - | Endometritis | Hospital 2 | China | Female |
| D1021 | 41 | - | - | - | Endometritis | Hospital 2 | China | Female |

|       |    |   |   |   |              |            |       |        |
|-------|----|---|---|---|--------------|------------|-------|--------|
| D1022 | 32 | - | - | - | Endometritis | Hospital 2 | China | Female |
| D1023 | 34 | - | - | - | Endometritis | Hospital 2 | China | Female |
| D1024 | 42 | - | - | - | Endometritis | Hospital 2 | China | Female |
| D1025 | 71 | - | - | - | Endometritis | Hospital 2 | China | Female |
| D1026 | 63 | - | - | - | Endometritis | Hospital 2 | China | Female |
| D1027 | 65 | - | - | - | Endometritis | Hospital 2 | China | Female |
| D1028 | 40 | - | - | - | Endometritis | Hospital 2 | China | Female |
| D1029 | 36 | - | - | - | Endometritis | Hospital 2 | China | Female |
| D1030 | 43 | - | - | - | Endometritis | Hospital 2 | China | Female |
| D1031 | 35 | - | - | - | Endometritis | Hospital 2 | China | Female |
| D1032 | 31 | - | - | - | Endometritis | Hospital 2 | China | Female |
| D1033 | 30 | - | - | - | Endometritis | Hospital 2 | China | Female |
| D1034 | 42 | - | - | - | Endometritis | Hospital 2 | China | Female |
| D1035 | 32 | - | - | - | Endometritis | Hospital 2 | China | Female |
| D1036 | 42 | - | - | - | Endometritis | Hospital 2 | China | Female |
| D1037 | 53 | - | - | - | Endometritis | Hospital 2 | China | Female |
| D1038 | 40 | - | - | - | Endometritis | Hospital 2 | China | Female |
| D1039 | 59 | - | - | - | Endometritis | Hospital 2 | China | Female |
| D1040 | 39 | - | - | - | Endometritis | Hospital 2 | China | Female |
| D1041 | 28 | - | - | - | Endometritis | Hospital 2 | China | Female |
| D1042 | 43 | - | - | - | Endometritis | Hospital 2 | China | Female |
| D1043 | 60 | - | - | - | Endometritis | Hospital 2 | China | Female |
| D1044 | 42 | - | - | - | Endometritis | Hospital 2 | China | Female |
| D1045 | 54 | - | - | - | Endometritis | Hospital 2 | China | Female |
| D1046 | 37 | - | - | - | Endometritis | Hospital 2 | China | Female |

|       |    |   |   |   |              |            |       |        |
|-------|----|---|---|---|--------------|------------|-------|--------|
| D1047 | 50 | - | - | - | Endometritis | Hospital 2 | China | Female |
| D1048 | 33 | - | - | - | Endometritis | Hospital 2 | China | Female |
| D1049 | 59 | - | - | - | Endometritis | Hospital 2 | China | Female |
| D1050 | 56 | - | - | - | Endometritis | Hospital 2 | China | Female |
| D1051 | 38 | - | - | - | Endometritis | Hospital 2 | China | Female |
| D1052 | 33 | - | - | - | Endometritis | Hospital 2 | China | Female |
| D1053 | 47 | - | - | - | Endometritis | Hospital 2 | China | Female |
| D1054 | 32 | - | - | - | Endometritis | Hospital 2 | China | Female |
| D1055 | 52 | - | - | - | Endometritis | Hospital 2 | China | Female |
| D1056 | 49 | - | - | - | Endometritis | Hospital 2 | China | Female |
| D1057 | 43 | - | - | - | Endometritis | Hospital 2 | China | Female |
| D1058 | 34 | - | - | - | Endometritis | Hospital 2 | China | Female |
| D1059 | 36 | - | - | - | Endometritis | Hospital 2 | China | Female |
| D1060 | 32 | - | - | - | Endometritis | Hospital 2 | China | Female |
| D1061 | 58 | - | - | - | Endometritis | Hospital 2 | China | Female |
| D1062 | 32 | - | - | - | Endometritis | Hospital 2 | China | Female |
| D1063 | 33 | - | - | - | Endometritis | Hospital 2 | China | Female |
| D1064 | 40 | - | - | - | Endometritis | Hospital 2 | China | Female |
| D1065 | 35 | - | - | - | Endometritis | Hospital 2 | China | Female |
| D1066 | 25 | - | - | - | Endometritis | Hospital 2 | China | Female |
| D1067 | 48 | - | - | - | Endometritis | Hospital 2 | China | Female |
| D1068 | 39 | - | - | - | Endometritis | Hospital 2 | China | Female |
| D1069 | 54 | - | - | - | Endometritis | Hospital 2 | China | Female |
| D1070 | 60 | - | - | - | Endometritis | Hospital 2 | China | Female |
| D1071 | 41 | - | - | - | Endometritis | Hospital 2 | China | Female |

|       |    |   |   |   |              |            |       |        |
|-------|----|---|---|---|--------------|------------|-------|--------|
| D1072 | 43 | - | - | - | Endometritis | Hospital 2 | China | Female |
| D1073 | 48 | - | - | - | Endometritis | Hospital 2 | China | Female |
| D1074 | 37 | - | - | - | Endometritis | Hospital 2 | China | Female |
| D1075 | 52 | - | - | - | Endometritis | Hospital 2 | China | Female |
| D1076 | 32 | - | - | - | Endometritis | Hospital 2 | China | Female |
| D1077 | 53 | - | - | - | Endometritis | Hospital 2 | China | Female |
| D1078 | 31 | - | - | - | Endometritis | Hospital 2 | China | Female |
| D1079 | 47 | - | - | - | Endometritis | Hospital 2 | China | Female |
| D1080 | 41 | - | - | - | Endometritis | Hospital 2 | China | Female |
| D1081 | 49 | - | - | - | Endometritis | Hospital 2 | China | Female |
| D1082 | 52 | - | - | - | Endometritis | Hospital 2 | China | Female |
| D1083 | 45 | - | - | - | Endometritis | Hospital 2 | China | Female |
| D1084 | 40 | - | - | - | Endometritis | Hospital 2 | China | Female |
| D1085 | 34 | - | - | - | Endometritis | Hospital 2 | China | Female |
| D1086 | 31 | - | - | - | Endometritis | Hospital 2 | China | Female |
| D1087 | 42 | - | - | - | Endometritis | Hospital 2 | China | Female |
| D1088 | 43 | - | - | - | Endometritis | Hospital 2 | China | Female |
| D1089 | 31 | - | - | - | Endometritis | Hospital 2 | China | Female |
| D1090 | 55 | - | - | - | Endometritis | Hospital 2 | China | Female |
| D1091 | 37 | - | - | - | Endometritis | Hospital 2 | China | Female |
| D1092 | 30 | - | - | - | Endometritis | Hospital 2 | China | Female |
| D1093 | 26 | - | - | - | Endometritis | Hospital 2 | China | Female |
| D1094 | 34 | - | - | - | Endometritis | Hospital 2 | China | Female |
| D1095 | 50 | - | - | - | Endometritis | Hospital 2 | China | Female |
| D1096 | 34 | - | - | - | Endometritis | Hospital 2 | China | Female |



|       |    |   |   |   |              |            |       |        |
|-------|----|---|---|---|--------------|------------|-------|--------|
| D1097 | 65 | - | - | - | Endometritis | Hospital 2 | China | Female |
| D1098 | 37 | - | - | - | Endometritis | Hospital 2 | China | Female |
| D1099 | 42 | - | - | - | Endometritis | Hospital 2 | China | Female |
| D1100 | 51 | - | - | - | Endometritis | Hospital 2 | China | Female |
| D1101 | 34 | - | - | - | Endometritis | Hospital 2 | China | Female |
| D1102 | 45 | - | - | - | Endometritis | Hospital 2 | China | Female |
| D1103 | 39 | - | - | - | Endometritis | Hospital 2 | China | Female |
| D1104 | 43 | - | - | - | Endometritis | Hospital 2 | China | Female |
| D1105 | 32 | - | - | - | Endometritis | Hospital 2 | China | Female |
| D1106 | 41 | - | - | - | Endometritis | Hospital 2 | China | Female |
| D1107 | 38 | - | - | - | Endometritis | Hospital 2 | China | Female |
| D1108 | 37 | - | - | - | Endometritis | Hospital 2 | China | Female |
| D1109 | 34 | - | - | - | Endometritis | Hospital 2 | China | Female |
| D1110 | 38 | - | - | - | Endometritis | Hospital 2 | China | Female |
| D1111 | 31 | - | - | - | Endometritis | Hospital 2 | China | Female |
| D1112 | 40 | - | - | - | Endometritis | Hospital 2 | China | Female |
| D1113 | 31 | - | - | - | Endometritis | Hospital 2 | China | Female |
| D1114 | 54 | - | - | - | Endometritis | Hospital 2 | China | Female |
| D1115 | 40 | - | - | - | Endometritis | Hospital 2 | China | Female |
| D1116 | 39 | - | - | - | Endometritis | Hospital 2 | China | Female |
| D1117 | 33 | - | - | - | Endometritis | Hospital 2 | China | Female |
| D1118 | 33 | - | - | - | Endometritis | Hospital 2 | China | Female |
| D1119 | 63 | - | - | - | Endometritis | Hospital 2 | China | Female |
| D1120 | 33 | - | - | - | Endometritis | Hospital 2 | China | Female |
| D1121 | 48 | - | - | - | Endometritis | Hospital 2 | China | Female |

|       |    |   |   |   |              |            |       |        |
|-------|----|---|---|---|--------------|------------|-------|--------|
| D1122 | 34 | - | - | - | Endometritis | Hospital 2 | China | Female |
| D1123 | 66 | - | - | - | Endometritis | Hospital 2 | China | Female |
| D1124 | 46 | - | - | - | Endometritis | Hospital 2 | China | Female |
| D1125 | 36 | - | - | - | Endometritis | Hospital 2 | China | Female |
| D1126 | 50 | - | - | - | Endometritis | Hospital 2 | China | Female |
| D1127 | 44 | - | - | - | Endometritis | Hospital 2 | China | Female |
| D1128 | 38 | - | - | - | Endometritis | Hospital 2 | China | Female |
| D1129 | 36 | - | - | - | Endometritis | Hospital 2 | China | Female |
| D1130 | 39 | - | - | - | Endometritis | Hospital 2 | China | Female |
| D1131 | 49 | - | - | - | Endometritis | Hospital 2 | China | Female |
| D1132 | 35 | - | - | - | Endometritis | Hospital 2 | China | Female |
| D1133 | 32 | - | - | - | Endometritis | Hospital 2 | China | Female |
| D1134 | 39 | - | - | - | Endometritis | Hospital 2 | China | Female |
| D1135 | 51 | - | - | - | Endometritis | Hospital 2 | China | Female |
| D1136 | 41 | - | - | - | Endometritis | Hospital 2 | China | Female |
| D1137 | 56 | - | - | - | Endometritis | Hospital 2 | China | Female |
| D1138 | 35 | - | - | - | Endometritis | Hospital 2 | China | Female |
| D1139 | 50 | - | - | - | Endometritis | Hospital 2 | China | Female |
| D1140 | 43 | - | - | - | Endometritis | Hospital 2 | China | Female |
| D1141 | 44 | - | - | - | Endometritis | Hospital 2 | China | Female |
| D1142 | 30 | - | - | - | Endometritis | Hospital 2 | China | Female |
| D1143 | 60 | - | - | - | Endometritis | Hospital 2 | China | Female |
| D1144 | 43 | - | - | - | Endometritis | Hospital 2 | China | Female |
| D1145 | 30 | - | - | - | Endometritis | Hospital 2 | China | Female |
| D1146 | 43 | - | - | - | Endometritis | Hospital 2 | China | Female |

|       |    |   |   |   |              |            |       |        |
|-------|----|---|---|---|--------------|------------|-------|--------|
| D1147 | 33 | - | - | - | Endometritis | Hospital 2 | China | Female |
| D1148 | 36 | - | - | - | Endometritis | Hospital 2 | China | Female |
| D1149 | 67 | - | - | - | Endometritis | Hospital 2 | China | Female |
| D1150 | 47 | - | - | - | Endometritis | Hospital 2 | China | Female |
| D1151 | 40 | - | - | - | Endometritis | Hospital 2 | China | Female |
| D1152 | 43 | - | - | - | Endometritis | Hospital 2 | China | Female |
| D1153 | 38 | - | - | - | Endometritis | Hospital 2 | China | Female |
| D1154 | 38 | - | - | - | Endometritis | Hospital 2 | China | Female |
| D1155 | 52 | - | - | - | Endometritis | Hospital 2 | China | Female |
| D1156 | 49 | - | - | - | Endometritis | Hospital 2 | China | Female |
| D1157 | 27 | - | - | - | Endometritis | Hospital 2 | China | Female |
| D1158 | 47 | - | - | - | Endometritis | Hospital 2 | China | Female |
| D1159 | 29 | - | - | - | Endometritis | Hospital 2 | China | Female |
| D1160 | 43 | - | - | - | Endometritis | Hospital 2 | China | Female |
| D1161 | 30 | - | - | - | Endometritis | Hospital 2 | China | Female |
| D1162 | 38 | - | - | - | Endometritis | Hospital 2 | China | Female |
| D1163 | 33 | - | - | - | Endometritis | Hospital 2 | China | Female |
| D1164 | 45 | - | - | - | Endometritis | Hospital 2 | China | Female |
| D1165 | 37 | - | - | - | Endometritis | Hospital 2 | China | Female |
| D1166 | 40 | - | - | - | Endometritis | Hospital 2 | China | Female |
| D1167 | 33 | - | - | - | Endometritis | Hospital 2 | China | Female |
| D1168 | 41 | - | - | - | Endometritis | Hospital 2 | China | Female |
| D1169 | 52 | - | - | - | Endometritis | Hospital 2 | China | Female |
| D1170 | 62 | - | - | - | Endometritis | Hospital 2 | China | Female |
| D1171 | 27 | - | - | - | Endometritis | Hospital 2 | China | Female |

|       |    |   |   |   |              |            |       |        |
|-------|----|---|---|---|--------------|------------|-------|--------|
| D1172 | 46 | - | - | - | Endometritis | Hospital 2 | China | Female |
| D1173 | 42 | - | - | - | Endometritis | Hospital 2 | China | Female |
| D1174 | 39 | - | - | - | Endometritis | Hospital 2 | China | Female |
| D1175 | 43 | - | - | - | Endometritis | Hospital 2 | China | Female |
| D1176 | 54 | - | - | - | Endometritis | Hospital 2 | China | Female |
| D1177 | 30 | - | - | - | Endometritis | Hospital 2 | China | Female |
| D1178 | 35 | - | - | - | Endometritis | Hospital 2 | China | Female |
| D1179 | 36 | - | - | - | Endometritis | Hospital 2 | China | Female |
| D1180 | 37 | - | - | - | Endometritis | Hospital 2 | China | Female |
| D1181 | 46 | - | - | - | Endometritis | Hospital 2 | China | Female |
| D1182 | 48 | - | - | - | Endometritis | Hospital 2 | China | Female |
| D1183 | 57 | - | - | - | Endometritis | Hospital 2 | China | Female |
| D1184 | 25 | - | - | - | Endometritis | Hospital 2 | China | Female |
| D1185 | 56 | - | - | - | Endometritis | Hospital 2 | China | Female |
| D1186 | 46 | - | - | - | Endometritis | Hospital 2 | China | Female |
| D1187 | 39 | - | - | - | Endometritis | Hospital 2 | China | Female |
| D1188 | 40 | - | - | - | Endometritis | Hospital 2 | China | Female |
| D1189 | 40 | - | - | - | Endometritis | Hospital 2 | China | Female |
| D1190 | 38 | - | - | - | Endometritis | Hospital 2 | China | Female |
| D1191 | 50 | - | - | - | Endometritis | Hospital 2 | China | Female |
| D1192 | 40 | - | - | - | Endometritis | Hospital 2 | China | Female |
| D1193 | 51 | - | - | - | Endometritis | Hospital 2 | China | Female |
| D1194 | 45 | - | - | - | Endometritis | Hospital 2 | China | Female |
| D1195 | 56 | - | - | - | Endometritis | Hospital 2 | China | Female |
| D1196 | 63 | - | - | - | Endometritis | Hospital 2 | China | Female |

|       |    |   |   |   |              |            |       |        |
|-------|----|---|---|---|--------------|------------|-------|--------|
| D1197 | 33 | - | - | - | Endometritis | Hospital 2 | China | Female |
| D1198 | 60 | - | - | - | Endometritis | Hospital 2 | China | Female |
| D1199 | 73 | - | - | - | Endometritis | Hospital 2 | China | Female |
| D1200 | 32 | - | - | - | Endometritis | Hospital 2 | China | Female |
| D1201 | 41 | - | - | - | Endometritis | Hospital 2 | China | Female |
| D1202 | 40 | - | - | - | Endometritis | Hospital 2 | China | Female |
| D1203 | 25 | - | - | - | Endometritis | Hospital 2 | China | Female |
| D1204 | 58 | - | - | - | Endometritis | Hospital 2 | China | Female |
| D1205 | 52 | - | - | - | Endometritis | Hospital 2 | China | Female |
| D1206 | 32 | - | - | - | Endometritis | Hospital 2 | China | Female |
| D1207 | 31 | - | - | - | Endometritis | Hospital 2 | China | Female |
| D1208 | 43 | - | - | - | Endometritis | Hospital 2 | China | Female |
| D1209 | 51 | - | - | - | Endometritis | Hospital 2 | China | Female |
| D1210 | 46 | - | - | - | Endometritis | Hospital 2 | China | Female |
| D1211 | 44 | - | - | - | Endometritis | Hospital 2 | China | Female |
| D1212 | 66 | - | - | - | Endometritis | Hospital 2 | China | Female |
| D1213 | 34 | - | - | - | Endometritis | Hospital 2 | China | Female |
| D1214 | 68 | - | - | - | Endometritis | Hospital 2 | China | Female |
| D1215 | 53 | - | - | - | Endometritis | Hospital 2 | China | Female |
| D1216 | 32 | - | - | - | Endometritis | Hospital 2 | China | Female |
| D1217 | 27 | - | - | - | Endometritis | Hospital 2 | China | Female |
| D1218 | 62 | - | - | - | Endometritis | Hospital 2 | China | Female |
| D1219 | 45 | - | - | - | Endometritis | Hospital 2 | China | Female |
| D1220 | 44 | - | - | - | Endometritis | Hospital 2 | China | Female |
| D1221 | 34 | - | - | - | Endometritis | Hospital 2 | China | Female |

|       |    |   |   |   |              |            |       |        |
|-------|----|---|---|---|--------------|------------|-------|--------|
| D1222 | 35 | - | - | - | Endometritis | Hospital 2 | China | Female |
| D1223 | 30 | - | - | - | Endometritis | Hospital 2 | China | Female |
| D1224 | 46 | - | - | - | Endometritis | Hospital 2 | China | Female |
| D1225 | 45 | - | - | - | Endometritis | Hospital 2 | China | Female |
| D1226 | 32 | - | - | - | Endometritis | Hospital 2 | China | Female |
| D1227 | 38 | - | - | - | Endometritis | Hospital 2 | China | Female |
| D1228 | 29 | - | - | - | Endometritis | Hospital 2 | China | Female |
| D1229 | 49 | - | - | - | Endometritis | Hospital 2 | China | Female |
| D1230 | 49 | - | - | - | Endometritis | Hospital 2 | China | Female |
| D1231 | 49 | - | - | - | Endometritis | Hospital 2 | China | Female |
| D1232 | 28 | - | - | - | Endometritis | Hospital 2 | China | Female |
| D1233 | 23 | - | - | - | Endometritis | Hospital 2 | China | Female |
| D1234 | 46 | - | - | - | Endometritis | Hospital 2 | China | Female |
| D1235 | 28 | - | - | - | Endometritis | Hospital 2 | China | Female |
| D1236 | 47 | - | - | - | Endometritis | Hospital 2 | China | Female |
| D1237 | 39 | - | - | - | Endometritis | Hospital 2 | China | Female |
| D1238 | 54 | - | - | - | Endometritis | Hospital 2 | China | Female |
| D1239 | 71 | - | - | - | Endometritis | Hospital 2 | China | Female |
| D1240 | 51 | - | - | - | Endometritis | Hospital 2 | China | Female |
| D1241 | 55 | - | - | - | Endometritis | Hospital 2 | China | Female |
| D1242 | 33 | - | - | - | Endometritis | Hospital 2 | China | Female |
| D1243 | 51 | - | - | - | Endometritis | Hospital 2 | China | Female |
| D1244 | 35 | - | - | - | Endometritis | Hospital 2 | China | Female |
| D1245 | 44 | - | - | - | Endometritis | Hospital 2 | China | Female |
| D1246 | 36 | - | - | - | Endometritis | Hospital 2 | China | Female |

|       |    |   |   |   |              |            |       |        |
|-------|----|---|---|---|--------------|------------|-------|--------|
| D1247 | 36 | - | - | - | Endometritis | Hospital 2 | China | Female |
| D1248 | 48 | - | - | - | Endometritis | Hospital 2 | China | Female |
| D1249 | 42 | - | - | - | Endometritis | Hospital 2 | China | Female |
| D1250 | 22 | - | - | - | Endometritis | Hospital 2 | China | Female |
| D1251 | 36 | - | - | - | Endometritis | Hospital 2 | China | Female |
| D1252 | 36 | - | - | - | Endometritis | Hospital 2 | China | Female |
| D1253 | 32 | - | - | - | Endometritis | Hospital 2 | China | Female |
| D1254 | 50 | - | - | - | Endometritis | Hospital 2 | China | Female |
| D1255 | 46 | - | - | - | Endometritis | Hospital 2 | China | Female |
| D1256 | 32 | - | - | - | Endometritis | Hospital 2 | China | Female |
| D1257 | 28 | - | - | - | Endometritis | Hospital 2 | China | Female |
| D1258 | 41 | - | - | - | Endometritis | Hospital 2 | China | Female |
| D1259 | 28 | - | - | - | Endometritis | Hospital 2 | China | Female |
| D1260 | 29 | - | - | - | Endometritis | Hospital 2 | China | Female |
| D1261 | 50 | - | - | - | Endometritis | Hospital 2 | China | Female |
| D1262 | 52 | - | - | - | Endometritis | Hospital 2 | China | Female |
| D1263 | 40 | - | - | - | Endometritis | Hospital 2 | China | Female |
| D1264 | 55 | - | - | - | Endometritis | Hospital 2 | China | Female |
| D1265 | 62 | - | - | - | Endometritis | Hospital 2 | China | Female |
| D1266 | 49 | - | - | - | Endometritis | Hospital 2 | China | Female |
| D1267 | 42 | - | - | - | Endometritis | Hospital 2 | China | Female |
| D1268 | 40 | - | - | - | Endometritis | Hospital 2 | China | Female |
| D1269 | 27 | - | - | - | Endometritis | Hospital 2 | China | Female |
| D1270 | 36 | - | - | - | Endometritis | Hospital 2 | China | Female |
| D1271 | 52 | - | - | - | Endometritis | Hospital 2 | China | Female |

|       |    |   |   |   |              |            |       |        |
|-------|----|---|---|---|--------------|------------|-------|--------|
| D1272 | 57 | - | - | - | Endometritis | Hospital 2 | China | Female |
| D1273 | 51 | - | - | - | Endometritis | Hospital 2 | China | Female |
| D1274 | 62 | - | - | - | Endometritis | Hospital 2 | China | Female |
| D1275 | 58 | - | - | - | Endometritis | Hospital 2 | China | Female |
| D1276 | 39 | - | - | - | Endometritis | Hospital 2 | China | Female |
| D1277 | 59 | - | - | - | Endometritis | Hospital 2 | China | Female |
| D1278 | 69 | - | - | - | Endometritis | Hospital 2 | China | Female |
| D1279 | 33 | - | - | - | Endometritis | Hospital 2 | China | Female |
| D1280 | 60 | - | - | - | Endometritis | Hospital 2 | China | Female |
| D1281 | 36 | - | - | - | Endometritis | Hospital 2 | China | Female |
| D1282 | 39 | - | - | - | Endometritis | Hospital 2 | China | Female |
| D1283 | 38 | - | - | - | Endometritis | Hospital 2 | China | Female |
| D1284 | 53 | - | - | - | Endometritis | Hospital 2 | China | Female |
| D1285 | 53 | - | - | - | Endometritis | Hospital 2 | China | Female |
| D1286 | 55 | - | - | - | Endometritis | Hospital 2 | China | Female |
| D1287 | 38 | - | - | - | Endometritis | Hospital 2 | China | Female |
| D1288 | 47 | - | - | - | Endometritis | Hospital 2 | China | Female |
| D1289 | 34 | - | - | - | Endometritis | Hospital 2 | China | Female |
| D1290 | 65 | - | - | - | Endometritis | Hospital 2 | China | Female |
| D1291 | 36 | - | - | - | Endometritis | Hospital 2 | China | Female |
| D1292 | 25 | - | - | - | Endometritis | Hospital 2 | China | Female |
| D1293 | 52 | - | - | - | Endometritis | Hospital 2 | China | Female |
| D1294 | 31 | - | - | - | Endometritis | Hospital 2 | China | Female |
| D1295 | 47 | - | - | - | Endometritis | Hospital 2 | China | Female |
| D1296 | 48 | - | - | - | Endometritis | Hospital 2 | China | Female |



|       |    |   |   |   |              |            |       |        |
|-------|----|---|---|---|--------------|------------|-------|--------|
| D1297 | 28 | - | - | - | Endometritis | Hospital 2 | China | Female |
| D1298 | 47 | - | - | - | Endometritis | Hospital 2 | China | Female |
| D1299 | 41 | - | - | - | Endometritis | Hospital 2 | China | Female |
| D1300 | 33 | - | - | - | Endometritis | Hospital 2 | China | Female |
| D1301 | 30 | - | - | - | Endometritis | Hospital 2 | China | Female |
| D1302 | 35 | - | - | - | Endometritis | Hospital 2 | China | Female |
| D1303 | 33 | - | - | - | Endometritis | Hospital 2 | China | Female |
| D1304 | 47 | - | - | - | Endometritis | Hospital 2 | China | Female |
| D1305 | 51 | - | - | - | Endometritis | Hospital 2 | China | Female |
| D1306 | 43 | - | - | - | Endometritis | Hospital 2 | China | Female |
| D1307 | 45 | - | - | - | Endometritis | Hospital 2 | China | Female |
| D1308 | 48 | - | - | - | Endometritis | Hospital 2 | China | Female |
| D1309 | 45 | - | - | - | Endometritis | Hospital 2 | China | Female |
| D1310 | 38 | - | - | - | Endometritis | Hospital 2 | China | Female |
| D1311 | 58 | - | - | - | Endometritis | Hospital 2 | China | Female |
| D1312 | 41 | - | - | - | Endometritis | Hospital 2 | China | Female |
| D1313 | 41 | - | - | - | Endometritis | Hospital 2 | China | Female |
| D1314 | 31 | - | - | - | Endometritis | Hospital 2 | China | Female |
| D1315 | 34 | - | - | - | Endometritis | Hospital 2 | China | Female |
| D1316 | 34 | - | - | - | Endometritis | Hospital 2 | China | Female |
| D1317 | 34 | - | - | - | Endometritis | Hospital 2 | China | Female |
| D1318 | 41 | - | - | - | Endometritis | Hospital 2 | China | Female |
| D1319 | 51 | - | - | - | Endometritis | Hospital 2 | China | Female |
| D1320 | 39 | - | - | - | Endometritis | Hospital 2 | China | Female |
| D1321 | 28 | - | - | - | Endometritis | Hospital 2 | China | Female |

|       |    |   |   |   |              |            |       |        |
|-------|----|---|---|---|--------------|------------|-------|--------|
| D1322 | 31 | - | - | - | Endometritis | Hospital 2 | China | Female |
| D1323 | 48 | - | - | - | Endometritis | Hospital 2 | China | Female |
| D1324 | 48 | - | - | - | Endometritis | Hospital 2 | China | Female |
| D1325 | 34 | - | - | - | Endometritis | Hospital 2 | China | Female |
| D1326 | 36 | - | - | - | Endometritis | Hospital 2 | China | Female |
| D1327 | 28 | - | - | - | Endometritis | Hospital 2 | China | Female |
| D1328 | 55 | - | - | - | Endometritis | Hospital 2 | China | Female |
| D1329 | 44 | - | - | - | Endometritis | Hospital 2 | China | Female |
| D1330 | 34 | - | - | - | Endometritis | Hospital 2 | China | Female |
| D1331 | 35 | - | - | - | Endometritis | Hospital 2 | China | Female |
| D1332 | 43 | - | - | - | Endometritis | Hospital 2 | China | Female |
| D1333 | 53 | - | - | - | Endometritis | Hospital 2 | China | Female |
| D1334 | 59 | - | - | - | Endometritis | Hospital 2 | China | Female |
| D1335 | 31 | - | - | - | Endometritis | Hospital 2 | China | Female |
| D1336 | 48 | - | - | - | Endometritis | Hospital 2 | China | Female |
| D1337 | 47 | - | - | - | Endometritis | Hospital 2 | China | Female |
| D1338 | 49 | - | - | - | Endometritis | Hospital 2 | China | Female |
| D1339 | 38 | - | - | - | Endometritis | Hospital 2 | China | Female |
| D1340 | 36 | - | - | - | Endometritis | Hospital 2 | China | Female |
| D1341 | 48 | - | - | - | Endometritis | Hospital 2 | China | Female |
| D1342 | 37 | - | - | - | Endometritis | Hospital 2 | China | Female |
| D1343 | 51 | - | - | - | Endometritis | Hospital 2 | China | Female |
| D1344 | 30 | - | - | - | Endometritis | Hospital 2 | China | Female |
| D1345 | 45 | - | - | - | Endometritis | Hospital 2 | China | Female |
| D1346 | 40 | - | - | - | Endometritis | Hospital 2 | China | Female |

|       |    |   |   |   |              |            |       |        |
|-------|----|---|---|---|--------------|------------|-------|--------|
| D1347 | 49 | - | - | - | Endometritis | Hospital 2 | China | Female |
| D1348 | 44 | - | - | - | Endometritis | Hospital 2 | China | Female |
| D1349 | 45 | - | - | - | Endometritis | Hospital 2 | China | Female |
| D1350 | 70 | - | - | - | Endometritis | Hospital 2 | China | Female |
| D1351 | 31 | - | - | - | Endometritis | Hospital 2 | China | Female |
| D1352 | 52 | - | - | - | Endometritis | Hospital 2 | China | Female |
| D1353 | 40 | - | - | - | Endometritis | Hospital 2 | China | Female |
| D1354 | 51 | - | - | - | Endometritis | Hospital 2 | China | Female |
| D1355 | 41 | - | - | - | Endometritis | Hospital 2 | China | Female |
| D1356 | 57 | - | - | - | Endometritis | Hospital 2 | China | Female |
| D1357 | 57 | - | - | - | Endometritis | Hospital 2 | China | Female |
| H1358 | 26 | - | - | - | Health       | Hospital 2 | China | Female |
| H1359 | 19 | - | - | - | Health       | Hospital 2 | China | Female |
| H1360 | 40 | - | - | - | Health       | Hospital 2 | China | Female |
| H1361 | 38 | - | - | - | Health       | Hospital 2 | China | Female |
| H1362 | 39 | - | - | - | Health       | Hospital 2 | China | Female |
| H1363 | 37 | - | - | - | Health       | Hospital 2 | China | Female |
| H1364 | 28 | - | - | - | Health       | Hospital 2 | China | Female |
| H1365 | 26 | - | - | - | Health       | Hospital 2 | China | Female |
| H1366 | 27 | - | - | - | Health       | Hospital 2 | China | Female |
| H1367 | 29 | - | - | - | Health       | Hospital 2 | China | Female |
| H1368 | 23 | - | - | - | Health       | Hospital 2 | China | Female |
| H1369 | 21 | - | - | - | Health       | Hospital 2 | China | Female |
| H1370 | 38 | - | - | - | Health       | Hospital 2 | China | Female |
| H1371 | 29 | - | - | - | Health       | Hospital 2 | China | Female |

|       |    |   |   |   |        |            |       |        |
|-------|----|---|---|---|--------|------------|-------|--------|
| H1372 | 39 | - | - | - | Health | Hospital 2 | China | Female |
| H1373 | 34 | - | - | - | Health | Hospital 2 | China | Female |
| H1374 | 44 | - | - | - | Health | Hospital 2 | China | Female |
| H1375 | 37 | - | - | - | Health | Hospital 2 | China | Female |
| H1376 | 30 | - | - | - | Health | Hospital 2 | China | Female |
| H1377 | 32 | - | - | - | Health | Hospital 2 | China | Female |
| H1378 | 29 | - | - | - | Health | Hospital 2 | China | Female |
| H1379 | 31 | - | - | - | Health | Hospital 2 | China | Female |
| H1380 | 32 | - | - | - | Health | Hospital 2 | China | Female |
| H1381 | 37 | - | - | - | Health | Hospital 2 | China | Female |
| H1382 | 35 | - | - | - | Health | Hospital 2 | China | Female |
| H1383 | 42 | - | - | - | Health | Hospital 2 | China | Female |
| H1384 | 36 | - | - | - | Health | Hospital 2 | China | Female |
| H1385 | 19 | - | - | - | Health | Hospital 2 | China | Female |
| H1386 | 34 | - | - | - | Health | Hospital 2 | China | Female |
| H1387 | 22 | - | - | - | Health | Hospital 2 | China | Female |
| H1388 | 35 | - | - | - | Health | Hospital 2 | China | Female |
| H1389 | 36 | - | - | - | Health | Hospital 2 | China | Female |
| H1390 | 39 | - | - | - | Health | Hospital 2 | China | Female |
| H1391 | 34 | - | - | - | Health | Hospital 2 | China | Female |
| H1392 | 46 | - | - | - | Health | Hospital 2 | China | Female |
| H1393 | 20 | - | - | - | Health | Hospital 2 | China | Female |
| H1394 | 33 | - | - | - | Health | Hospital 2 | China | Female |
| H1395 | 30 | - | - | - | Health | Hospital 2 | China | Female |
| H1396 | 26 | - | - | - | Health | Hospital 2 | China | Female |

|       |    |   |   |   |        |            |       |        |
|-------|----|---|---|---|--------|------------|-------|--------|
| H1397 | 34 | - | - | - | Health | Hospital 2 | China | Female |
| H1398 | 33 | - | - | - | Health | Hospital 2 | China | Female |
| H1399 | 28 | - | - | - | Health | Hospital 2 | China | Female |
| H1400 | 28 | - | - | - | Health | Hospital 2 | China | Female |
| H1401 | 31 | - | - | - | Health | Hospital 2 | China | Female |
| H1402 | 26 | - | - | - | Health | Hospital 2 | China | Female |
| H1403 | 30 | - | - | - | Health | Hospital 2 | China | Female |
| H1404 | 32 | - | - | - | Health | Hospital 2 | China | Female |
| H1405 | 38 | - | - | - | Health | Hospital 2 | China | Female |
| H1406 | 37 | - | - | - | Health | Hospital 2 | China | Female |
| H1407 | 36 | - | - | - | Health | Hospital 2 | China | Female |
| H1408 | 28 | - | - | - | Health | Hospital 2 | China | Female |
| H1409 | 29 | - | - | - | Health | Hospital 2 | China | Female |
| H1410 | 38 | - | - | - | Health | Hospital 2 | China | Female |
| H1411 | 26 | - | - | - | Health | Hospital 2 | China | Female |
| H1412 | 34 | - | - | - | Health | Hospital 2 | China | Female |
| H1413 | 34 | - | - | - | Health | Hospital 2 | China | Female |
| H1414 | 35 | - | - | - | Health | Hospital 2 | China | Female |
| H1415 | 32 | - | - | - | Health | Hospital 2 | China | Female |
| H1416 | 43 | - | - | - | Health | Hospital 2 | China | Female |
| H1417 | 36 | - | - | - | Health | Hospital 2 | China | Female |
| H1418 | 41 | - | - | - | Health | Hospital 2 | China | Female |
| H1419 | 36 | - | - | - | Health | Hospital 2 | China | Female |
| H1420 | 35 | - | - | - | Health | Hospital 2 | China | Female |
| H1421 | 39 | - | - | - | Health | Hospital 2 | China | Female |

|       |    |   |   |   |        |            |       |        |
|-------|----|---|---|---|--------|------------|-------|--------|
| H1422 | 37 | - | - | - | Health | Hospital 2 | China | Female |
| H1423 | 30 | - | - | - | Health | Hospital 2 | China | Female |
| H1424 | 32 | - | - | - | Health | Hospital 2 | China | Female |
| H1425 | 30 | - | - | - | Health | Hospital 2 | China | Female |
| H1426 | 29 | - | - | - | Health | Hospital 2 | China | Female |
| H1427 | 27 | - | - | - | Health | Hospital 2 | China | Female |
| H1428 | 37 | - | - | - | Health | Hospital 2 | China | Female |
| H1429 | 29 | - | - | - | Health | Hospital 2 | China | Female |
| H1430 | 35 | - | - | - | Health | Hospital 2 | China | Female |
| H1431 | 36 | - | - | - | Health | Hospital 2 | China | Female |
| H1432 | 34 | - | - | - | Health | Hospital 2 | China | Female |
| H1433 | 31 | - | - | - | Health | Hospital 2 | China | Female |
| H1434 | 28 | - | - | - | Health | Hospital 2 | China | Female |
| H1435 | 31 | - | - | - | Health | Hospital 2 | China | Female |
| H1436 | 35 | - | - | - | Health | Hospital 2 | China | Female |
| H1437 | 36 | - | - | - | Health | Hospital 2 | China | Female |
| H1438 | 34 | - | - | - | Health | Hospital 2 | China | Female |
| H1439 | 39 | - | - | - | Health | Hospital 2 | China | Female |
| H1440 | 31 | - | - | - | Health | Hospital 2 | China | Female |
| H1441 | 27 | - | - | - | Health | Hospital 2 | China | Female |
| H1442 | 29 | - | - | - | Health | Hospital 2 | China | Female |
| H1443 | 37 | - | - | - | Health | Hospital 2 | China | Female |
| H1444 | 33 | - | - | - | Health | Hospital 2 | China | Female |
| H1445 | 39 | - | - | - | Health | Hospital 2 | China | Female |
| H1446 | 27 | - | - | - | Health | Hospital 2 | China | Female |

|       |    |   |   |   |        |            |       |        |
|-------|----|---|---|---|--------|------------|-------|--------|
| H1447 | 36 | - | - | - | Health | Hospital 2 | China | Female |
| H1448 | 31 | - | - | - | Health | Hospital 2 | China | Female |
| H1449 | 32 | - | - | - | Health | Hospital 2 | China | Female |
| H1450 | 37 | - | - | - | Health | Hospital 2 | China | Female |
| H1451 | 31 | - | - | - | Health | Hospital 2 | China | Female |
| H1452 | 40 | - | - | - | Health | Hospital 2 | China | Female |
| H1453 | 35 | - | - | - | Health | Hospital 2 | China | Female |
| H1454 | 30 | - | - | - | Health | Hospital 2 | China | Female |
| H1455 | 44 | - | - | - | Health | Hospital 2 | China | Female |
| H1456 | 32 | - | - | - | Health | Hospital 2 | China | Female |
| H1457 | 30 | - | - | - | Health | Hospital 2 | China | Female |
| H1458 | 22 | - | - | - | Health | Hospital 2 | China | Female |
| H1459 | 30 | - | - | - | Health | Hospital 2 | China | Female |
| H1460 | 32 | - | - | - | Health | Hospital 2 | China | Female |
| H1461 | 42 | - | - | - | Health | Hospital 2 | China | Female |
| H1462 | 36 | - | - | - | Health | Hospital 2 | China | Female |
| H1463 | 29 | - | - | - | Health | Hospital 2 | China | Female |
| H1464 | 33 | - | - | - | Health | Hospital 2 | China | Female |
| H1465 | 35 | - | - | - | Health | Hospital 2 | China | Female |
| H1466 | 28 | - | - | - | Health | Hospital 2 | China | Female |
| H1467 | 36 | - | - | - | Health | Hospital 2 | China | Female |
| H1468 | 35 | - | - | - | Health | Hospital 2 | China | Female |
| H1469 | 32 | - | - | - | Health | Hospital 2 | China | Female |
| H1470 | 31 | - | - | - | Health | Hospital 2 | China | Female |
| H1471 | 27 | - | - | - | Health | Hospital 2 | China | Female |

|       |    |   |   |   |        |            |       |        |
|-------|----|---|---|---|--------|------------|-------|--------|
| H1472 | 33 | - | - | - | Health | Hospital 2 | China | Female |
| H1473 | 31 | - | - | - | Health | Hospital 2 | China | Female |
| H1474 | 30 | - | - | - | Health | Hospital 2 | China | Female |
| H1475 | 44 | - | - | - | Health | Hospital 2 | China | Female |
| H1476 | 34 | - | - | - | Health | Hospital 2 | China | Female |
| H1477 | 36 | - | - | - | Health | Hospital 2 | China | Female |
| H1478 | 30 | - | - | - | Health | Hospital 2 | China | Female |
| H1479 | 29 | - | - | - | Health | Hospital 2 | China | Female |
| H1480 | 30 | - | - | - | Health | Hospital 2 | China | Female |
| H1481 | 41 | - | - | - | Health | Hospital 2 | China | Female |
| H1482 | 20 | - | - | - | Health | Hospital 2 | China | Female |
| H1483 | 35 | - | - | - | Health | Hospital 2 | China | Female |
| H1484 | 34 | - | - | - | Health | Hospital 2 | China | Female |
| H1485 | 26 | - | - | - | Health | Hospital 2 | China | Female |
| H1486 | 40 | - | - | - | Health | Hospital 2 | China | Female |
| H1487 | 34 | - | - | - | Health | Hospital 2 | China | Female |
| H1488 | 29 | - | - | - | Health | Hospital 2 | China | Female |
| H1489 | 22 | - | - | - | Health | Hospital 2 | China | Female |
| H1490 | 32 | - | - | - | Health | Hospital 2 | China | Female |
| H1491 | 31 | - | - | - | Health | Hospital 2 | China | Female |
| H1492 | 37 | - | - | - | Health | Hospital 2 | China | Female |
| H1493 | 24 | - | - | - | Health | Hospital 2 | China | Female |
| H1494 | 37 | - | - | - | Health | Hospital 2 | China | Female |
| H1495 | 38 | - | - | - | Health | Hospital 2 | China | Female |
| H1496 | 36 | - | - | - | Health | Hospital 2 | China | Female |



|       |    |   |   |   |        |            |       |        |
|-------|----|---|---|---|--------|------------|-------|--------|
| H1497 | 35 | - | - | - | Health | Hospital 2 | China | Female |
| H1498 | 34 | - | - | - | Health | Hospital 2 | China | Female |
| H1499 | 33 | - | - | - | Health | Hospital 2 | China | Female |
| H1500 | 32 | - | - | - | Health | Hospital 2 | China | Female |
| H1501 | 30 | - | - | - | Health | Hospital 2 | China | Female |
| H1502 | 38 | - | - | - | Health | Hospital 2 | China | Female |
| H1503 | 28 | - | - | - | Health | Hospital 2 | China | Female |
| H1504 | 36 | - | - | - | Health | Hospital 2 | China | Female |
| H1505 | 32 | - | - | - | Health | Hospital 2 | China | Female |
| H1506 | 30 | - | - | - | Health | Hospital 2 | China | Female |
| H1507 | 28 | - | - | - | Health | Hospital 2 | China | Female |
| H1508 | 39 | - | - | - | Health | Hospital 2 | China | Female |
| H1509 | 23 | - | - | - | Health | Hospital 2 | China | Female |
| H1510 | 33 | - | - | - | Health | Hospital 2 | China | Female |
| H1511 | 34 | - | - | - | Health | Hospital 2 | China | Female |
| H1512 | 31 | - | - | - | Health | Hospital 2 | China | Female |
| H1513 | 29 | - | - | - | Health | Hospital 2 | China | Female |
| H1514 | 33 | - | - | - | Health | Hospital 2 | China | Female |
| H1515 | 33 | - | - | - | Health | Hospital 2 | China | Female |
| H1516 | 43 | - | - | - | Health | Hospital 2 | China | Female |
| H1517 | 33 | - | - | - | Health | Hospital 2 | China | Female |
| H1518 | 36 | - | - | - | Health | Hospital 2 | China | Female |
| H1519 | 23 | - | - | - | Health | Hospital 2 | China | Female |
| H1520 | 24 | - | - | - | Health | Hospital 2 | China | Female |
| H1521 | 24 | - | - | - | Health | Hospital 2 | China | Female |

|       |    |   |   |   |        |            |       |        |
|-------|----|---|---|---|--------|------------|-------|--------|
| H1522 | 23 | - | - | - | Health | Hospital 2 | China | Female |
| H1523 | 23 | - | - | - | Health | Hospital 2 | China | Female |
| H1524 | 27 | - | - | - | Health | Hospital 2 | China | Female |
| H1525 | 30 | - | - | - | Health | Hospital 2 | China | Female |
| H1526 | 28 | - | - | - | Health | Hospital 2 | China | Female |
| H1527 | 24 | - | - | - | Health | Hospital 2 | China | Female |
| H1528 | 25 | - | - | - | Health | Hospital 2 | China | Female |
| H1529 | 44 | - | - | - | Health | Hospital 2 | China | Female |
| H1530 | 28 | - | - | - | Health | Hospital 2 | China | Female |
| H1531 | 25 | - | - | - | Health | Hospital 2 | China | Female |
| H1532 | 31 | - | - | - | Health | Hospital 2 | China | Female |
| H1533 | 25 | - | - | - | Health | Hospital 2 | China | Female |
| H1534 | 39 | - | - | - | Health | Hospital 2 | China | Female |
| H1535 | 22 | - | - | - | Health | Hospital 2 | China | Female |
| H1536 | 33 | - | - | - | Health | Hospital 2 | China | Female |
| H1537 | 32 | - | - | - | Health | Hospital 2 | China | Female |
| H1538 | 39 | - | - | - | Health | Hospital 2 | China | Female |
| H1539 | 35 | - | - | - | Health | Hospital 2 | China | Female |
| H1540 | 25 | - | - | - | Health | Hospital 2 | China | Female |
| H1541 | 40 | - | - | - | Health | Hospital 2 | China | Female |
| H1542 | 27 | - | - | - | Health | Hospital 2 | China | Female |
| H1543 | 29 | - | - | - | Health | Hospital 2 | China | Female |
| H1544 | 29 | - | - | - | Health | Hospital 2 | China | Female |
| H1545 | 26 | - | - | - | Health | Hospital 2 | China | Female |
| H1546 | 28 | - | - | - | Health | Hospital 2 | China | Female |

|       |    |   |   |   |        |            |       |        |
|-------|----|---|---|---|--------|------------|-------|--------|
| H1547 | 25 | - | - | - | Health | Hospital 2 | China | Female |
| H1548 | 31 | - | - | - | Health | Hospital 2 | China | Female |
| H1549 | 29 | - | - | - | Health | Hospital 2 | China | Female |
| H1550 | 32 | - | - | - | Health | Hospital 2 | China | Female |
| H1551 | 39 | - | - | - | Health | Hospital 2 | China | Female |
| H1552 | 39 | - | - | - | Health | Hospital 2 | China | Female |
| H1553 | 31 | - | - | - | Health | Hospital 2 | China | Female |
| H1554 | 35 | - | - | - | Health | Hospital 2 | China | Female |
| H1555 | 32 | - | - | - | Health | Hospital 2 | China | Female |
| H1556 | 35 | - | - | - | Health | Hospital 2 | China | Female |
| H1557 | 31 | - | - | - | Health | Hospital 2 | China | Female |
| H1558 | 30 | - | - | - | Health | Hospital 2 | China | Female |
| H1559 | 37 | - | - | - | Health | Hospital 2 | China | Female |
| H1560 | 32 | - | - | - | Health | Hospital 2 | China | Female |
| H1561 | 35 | - | - | - | Health | Hospital 2 | China | Female |
| H1562 | 33 | - | - | - | Health | Hospital 2 | China | Female |
| H1563 | 34 | - | - | - | Health | Hospital 2 | China | Female |
| H1564 | 40 | - | - | - | Health | Hospital 2 | China | Female |
| H1565 | 35 | - | - | - | Health | Hospital 2 | China | Female |
| H1566 | 36 | - | - | - | Health | Hospital 2 | China | Female |
| H1567 | 31 | - | - | - | Health | Hospital 2 | China | Female |
| H1568 | 28 | - | - | - | Health | Hospital 2 | China | Female |
| H1569 | 33 | - | - | - | Health | Hospital 2 | China | Female |
| H1570 | 32 | - | - | - | Health | Hospital 2 | China | Female |
| H1571 | 33 | - | - | - | Health | Hospital 2 | China | Female |

|       |    |   |   |   |        |            |       |        |
|-------|----|---|---|---|--------|------------|-------|--------|
| H1572 | 30 | - | - | - | Health | Hospital 2 | China | Female |
| H1573 | 39 | - | - | - | Health | Hospital 2 | China | Female |
| H1574 | 40 | - | - | - | Health | Hospital 2 | China | Female |
| H1575 | 29 | - | - | - | Health | Hospital 2 | China | Female |
| H1576 | 33 | - | - | - | Health | Hospital 2 | China | Female |
| H1577 | 31 | - | - | - | Health | Hospital 2 | China | Female |
| H1578 | 36 | - | - | - | Health | Hospital 2 | China | Female |
| H1579 | 29 | - | - | - | Health | Hospital 2 | China | Female |
| H1580 | 40 | - | - | - | Health | Hospital 2 | China | Female |
| H1581 | 36 | - | - | - | Health | Hospital 2 | China | Female |
| H1582 | 44 | - | - | - | Health | Hospital 2 | China | Female |
| H1583 | 36 | - | - | - | Health | Hospital 2 | China | Female |
| H1584 | 40 | - | - | - | Health | Hospital 2 | China | Female |
| H1585 | 29 | - | - | - | Health | Hospital 2 | China | Female |
| H1586 | 36 | - | - | - | Health | Hospital 2 | China | Female |
| H1587 | 34 | - | - | - | Health | Hospital 2 | China | Female |
| H1588 | 41 | - | - | - | Health | Hospital 2 | China | Female |
| H1589 | 30 | - | - | - | Health | Hospital 2 | China | Female |
| H1590 | 37 | - | - | - | Health | Hospital 2 | China | Female |
| H1591 | 31 | - | - | - | Health | Hospital 2 | China | Female |
| H1592 | 32 | - | - | - | Health | Hospital 2 | China | Female |
| H1593 | 40 | - | - | - | Health | Hospital 2 | China | Female |
| H1594 | 39 | - | - | - | Health | Hospital 2 | China | Female |
| H1595 | 35 | - | - | - | Health | Hospital 2 | China | Female |
| H1596 | 47 | - | - | - | Health | Hospital 2 | China | Female |

|       |    |   |   |   |        |            |       |        |
|-------|----|---|---|---|--------|------------|-------|--------|
| H1597 | 30 | - | - | - | Health | Hospital 2 | China | Female |
| H1598 | 36 | - | - | - | Health | Hospital 2 | China | Female |
| H1599 | 34 | - | - | - | Health | Hospital 2 | China | Female |
| H1600 | 36 | - | - | - | Health | Hospital 2 | China | Female |
| H1601 | 36 | - | - | - | Health | Hospital 2 | China | Female |
| H1602 | 36 | - | - | - | Health | Hospital 2 | China | Female |
| H1603 | 40 | - | - | - | Health | Hospital 2 | China | Female |
| H1604 | 40 | - | - | - | Health | Hospital 2 | China | Female |
| H1605 | 36 | - | - | - | Health | Hospital 2 | China | Female |
| H1606 | 36 | - | - | - | Health | Hospital 2 | China | Female |
| H1607 | 31 | - | - | - | Health | Hospital 2 | China | Female |
| H1608 | 39 | - | - | - | Health | Hospital 2 | China | Female |
| H1609 | 33 | - | - | - | Health | Hospital 2 | China | Female |
| H1610 | 45 | - | - | - | Health | Hospital 2 | China | Female |
| H1611 | 35 | - | - | - | Health | Hospital 2 | China | Female |
| H1612 | 31 | - | - | - | Health | Hospital 2 | China | Female |

**Supplementary Table 3 Summary of the public sequencing data used in this study.**

| Project ID  | Data type | # women | # uterine samples | # vaginal samples | Country  | Ethnicity                                        | Age   | Menstrual phase                   | Diagnosis                                                      |
|-------------|-----------|---------|-------------------|-------------------|----------|--------------------------------------------------|-------|-----------------------------------|----------------------------------------------------------------|
| SRP064295   | 16S V3-V5 | 5       | 19                | 7                 | USA      | Caucasian                                        | 46-59 | Not provided                      | Benign disease                                                 |
| PRJEB14941  | 16S V4    | 56      | 0                 | 288               | Tanzania | Not provided                                     | 18-39 | Not provided                      | Pregnancy                                                      |
| PRJEB16013  | 16S V4-V5 | 91      | 81                | 90                | China    | Not provided                                     | 22-48 | Proliferative 70;<br>Secretary 12 | Hysteromyoma 18;<br>Endometrial polyps 11;<br>Endometriosis 68 |
| PRJEB24147  | 16S V4-V5 | 36      | 0                 | 37                | China    | Not provided                                     | 22-45 | Proliferative 25;<br>Secretary 5  | Hysteromyoma 8;<br>Endometrial polyps 6;<br>Endometriosis 22   |
| PRJNA481576 | 16S V3-V5 | 75      | 208               | 152               | USA      | Caucasian 58;<br>Mongolian 2;<br>Not provided 15 | 29-83 | Not provided                      | Benign disease                                                 |
| PRJNA547595 | 16S V4    | 16      | 0                 | 79                | USA      | Caucasian 15;<br>Other 1                         | 15-57 | Not provided                      | Not provided                                                   |

**Supplementary Table 4 The primers used in qPCR analysis.**

| Target        | Primer  | Sequence (5'-3')         | Target                                  | Primer  | Sequence (5'-3')          |
|---------------|---------|--------------------------|-----------------------------------------|---------|---------------------------|
| TNF- $\alpha$ | Forward | CTGTGCCTCAGCCTCTTCTC     | <i>Clostridium</i>                      | Forward | TTGCTGTGTTAGAAGTGAATGAAGG |
|               | Reverse | ACTGATGAGAGGGAGCCCAT     |                                         | Reverse | TCCTAACTTCATGATTTTCCATTCC |
| IL1 $\beta$   | Forward | ACTGATGAGAGGGAGCCCAT     | <i>Prevotella</i>                       | Forward | ACTAGCAATTAGAGTCGAGCGA    |
|               | Reverse | CTCCACGGGCAAGACATAGG     |                                         | Reverse | TGCATCTACCCGAAGCTTATCG    |
| IL-17         | Forward | GAAGTTGGACCACCACATGA     | <i>Lactobacillus</i>                    | Forward | GCAATGATGCGTAGCCGAAC      |
|               | Reverse | TCCCTCTTCAGGACCAGGAT     |                                         | Reverse | GCACTTCTTCTCTAACAACAGGG   |
| CXCL5         | Forward | TGGCATTCTGCTGCTGTT       | 16S RNA                                 | 1369F   | CGGTGAATACGTTTCYCGG       |
|               | Reverse | TGCATTCCGCTTTGTTTTTC     |                                         | 1492R   | GGWTACCTTGTTACGACTT       |
| CD38          | Forward | GACGCTGCCTGATCTATACTCAA  | <i>Clostridium</i> for<br>genus level   | Forward | CGGTGAAATGCGTAGAKATTA     |
|               | Reverse | GTGCGTAGTCTTCATTGGTGATG  |                                         | Reverse | CGAATTAACCACATGCTCCG      |
| CD138         | Forward | GTGTGTTGTCTCTGAGTTTGTCTG | <i>Prevotella</i> for<br>genus level    | Forward | CCAGCCAAGTAGCGTGCA        |
|               | Reverse | CAGGCTCTTCCAATGTCACAAAG  |                                         | Reverse | TGGACCTTCCGTATTACCGC      |
| GAPDH         | Forward | AACAGCAACTCCCCTCTTC      | <i>Lactobacillus</i> for<br>genus level | Forward | CTCAAACTAAACAAAGTTTC      |
|               | Reverse | CCTCTCTTGCTCAGTGCCT      |                                         | Reverse | CTTGACACACCGCCCGTCA       |

**Supplementary Table 5 Probes used for fluorescence in situ hybridization.**

| Probe                        | Sequence (5'-3')     |
|------------------------------|----------------------|
| EUB338I                      | GCTGCCTCCCGTAGGAGT   |
| EUB338II                     | GCAGCCACCCGTAGGTGT   |
| EUB338III                    | GCTGCCACCCGTAGGTGT   |
| NON338                       | ACTCCTACGGGAGGCAGC   |
| <i>Clostridium</i> -specific | CCTTTGGTTGAATGATGATG |
| <i>Prevotella</i> -specific  | GCTATCTATTCGCTGCCCTC |
